# Supplementary material for: Comprehensive Analysis of hsa-miR-654-5p’s Tumor-Suppressing Functions
Source: MDPI journal article supplement (doi:10.3390/ijms23126411), 2022-06-08
Supplement: s1 [file s1]

# Supplementary Materials

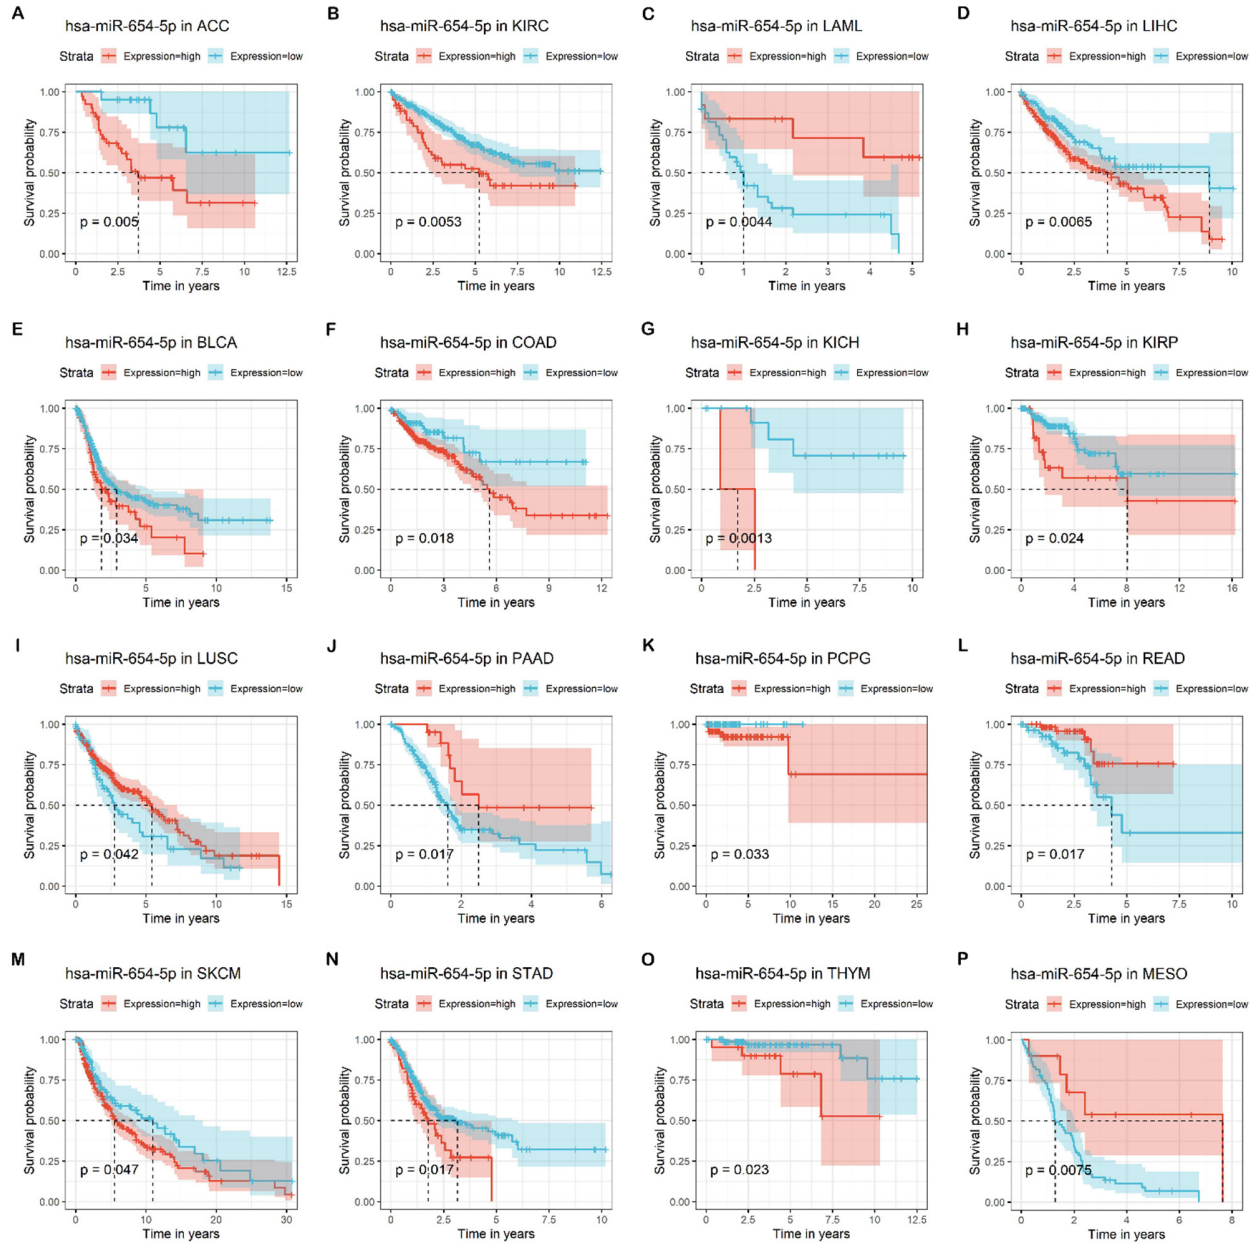

**Figure S1. Survival analysis of hsa-miR-654-5p in the pan-cancer dataset.**

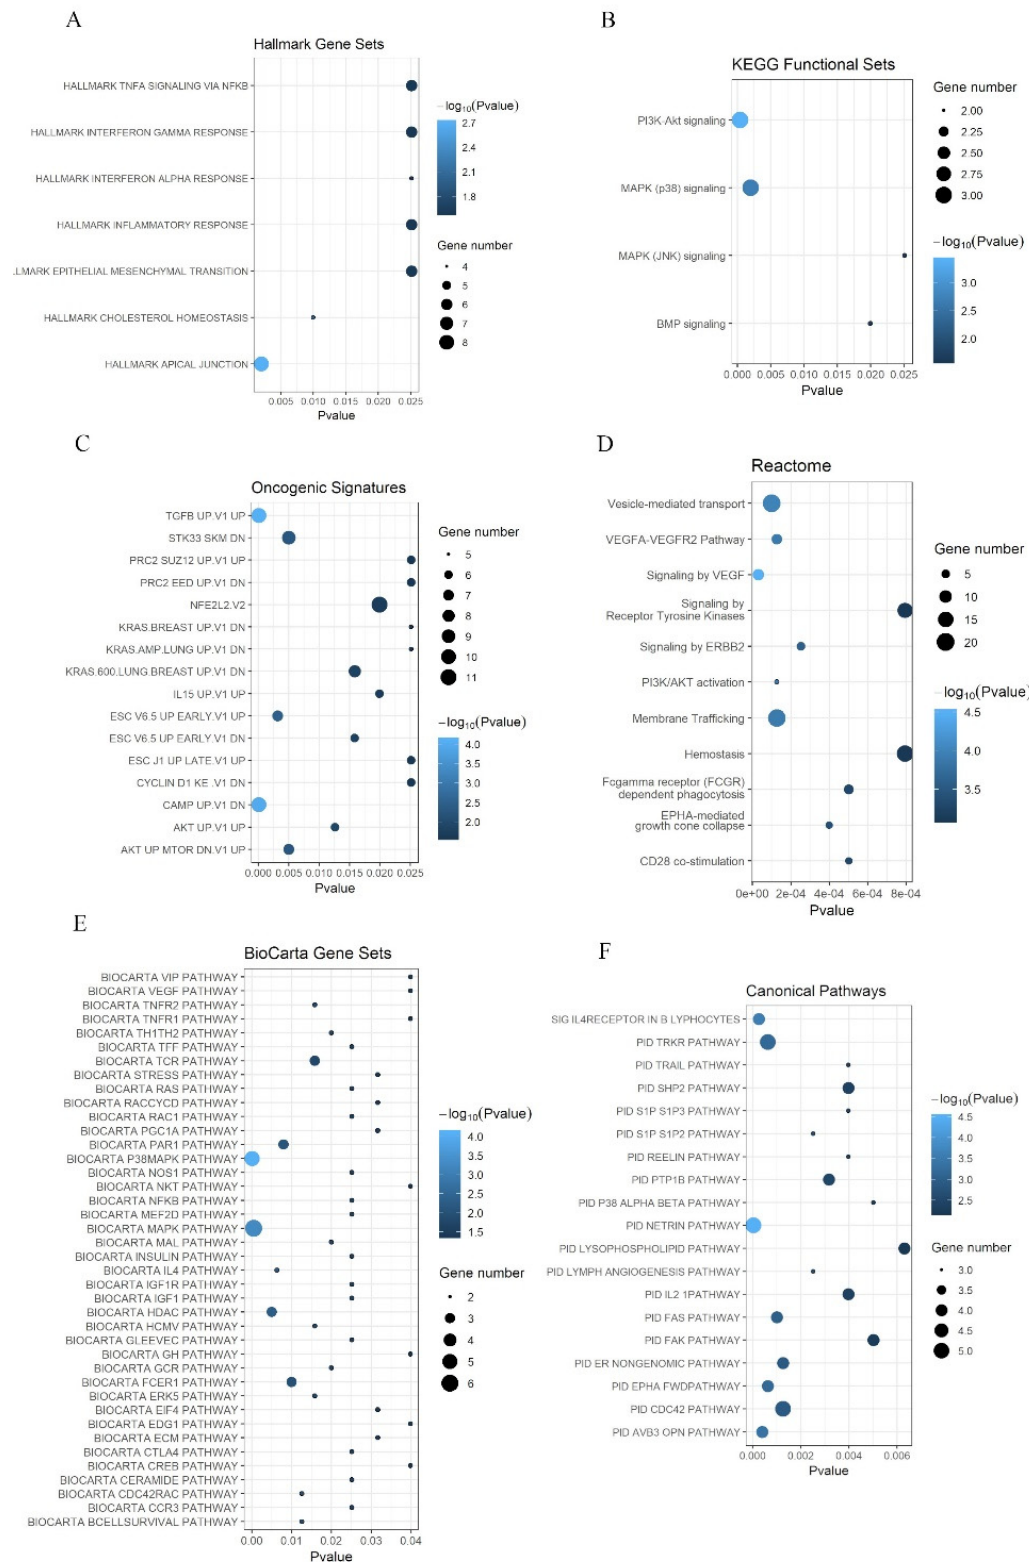

**Figure S2. enrichment analysis of 275 overlapping predicted targets of miR-622.** the 275 predicted genes of miR-654-5p were chosen to perform Hallmark, KEGG functional sets, Oncogenic signatures, Reactome, BioCarta and Canonical pathway enrichment analysis. Each bubble represents

## Comprehensive analysis of hsa-miR-654-5p

a term, and its size represent the counts of involved genes. Lighter colors indicate smaller P values. (A) enriched items for hallmark gene sets ( $p < 0.05$ ). (B) enriched items for KEGG functional sets ( $p < 0.05$ ). (C) enriched items for Oncogenic signatures ( $p < 0.05$ ). (D) enriched items for Reactome ( $p < 0.001$ ). (E) enriched items for BioCarta Gene Sets ( $p < 0.05$ ). (F) enriched items for Canonical Pathways ( $p < 0.01$ )<sup>1, 2</sup>.

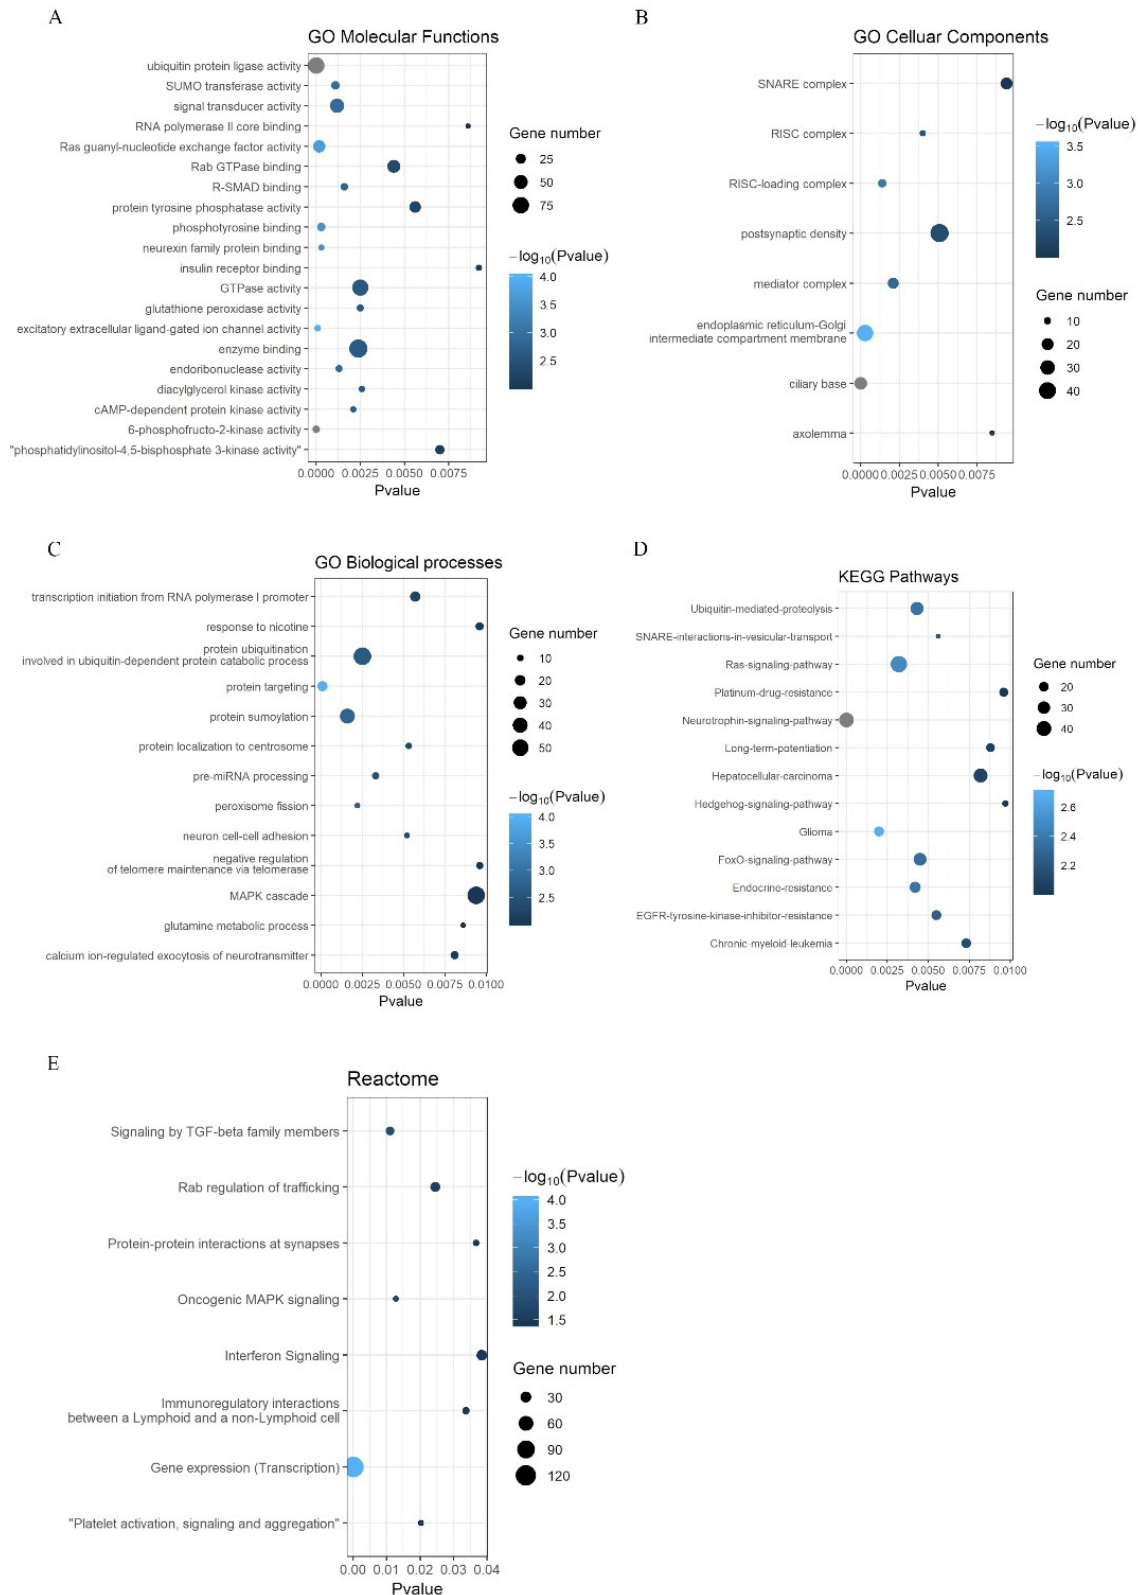

**Figure S3. Gene ontology and KEGG pathway enrichment analysis of predicted targets of miR-654-5p by miRWalks3.0.** the predicted genes (score>0.95) of miR-654-5p by new version 3.0 of miRWalks were all chosen to perform GO annotation and KEGG pathway enrichment analysis

## Comprehensive analysis of hsa-miR-654-5p

results to . Each bubble represents an enriched term, its size represents the counts of involved genes. Lighter colors indicate smaller P values. (A) Enriched terms of GO molecular functions. (B) Enriched terms of GO cellular compounds. (C) Enriched terms of GO biological processes. (D) Enriched terms of KEGG pathway. (E) Enriched terms of Reactome.

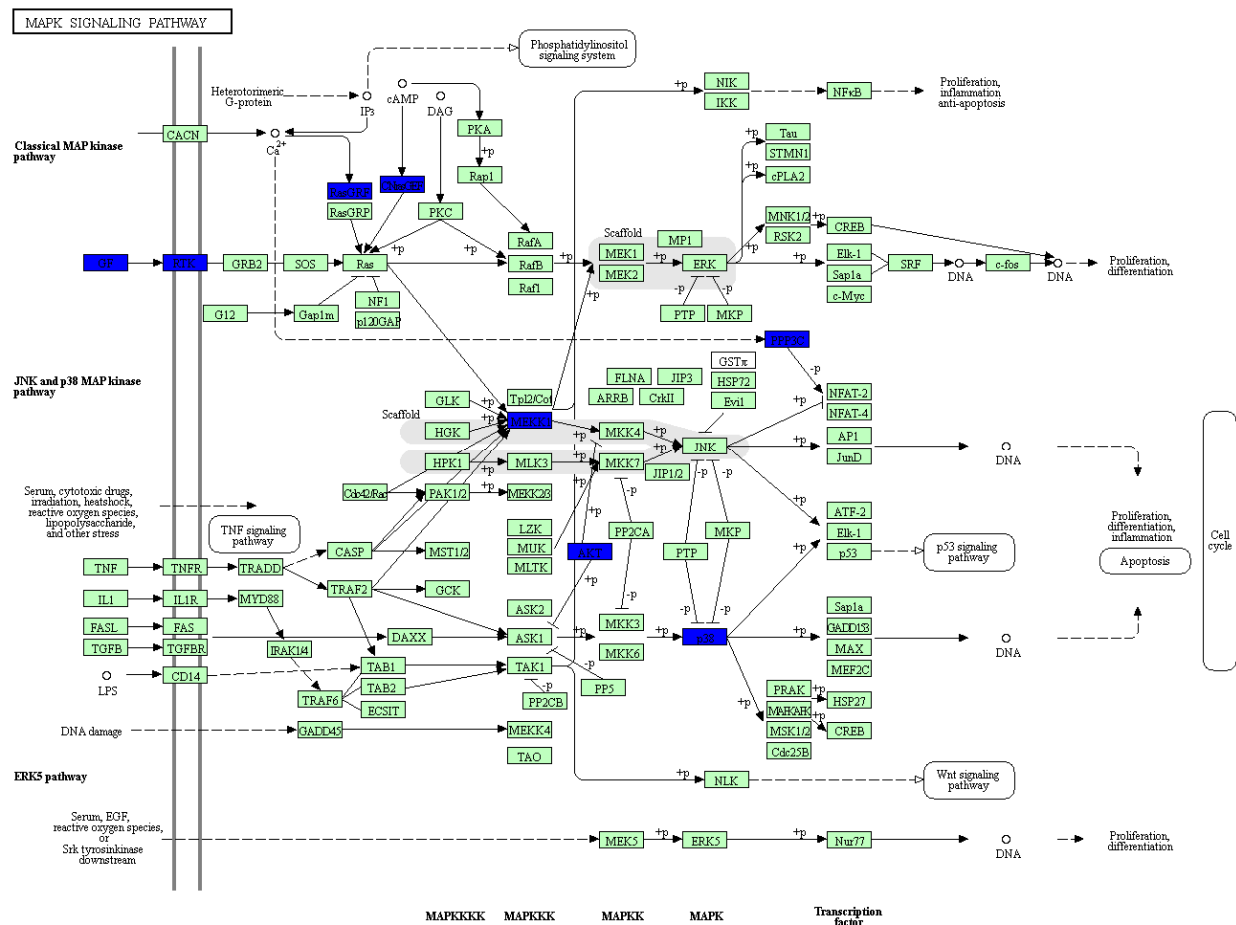

**Figure S4. The inhibitory influence of miR-654-5p on MAPK pathway in *Homo sapiens*.** the 275 predicted genes of miR-654-5p were mapped to KEGG pathway. Genes regulated by miR-654-5p were colored in blue.

## Comprehensive analysis of hsa-miR-654-5p

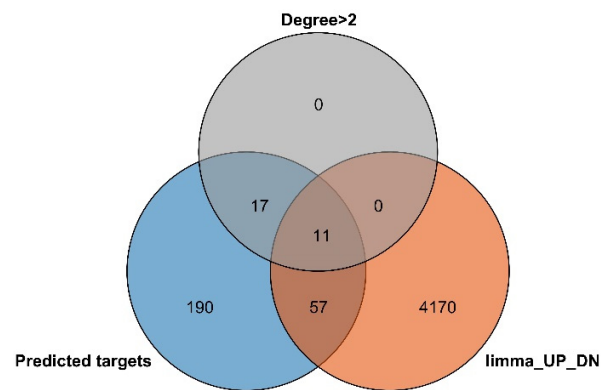

**Figure S5. The hub genes of miR-654-5p in LUAD.** 275 predicted genes were screened by the criterion of high connection in PPI network (Degree>2) and differential expressing (by R package limma with corrected p-value<0.05) in TCGA LUAD database<sup>3</sup>.



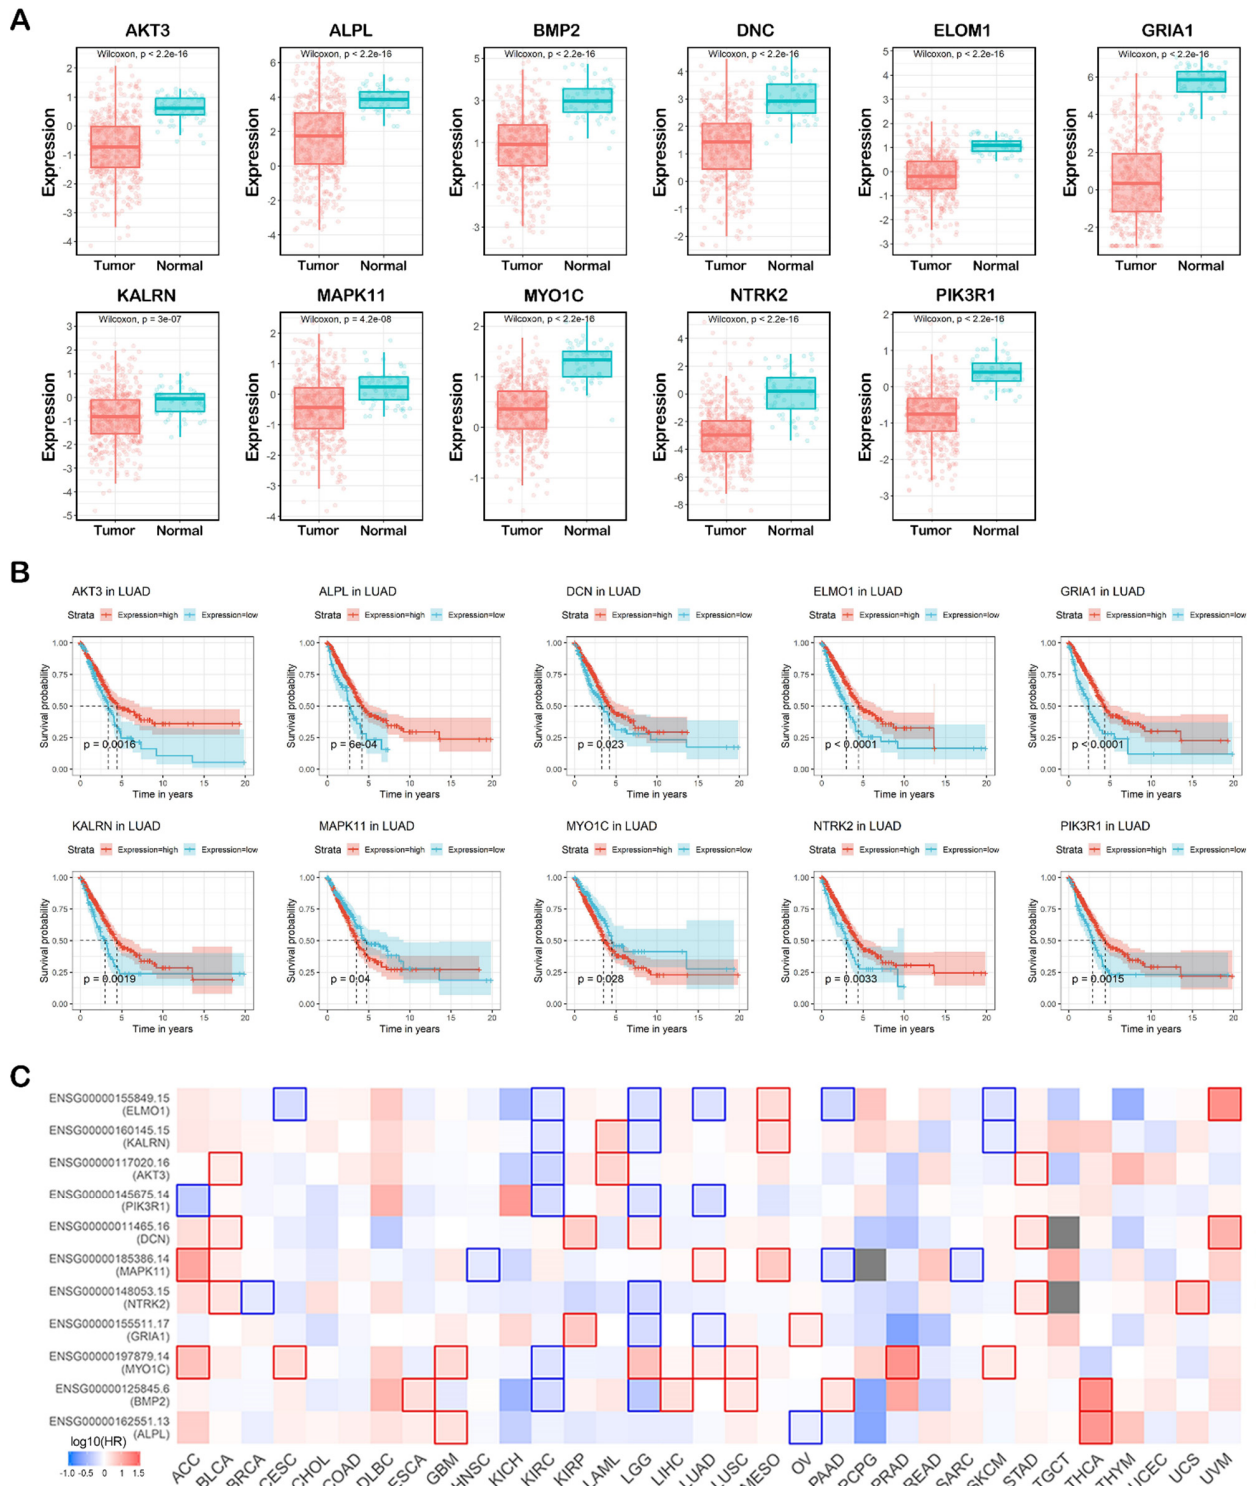

**Figure S6. The expression and prognostic analysis of 11 hub targets in cancers (A)** The differential expression analyses of hub genes in LUAD were based on pan-cancer batch effect normalized TCGA samples, Wilcoxon test was used to compare the mean between the cancer group and the normal tissue group. **(B)** The OS rate correlated with 11 hub targets by Kaplan-Meier survival analysis based on the TCGA LUAD database. A log rank  $p < 0.05$  was considered to indicate a statistically significant difference. Those with  $p > 0.05$  are not shown. **(C)** The heatmap of the pan-cancer OS rate of 11 hub targets by Kaplan-Meier survival



### **Comprehensive analysis of hsa-miR-654-5p**

analysis based on TCGA samples by GEPIA. A log rank  $p < 0.05$  was considered to indicate a statistically significant difference and are framed in red (positively correlated) or blue (negatively correlated).

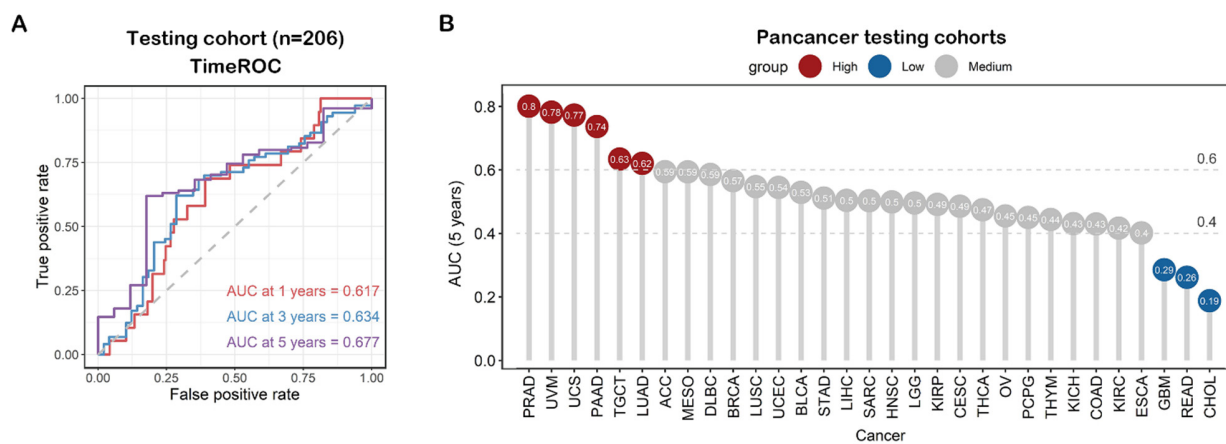

**Figure S7.** The performance of the risk score model. (A) ROC curve showing the model performance in testing cohort. (B) The risk score model was applied to Pan-cancer mRNA dataset.

**Table S1. The abbreviation of TCGA names**

| <b>Abbr</b> | <b>Full name</b>                                                 | <b>Samples(n=)</b> |
|-------------|------------------------------------------------------------------|--------------------|
| BLCA        | Bladder Urothelial Carcinoma                                     | 436                |
| BRCA        | Breast invasive carcinoma                                        | 1236               |
| CESC        | Cervical squamous cell carcinoma and endocervical adenocarcinoma | 312                |
| CHOL        | Cholangiocarcinoma                                               | 45                 |
| COAD        | Colon adenocarcinoma                                             | 545                |
| DLBC        | Lymphoid Neoplasm Diffuse Large B-cell Lymphoma                  | 48                 |
| ESCA        | Esophageal carcinoma                                             | 204                |
| GBM         | Glioblastoma multiforme                                          | 602                |
| HNSC        | Head and Neck squamous cell carcinoma                            | 604                |
| KICH        | Kidney Chromophobe                                               | 91                 |
| KIRC        | Kidney renal clear cell carcinoma                                | 944                |
| KIRP        | Kidney renal papillary cell carcinoma                            | 352                |
| LAML        | Acute Myeloid Leukemia                                           | 200                |
| LGG         | Brain Lower Grade Glioma                                         | 529                |
| LIHC        | Liver hepatocellular carcinoma                                   | 438                |
| LUAD        | Lung adenocarcinoma                                              | 641                |
| LUSC        | Lung squamous cell carcinoma                                     | 623                |
| MESO        | Mesothelioma                                                     | 87                 |
| OV          | Ovarian serous cystadenocarcinoma                                | 604                |
| PAAD        | Pancreatic adenocarcinoma                                        | 196                |
| PCPG        | Pheochromocytoma and Paraganglioma                               | 187                |
| PRAD        | Prostate adenocarcinoma                                          | 566                |
| READ        | Rectum adenocarcinoma                                            | 183                |
| SARC        | Sarcoma                                                          | 271                |
| SKCM        | Skin Cutaneous Melanoma                                          | 479                |
| STAD        | Stomach adenocarcinoma                                           | 511                |
| TGCT        | Testicular Germ Cell Tumors                                      | 139                |
| THCA        | Thyroid carcinoma                                                | 580                |
| THYM        | Thymoma                                                          | 126                |
| UCEC        | Uterine Corpus Endometrial Carcinoma                             | 583                |
| UCS         | Uterine Carcinosarcoma                                           | 57                 |
| UVM         | Uveal Melanoma                                                   | 80                 |

**Table S2. The identification of key targets of miR-654-5p in various cancers.**

| <b>ACC</b>        | <b>BLCA</b>                                | <b>BRCA</b>                    | <b>CESC</b>              | <b>COAD</b>              | <b>DLBC</b>             | <b>ESCA</b>             |
|-------------------|--------------------------------------------|--------------------------------|--------------------------|--------------------------|-------------------------|-------------------------|
| ASF1B             | ATP8B2                                     | -                              | PEAR1                    | -                        | POLR2F                  | ATF3<br>GNL3L<br>ANGPT2 |
| <b>GBM</b>        | <b>HNSC</b>                                | <b>KICH</b>                    | <b>KIRC</b>              | <b>KIRP</b>              | <b>LAML</b>             | <b>LGG</b>              |
| MYO1C<br>TMEM150A | -                                          | -                              | -                        | NRN1<br>MFAP4            | RNF8<br>MRPL49<br>ASF1B | MAP3K1<br>PBX3          |
| <b>LIHC</b>       | <b>LUAD</b>                                | <b>LUSC</b>                    | <b>OV</b>                | <b>PAAD</b>              | <b>PRAD</b>             | <b>READ</b>             |
| -                 | PPT2<br>PIK3R1                             | CADM3<br>BMP2<br>FLT4<br>ASF1B | ALPL<br>GALNT10<br>PEAR1 | ATP8B2<br>AP3S1<br>ASF1B | -                       | ZNF493<br>NICN1         |
| <b>SKCM</b>       | <b>STAD</b>                                | <b>TGCT</b>                    | <b>THCA</b>              | <b>THYM</b>              | <b>UCEC</b>             | <b>UCS</b>              |
| -                 | EFNA3<br>HIF3A<br>AFF3<br>UBE2QL1<br>ASF1B | PEAR1<br>ZNF385B               | -                        | SLC7A6<br>HDAC7          | PEAR1                   | SYT13                   |

## Reference

1. Ai C, Kong L. CGPS: A machine learning-based approach integrating multiple gene set analysis tools for better prioritization of biologically relevant pathways. *J Genet Genomics* 2018;45:489-504.
2. Xie C, Mao X, Huang J, Ding Y, Wu J, Dong S, Kong L, Gao G, Li CY, Wei L. KOBAS 2.0: a web server for annotation and identification of enriched pathways and diseases. *Nucleic Acids Res* 2011;39:W316-22.
3. Tang Z, Kang B, Li C, Chen T, Zhang Z. GEPIA2: an enhanced web server for large-scale expression profiling and interactive analysis. *Nucleic Acids Res* 2019.
