# Supplementary material for: Comprehensive Analysis of hsa-miR-654-5p’s Tumor-Suppressing Functions
Source: Int J Mol Sci. 2022 Jun 8;23(12):6411. doi: 10.3390/ijms23126411 (PMC9224266; doi:10.3390/ijms23126411)
Supplement: Supplementary file 1 [file ijms-23-06411-s001.zip]

Archive with 4 entries (4 files):
- Supp. Info. 1 IJMS_R2.pdf
- Supp. Info. 2_RNF8_predicted_miRNAs.xlsx
- Supp. Info. 3_654-predicted-Targets.xlsx
- Supp. Info. 4_275 genes_R2.xlsx
