# Supplementary material for: Comprehensive Analysis of hsa-miR-654-5p’s Tumor-Suppressing Functions
Source: Int J Mol Sci. 2022 Jun 8;23(12):6411. doi: 10.3390/ijms23126411 (PMC9224266; doi:10.3390/ijms23126411)
Supplement: Supplementary file 1 [file ijms-23-06411-s001.zip › Supp. Info. 2_RNF8_predicted_miRNAs.xlsx]

## Sheet: Sheet1
miRWalks	TargetScan	RNA22	miRanda
hsa-miR-4268	hsa-miR-181c-5p	hsa-let-7a-2-3p	hsa-miR-511
hsa-miR-645	hsa-miR-181d-5p	hsa-let-7a-5p	hsa-miR-3065-5p
hsa-miR-6757-5p	hsa-miR-181a-5p	hsa-let-7b-5p	hsa-miR-3180-5p
hsa-miR-143-5p	hsa-miR-181b-5p	hsa-let-7c-3p	hsa-miR-1252
hsa-miR-378a-3p	hsa-miR-4262	hsa-let-7c-5p	hsa-miR-449c
hsa-miR-518c-5p	hsa-miR-361-5p	hsa-let-7d-5p	hsa-miR-4261
hsa-miR-766-3p	hsa-miR-24-3p	hsa-let-7e-3p	hsa-miR-3163
hsa-miR-760	hsa-miR-495-3p	hsa-let-7e-5p	hsa-miR-34b*
hsa-miR-940	hsa-miR-5688	hsa-let-7f-1-3p	hsa-miR-27a
hsa-miR-1207-5p	hsa-miR-3064-5p	hsa-let-7f-2-3p	hsa-miR-27b
hsa-miR-1261	hsa-miR-6504-5p	hsa-let-7f-5p	hsa-miR-4273
hsa-miR-1321	hsa-miR-129-2-3p	hsa-let-7g-3p	hsa-miR-138
hsa-miR-1976	hsa-miR-129-1-3p	hsa-let-7g-5p	hsa-miR-2117
hsa-miR-2277-5p	hsa-miR-365a-3p	hsa-let-7i-3p	hsa-miR-26a-2*
hsa-miR-3121-3p	hsa-miR-365b-3p	hsa-let-7i-5p	hsa-miR-3190-3p
hsa-miR-3199	hsa-miR-7853-5p	hsa-miR-100-3p	hsa-miR-1297
hsa-miR-4306	hsa-miR-105-5p	hsa-miR-101-3p	hsa-miR-26a
hsa-miR-3622b-5p	hsa-miR-607	hsa-miR-101-5p	hsa-miR-26b
hsa-miR-3650	hsa-miR-3671	hsa-miR-103a-2-5p	hsa-miR-144
hsa-miR-4458	hsa-miR-6830-3p	hsa-miR-103a-3p	hsa-miR-548m
hsa-miR-4493	hsa-miR-548au-3p	hsa-miR-103b	hsa-miR-4272
hsa-miR-4633-5p	hsa-miR-34c-5p	hsa-miR-105-3p	hsa-miR-1233
hsa-miR-4649-5p	hsa-miR-449b-5p	hsa-miR-105-5p	hsa-miR-3128
hsa-miR-4658	hsa-miR-34a-5p	hsa-miR-106a-3p	hsa-miR-1284
hsa-miR-4667-5p	hsa-miR-449a	hsa-miR-106a-5p	hsa-miR-1184
hsa-miR-1343-3p	hsa-miR-6868-5p	hsa-miR-106b-3p	hsa-miR-558
hsa-miR-4697-3p	hsa-miR-221-5p	hsa-miR-106b-5p	hsa-miR-3119
hsa-miR-4728-5p	hsa-miR-8073	hsa-miR-107	hsa-miR-488*
hsa-miR-4793-5p	hsa-miR-619-3p	hsa-miR-10b-5p	hsa-miR-2115*
hsa-miR-6511a-3p	hsa-miR-7851-3p	hsa-miR-1178-5p	hsa-miR-452*
hsa-miR-6827-5p	hsa-miR-4999-3p	hsa-miR-1179	hsa-miR-1248
hsa-miR-6866-5p	hsa-miR-106b-3p	hsa-miR-1180-3p	hsa-miR-30c-2*
hsa-miR-7110-5p	hsa-miR-484	hsa-miR-1182	hsa-miR-409-3p
hsa-miR-1273h-3p	hsa-miR-3155a	hsa-miR-1183	hsa-miR-889
hsa-miR-12119	hsa-miR-3155b	hsa-miR-1184	hsa-miR-4262
hsa-miR-942-5p	hsa-miR-3664-3p	hsa-miR-1185-1-3p	hsa-miR-1264
hsa-miR-6895-3p	hsa-miR-4518	hsa-miR-1185-2-3p	hsa-miR-3137
hsa-miR-1224-5p	hsa-miR-1266-5p	hsa-miR-1185-5p	hsa-miR-3127
hsa-miR-1539	hsa-miR-6502-3p	hsa-miR-1193	hsa-miR-7-2*
hsa-miR-122b-3p	hsa-miR-6792-3p	hsa-miR-1197	hsa-miR-7-1*
hsa-miR-4763-3p	hsa-miR-4691-5p	hsa-miR-1199-3p	hsa-miR-744*
hsa-miR-4786-5p	hsa-miR-3123	hsa-miR-1200	hsa-miR-888
hsa-miR-5698	hsa-miR-6856-5p	hsa-miR-1202	hsa-miR-181a
hsa-miR-6801-5p	hsa-miR-6758-5p	hsa-miR-1203	hsa-miR-181b
hsa-miR-6826-5p	hsa-miR-7846-3p	hsa-miR-1204	hsa-miR-181c
hsa-miR-185-3p	hsa-miR-503-5p	hsa-miR-1205	hsa-miR-122*
hsa-miR-532-3p	hsa-miR-2278	hsa-miR-1206	hsa-miR-3074
hsa-miR-6085	hsa-miR-6501-3p	hsa-miR-1207-3p	hsa-miR-2052
hsa-miR-188-5p	hsa-miR-6759-3p	hsa-miR-1207-5p	hsa-miR-181d
hsa-let-7b-3p	hsa-miR-192-5p	hsa-miR-1208	hsa-miR-518c*
hsa-let-7d-3p	hsa-miR-215-5p	hsa-miR-1224-5p	hsa-miR-103
hsa-let-7e-5p	hsa-miR-4797-3p	hsa-miR-1225-3p	hsa-miR-107
hsa-let-7f-1-3p	hsa-miR-4264	hsa-miR-1225-5p	hsa-miR-589*
hsa-miR-17-3p	hsa-miR-6505-3p	hsa-miR-1226-3p	hsa-miR-4317
hsa-miR-22-3p	hsa-miR-8087	hsa-miR-1226-5p	hsa-miR-802
hsa-miR-25-5p	hsa-miR-188-3p	hsa-miR-1227-5p	hsa-miR-361-5p
hsa-miR-26b-3p	hsa-miR-4433a-5p	hsa-miR-1228-5p	hsa-miR-127-5p
hsa-miR-92a-2-5p	hsa-miR-6769b-3p	hsa-miR-1229-3p	hsa-miR-513c
hsa-miR-101-5p	hsa-miR-4433b-5p	hsa-miR-1229-5p	hsa-miR-19a
hsa-miR-29b-2-5p	hsa-miR-593-3p	hsa-miR-122-5p	hsa-miR-19b
hsa-miR-103a-3p	hsa-miR-3184-3p	hsa-miR-1231	hsa-miR-543
hsa-miR-107	hsa-miR-6750-3p	hsa-miR-1233-3p	hsa-miR-190b
hsa-miR-196a-5p	hsa-miR-7162-5p	hsa-miR-1233-5p	hsa-miR-190
hsa-miR-197-5p	hsa-miR-516b-3p	hsa-miR-1236-3p	hsa-miR-105
hsa-miR-198	hsa-miR-516a-3p	hsa-miR-1236-5p	hsa-miR-384
hsa-miR-7-1-3p	hsa-miR-3158-3p	hsa-miR-1237-3p	hsa-miR-888*
hsa-miR-34a-5p	hsa-miR-4721	hsa-miR-1237-5p	hsa-miR-1270
hsa-miR-181c-5p	hsa-miR-1226-5p	hsa-miR-1238-3p	hsa-miR-654-3p
hsa-miR-204-3p	hsa-miR-3616-3p	hsa-miR-1238-5p	hsa-miR-2110
hsa-miR-210-3p	hsa-miR-6857-3p	hsa-miR-1243	hsa-miR-548w
hsa-miR-211-3p	hsa-miR-6855-3p	hsa-miR-1244	hsa-miR-24-1*
hsa-miR-212-3p	hsa-miR-4513	hsa-miR-1247-5p	hsa-miR-605
hsa-miR-214-3p	hsa-miR-3136-5p	hsa-miR-1248	hsa-miR-24-2*
hsa-miR-215-3p	hsa-miR-4439	hsa-miR-1249-5p	hsa-miR-1206
hsa-miR-216a-3p	hsa-miR-134-5p	hsa-miR-124-3p	hsa-miR-3192
hsa-miR-217-5p	hsa-miR-3118	hsa-miR-124-5p	hsa-miR-1283
hsa-miR-200b-5p	hsa-miR-605-3p	hsa-miR-1250-3p	hsa-miR-577
hsa-let-7i-3p	hsa-miR-4533	hsa-miR-1250-5p	hsa-miR-34c-5p
hsa-miR-15b-5p	hsa-miR-3202	hsa-miR-1251-3p	hsa-miR-484
hsa-miR-30b-3p	hsa-miR-3190-3p	hsa-miR-1251-5p	hsa-miR-1277
hsa-miR-125b-1-3p	hsa-miR-588	hsa-miR-1253	hsa-miR-485-5p
hsa-miR-132-3p	hsa-miR-4701-5p	hsa-miR-1254	hsa-miR-3155
hsa-miR-135a-3p	hsa-miR-3190-5p	hsa-miR-1255a	hsa-miR-411
hsa-miR-191-5p	hsa-miR-4498	hsa-miR-1255b-2-3	hsa-miR-143
hsa-miR-127-3p	hsa-miR-4492	hsa-miR-1255b-5p	hsa-miR-4311
hsa-miR-146a-3p	hsa-miR-5001-5p	hsa-miR-1256	hsa-miR-146a*
hsa-miR-149-3p	hsa-miR-762	hsa-miR-1257	hsa-miR-4298
hsa-miR-150-5p	hsa-miR-4446-3p	hsa-miR-1258	hsa-miR-338-5p
hsa-miR-150-3p	hsa-miR-6836-5p	hsa-miR-125a-3p	hsa-miR-556-5p
hsa-miR-186-5p	hsa-miR-6132	hsa-miR-125a-5p	hsa-miR-1205
hsa-miR-194-3p	hsa-miR-6510-5p	hsa-miR-125b-1-3p	hsa-miR-124*
hsa-miR-30c-1-3p	hsa-miR-3619-5p	hsa-miR-125b-2-3p	hsa-miR-542-3p
hsa-miR-299-3p	hsa-miR-761	hsa-miR-125b-5p	hsa-miR-494
hsa-miR-361-5p	hsa-miR-214-3p	hsa-miR-1260a	hsa-miR-2054
hsa-miR-363-5p	hsa-miR-885-3p	hsa-miR-1260b	hsa-miR-3140
hsa-miR-365b-5p	hsa-miR-1272	hsa-miR-1261	hsa-miR-625*
hsa-miR-367-5p	hsa-miR-3157-5p	hsa-miR-1262	hsa-miR-146a
hsa-miR-376c-5p	hsa-miR-4691-3p	hsa-miR-1263	hsa-miR-146b-5p
hsa-miR-376a-5p	hsa-miR-3977	hsa-miR-1264	hsa-miR-548n
hsa-miR-376a-3p	hsa-miR-3907	hsa-miR-1265	hsa-miR-607
hsa-miR-378a-5p	hsa-miR-323a-5p	hsa-miR-1266-3p	hsa-miR-379*
hsa-miR-382-5p	hsa-miR-876-3p	hsa-miR-1266-5p	hsa-miR-3133
hsa-miR-383-3p	hsa-miR-4456	hsa-miR-1267	hsa-miR-942
hsa-miR-340-3p	hsa-miR-6741-5p	hsa-miR-1268a	hsa-miR-10b*
hsa-miR-330-5p	hsa-miR-4701-3p	hsa-miR-1268b	hsa-miR-550*
hsa-miR-328-5p	hsa-miR-6736-5p	hsa-miR-1269a	hsa-miR-2053
hsa-miR-151a-5p	hsa-miR-1262	hsa-miR-1269b	hsa-miR-3121
hsa-miR-135b-5p	hsa-miR-4259	hsa-miR-1270	hsa-miR-938
hsa-miR-135b-3p	hsa-miR-345-3p	hsa-miR-1271-3p	hsa-miR-589
hsa-miR-345-5p	hsa-miR-504-5p.1	hsa-miR-1271-5p	hsa-miR-613
hsa-miR-345-3p	hsa-miR-10a-5p	hsa-miR-1272	hsa-miR-1827
hsa-miR-423-5p	hsa-miR-10b-5p	hsa-miR-1273a	hsa-miR-30b*
hsa-miR-20b-5p	hsa-miR-5585-5p	hsa-miR-1273c	hsa-miR-30c-1*
hsa-miR-448	hsa-miR-5007-5p	hsa-miR-1273e	hsa-miR-630
hsa-miR-433-5p	hsa-miR-6511a-5p	hsa-miR-1273f	hsa-miR-1826
hsa-miR-409-3p	hsa-miR-1910-3p	hsa-miR-1273g-3p	hsa-miR-206
hsa-miR-376b-5p	hsa-miR-1827	hsa-miR-1273g-5p	hsa-miR-1
hsa-miR-376b-3p	hsa-miR-4316	hsa-miR-1273h-3p	hsa-miR-514b-5p
hsa-miR-483-5p	hsa-miR-3174	hsa-miR-1273h-5p	hsa-miR-647
hsa-miR-485-5p	hsa-miR-921	hsa-miR-1275	hsa-miR-1271
hsa-miR-488-5p	hsa-miR-6073	hsa-miR-1276	hsa-miR-298
hsa-miR-490-3p	hsa-miR-142-3p.1	hsa-miR-1279	hsa-miR-625
hsa-miR-491-5p	hsa-miR-7852-3p	hsa-miR-127-3p	hsa-miR-101
hsa-miR-202-3p	hsa-miR-130b-5p	hsa-miR-127-5p	hsa-miR-551b*
hsa-miR-432-5p	hsa-miR-618	hsa-miR-1281	hsa-miR-185
hsa-miR-497-5p	hsa-miR-372-5p	hsa-miR-1283	hsa-miR-4306
hsa-miR-512-3p	hsa-miR-888-5p	hsa-miR-1284	hsa-miR-609
hsa-miR-498-3p	hsa-miR-7153-5p	hsa-miR-1285-3p	hsa-miR-3138
hsa-miR-519c-5p	hsa-miR-146a-5p	hsa-miR-1285-5p	hsa-miR-495
hsa-miR-519b-5p	hsa-miR-146b-5p	hsa-miR-1286	hsa-miR-96
hsa-miR-525-5p	hsa-miR-3925-5p	hsa-miR-1287-3p	hsa-miR-622
hsa-miR-525-3p	hsa-miR-5197-3p	hsa-miR-1287-5p	hsa-miR-223
hsa-miR-523-5p	hsa-miR-7-2-3p	hsa-miR-1288-3p	hsa-miR-129*
hsa-miR-520b-5p	hsa-miR-7-1-3p	hsa-miR-1288-5p	hsa-miR-129-3p
hsa-miR-526a-5p	hsa-miR-3065-5p	hsa-miR-1289	hsa-miR-4310
hsa-miR-526a-3p	hsa-miR-3529-3p	hsa-miR-128-1-5p	hsa-miR-559
hsa-miR-520c-5p	hsa-miR-802	hsa-miR-128-2-5p	hsa-miR-382
hsa-miR-517-5p	hsa-miR-548o-3p	hsa-miR-128-3p	hsa-miR-548c-5p
hsa-miR-518e-5p	hsa-miR-1323	hsa-miR-1290	hsa-miR-548h
hsa-miR-518d-5p	hsa-miR-202-3p	hsa-miR-1291	hsa-miR-548j
hsa-miR-522-5p	hsa-miR-6851-5p	hsa-miR-1292-5p	hsa-miR-217
hsa-miR-519a-5p	hsa-miR-3689d	hsa-miR-1293	hsa-miR-548i
hsa-miR-519a-3p	hsa-miR-95-3p	hsa-miR-1294	hsa-miR-548b-5p
hsa-miR-519a-2-5p	hsa-miR-505-3p.1	hsa-miR-1295a	hsa-miR-548d-5p
hsa-miR-450a-2-3p	hsa-miR-4714-3p	hsa-miR-1295b-3p	hsa-miR-3202
hsa-miR-505-5p	hsa-miR-6881-5p	hsa-miR-1295b-5p	hsa-miR-1303
hsa-miR-508-5p	hsa-miR-6890-5p	hsa-miR-1296-3p	hsa-miR-373*
hsa-miR-510-3p	hsa-miR-6801-5p	hsa-miR-1296-5p	hsa-miR-616*
hsa-miR-532-5p	hsa-miR-6847-5p	hsa-miR-1298-3p	hsa-miR-491-5p
hsa-miR-455-3p	hsa-miR-4257	hsa-miR-1298-5p	hsa-miR-761
hsa-miR-555	hsa-miR-5581-5p	hsa-miR-1299	hsa-miR-183*
hsa-miR-557	hsa-miR-4297	hsa-miR-129-1-3p	hsa-miR-214
hsa-miR-558	hsa-miR-6890-3p	hsa-miR-129-2-3p	hsa-miR-223*
hsa-miR-572	hsa-miR-3121-3p	hsa-miR-129-5p	hsa-miR-593
hsa-miR-574-5p	hsa-miR-8063	hsa-miR-1301-3p	hsa-miR-4283
hsa-miR-584-3p	hsa-miR-4698	hsa-miR-1301-5p	hsa-miR-508-5p
hsa-miR-548b-3p	hsa-miR-373-5p	hsa-miR-1302	hsa-miR-541
hsa-miR-588	hsa-miR-371b-5p	hsa-miR-1303	hsa-miR-129-5p
hsa-miR-550a-5p	hsa-miR-616-5p	hsa-miR-1304-3p	hsa-miR-182
hsa-miR-593-5p	hsa-miR-371a-5p	hsa-miR-1304-5p	hsa-miR-654-5p
hsa-miR-608	hsa-miR-7111-3p	hsa-miR-1305	hsa-miR-381
hsa-miR-611	hsa-miR-3183	hsa-miR-1307-3p	hsa-miR-3120
hsa-miR-621	hsa-miR-4723-3p	hsa-miR-130a-5p	hsa-miR-300
hsa-miR-622	hsa-miR-5196-3p	hsa-miR-130b-3p	hsa-miR-367*
hsa-miR-33b-3p	hsa-miR-4719	hsa-miR-130b-5p	hsa-miR-3145
hsa-miR-634	hsa-miR-513b-5p	hsa-miR-1321	hsa-miR-548a-5p
hsa-miR-637	hsa-miR-5096	hsa-miR-1322	hsa-miR-548v
hsa-miR-640	hsa-miR-1252-3p	hsa-miR-132-5p	hsa-miR-200a
hsa-miR-641	hsa-miR-5093	hsa-miR-133a-3p	hsa-miR-1301
hsa-miR-642a-3p	hsa-miR-665	hsa-miR-133a-5p	hsa-miR-141
hsa-miR-648	hsa-miR-3180-5p	hsa-miR-133b	hsa-miR-1254
hsa-miR-649	hsa-miR-329-5p	hsa-miR-1343-3p	hsa-miR-23b*
hsa-miR-652-5p	hsa-miR-3660	hsa-miR-1343-5p	hsa-miR-2113
hsa-miR-654-5p	hsa-miR-4526	hsa-miR-134-3p	hsa-miR-330-3p
hsa-miR-654-3p	hsa-miR-888-3p	hsa-miR-134-5p	hsa-miR-921
hsa-miR-656-5p	hsa-miR-4663	hsa-miR-135a-3p	hsa-miR-875-3p
hsa-miR-549a-3p	hsa-miR-4690-3p	hsa-miR-135b-3p	hsa-miR-34b
hsa-miR-542-5p	hsa-miR-548ag	hsa-miR-136-5p	hsa-miR-93
hsa-miR-671-5p	hsa-miR-548ba	hsa-miR-138-1-3p	hsa-miR-106a
hsa-miR-671-3p	hsa-miR-570-5p	hsa-miR-138-2-3p	hsa-miR-106b
hsa-miR-550a-3-5p	hsa-miR-548ai	hsa-miR-138-5p	hsa-miR-17
hsa-miR-1296-5p	hsa-miR-6876-5p	hsa-miR-139-3p	hsa-miR-496
hsa-miR-1301-3p	hsa-miR-4476	hsa-miR-139-5p	hsa-miR-200b
hsa-miR-449c-5p	hsa-miR-1252-5p	hsa-miR-140-3p	hsa-miR-200c
hsa-miR-769-3p	hsa-miR-5196-5p	hsa-miR-141-5p	hsa-miR-1972
hsa-miR-1298-3p	hsa-miR-4747-5p	hsa-miR-142-3p	hsa-miR-526b*
hsa-miR-2113	hsa-miR-9500	hsa-miR-142-5p	hsa-miR-519d
hsa-miR-761	hsa-miR-7515	hsa-miR-143-3p	hsa-miR-20a
hsa-miR-759	hsa-miR-873-5p.2	hsa-miR-143-5p	hsa-miR-20b
hsa-miR-765	hsa-miR-6165	hsa-miR-144-5p	hsa-miR-429
hsa-miR-770-5p	hsa-miR-6081	hsa-miR-145-3p	hsa-miR-18a
hsa-miR-891a-3p	hsa-miR-6090	hsa-miR-145-5p	hsa-miR-18b
hsa-miR-874-5p	hsa-miR-920	hsa-miR-1468-5p	hsa-miR-1276
hsa-miR-876-3p	hsa-miR-6827-5p	hsa-miR-1469	hsa-miR-524-5p
hsa-miR-744-5p	hsa-miR-6726-5p	hsa-miR-146a-3p	hsa-miR-520d-5p
hsa-miR-885-3p	hsa-miR-4300	hsa-miR-146a-5p	hsa-miR-509-3-5p
hsa-miR-877-3p	hsa-miR-5591-5p	hsa-miR-146b-3p	hsa-miR-548t
hsa-miR-887-5p	hsa-miR-3192-5p	hsa-miR-146b-5p	hsa-miR-1202
hsa-miR-920	hsa-miR-204-3p	hsa-miR-1471	hsa-miR-509-5p
hsa-miR-939-5p	hsa-miR-4646-5p	hsa-miR-147a	hsa-miR-3146
hsa-miR-1225-3p	hsa-miR-6506-5p	hsa-miR-147b	hsa-miR-16-1*
hsa-miR-1226-5p	hsa-miR-4314	hsa-miR-148b-3p	hsa-miR-196a*
hsa-miR-1226-3p	hsa-miR-619-5p	hsa-miR-149-3p	hsa-miR-4320
hsa-miR-1227-3p	hsa-miR-1231	hsa-miR-149-5p	hsa-miR-624
hsa-miR-1233-5p	hsa-miR-3120-5p	hsa-miR-150-3p	hsa-miR-125a-3p
hsa-miR-1236-5p	hsa-miR-873-3p	hsa-miR-150-5p	hsa-miR-4316
hsa-miR-1237-3p	hsa-miR-3672	hsa-miR-151a-3p	hsa-miR-939
hsa-miR-1202	hsa-miR-6864-3p	hsa-miR-152-3p	hsa-miR-935
hsa-miR-1203	hsa-miR-4694-5p	hsa-miR-152-5p	hsa-miR-302e
hsa-miR-1205	hsa-miR-7978	hsa-miR-1537-5p	hsa-miR-302a
hsa-miR-1208	hsa-miR-138-5p	hsa-miR-1538	hsa-miR-302b
hsa-miR-1285-3p	hsa-miR-133a-5p	hsa-miR-1539	hsa-miR-302c
hsa-miR-1287-5p	hsa-miR-6131	hsa-miR-153-5p	hsa-miR-302d
hsa-miR-1293	hsa-miR-3692-5p	hsa-miR-154-3p	hsa-miR-520a-3p
hsa-miR-1295a	hsa-miR-558	hsa-miR-154-5p	hsa-miR-520d-3p
hsa-miR-1303	hsa-miR-3160-3p	hsa-miR-1587	hsa-miR-520e
hsa-miR-1246	hsa-miR-4487	hsa-miR-15a-3p	hsa-miR-373
hsa-miR-1266-5p	hsa-miR-556-5p	hsa-miR-16-1-3p	hsa-miR-335
hsa-miR-1268a	hsa-miR-2054	hsa-miR-17-3p	hsa-miR-629*
hsa-miR-1270	hsa-miR-410-5p	hsa-miR-17-5p	hsa-miR-1255a
hsa-miR-1272	hsa-miR-323b-5p	hsa-miR-181a-5p	hsa-miR-1255b
hsa-miR-1275	hsa-miR-494-5p	hsa-miR-181b-2-3p	hsa-miR-31*
hsa-miR-1276	hsa-miR-578	hsa-miR-181b-3p	hsa-miR-372
hsa-miR-1288-3p	hsa-miR-4704-3p	hsa-miR-181b-5p	hsa-miR-520b
hsa-miR-664a-5p	hsa-miR-452-3p	hsa-miR-181c-5p	hsa-miR-520c-3p
hsa-miR-1306-3p	hsa-miR-136-3p	hsa-miR-181d-3p	hsa-miR-646
hsa-miR-513b-5p	hsa-miR-3616-5p	hsa-miR-181d-5p	hsa-miR-940
hsa-miR-1322	hsa-miR-573	hsa-miR-1825	hsa-miR-655
hsa-miR-1908-5p	hsa-miR-4635	hsa-miR-1827	hsa-miR-920
hsa-miR-1909-5p	hsa-miR-6500-3p	hsa-miR-182-3p	hsa-miR-1243
hsa-miR-1910-3p	hsa-miR-3614-5p	hsa-miR-182-5p	hsa-let-7a
hsa-miR-2114-3p	hsa-miR-6719-3p	hsa-miR-183-3p	hsa-let-7c
hsa-miR-2115-5p	hsa-miR-3929	hsa-miR-183-5p	hsa-let-7e
hsa-miR-2116-5p	hsa-miR-4419b	hsa-miR-184	hsa-miR-98
hsa-miR-2116-3p	hsa-miR-4478	hsa-miR-185-3p	hsa-miR-760
hsa-miR-2278	hsa-miR-2682-3p	hsa-miR-185-5p	hsa-let-7b
hsa-miR-3116	hsa-miR-6781-3p	hsa-miR-187-3p	hsa-let-7f
hsa-miR-3127-5p	hsa-miR-4757-5p	hsa-miR-187-5p	hsa-miR-130b*
hsa-miR-3128	hsa-miR-6744-3p	hsa-miR-188-3p	hsa-miR-582-5p
hsa-miR-3132	hsa-miR-6878-3p	hsa-miR-188-5p	hsa-miR-2115
hsa-miR-3136-3p	hsa-miR-4453	hsa-miR-18a-3p	hsa-miR-2116*
hsa-miR-548t-5p	hsa-miR-4538	hsa-miR-18a-5p	hsa-miR-3125
hsa-miR-3141	hsa-miR-1301-3p	hsa-miR-18b-3p	hsa-miR-4314
hsa-miR-3148	hsa-miR-5047	hsa-miR-18b-5p	hsa-miR-576-5p
hsa-miR-3151-5p	hsa-miR-4660	hsa-miR-1908-3p	hsa-miR-32*
hsa-miR-3154	hsa-miR-1184	hsa-miR-1908-5p	hsa-let-7d
hsa-miR-3155a	hsa-miR-17-3p	hsa-miR-1909-3p	hsa-let-7g
hsa-miR-3157-3p	hsa-miR-3158-5p	hsa-miR-1909-5p	hsa-let-7i
hsa-miR-3160-5p	hsa-miR-1205	hsa-miR-190b	hsa-miR-191*
hsa-miR-3162-5p	hsa-miR-3064-3p	hsa-miR-1910-3p	hsa-miR-4289
hsa-miR-3173-3p	hsa-miR-4715-3p	hsa-miR-1910-5p	hsa-miR-619
hsa-miR-3174	hsa-miR-6501-5p	hsa-miR-1911-5p	hsa-miR-1975
hsa-miR-3180-3p	hsa-miR-744-3p	hsa-miR-1913	hsa-miR-363*
hsa-miR-3186-5p	hsa-miR-4423-5p	hsa-miR-1914-3p	hsa-miR-520f
hsa-miR-3186-3p	hsa-miR-367-5p	hsa-miR-1914-5p	hsa-miR-150*
hsa-miR-3189-3p	hsa-miR-1267	hsa-miR-1915-3p	hsa-miR-192
hsa-miR-320e	hsa-miR-3670	hsa-miR-1915-5p	hsa-miR-215
hsa-miR-3190-3p	hsa-miR-655-5p	hsa-miR-191-3p	hsa-miR-2276
hsa-miR-3191-3p	hsa-miR-4459	hsa-miR-192-3p	hsa-miR-1910
hsa-miR-3192-5p	hsa-miR-4768-3p	hsa-miR-192-5p	hsa-miR-568
hsa-miR-3194-3p	hsa-miR-4433a-3p	hsa-miR-193a-5p	hsa-miR-181a-2*
hsa-miR-3196	hsa-miR-4261	hsa-miR-193b-3p	hsa-miR-519e*
hsa-miR-3197	hsa-miR-4496	hsa-miR-193b-5p	hsa-miR-1231
hsa-miR-3198	hsa-miR-651-3p	hsa-miR-194-3p	hsa-miR-4277
hsa-miR-514b-5p	hsa-miR-3607-3p	hsa-miR-194-5p	hsa-miR-515-5p
hsa-miR-3202	hsa-miR-3686	hsa-miR-195-5p	hsa-miR-423-5p
hsa-miR-4296	hsa-miR-1224-3p	hsa-miR-196a-3p	hsa-miR-3184
hsa-miR-4294	hsa-miR-7114-3p	hsa-miR-196a-5p	hsa-miR-137
hsa-miR-4304	hsa-miR-1180-5p	hsa-miR-196b-5p	hsa-miR-365
hsa-miR-4305	hsa-miR-7973	hsa-miR-1972	hsa-miR-2355
hsa-miR-4323	hsa-miR-5190	hsa-miR-1973	hsa-miR-509-3p
hsa-miR-4259	hsa-miR-30d-5p	hsa-miR-1976
hsa-miR-4326	hsa-miR-30a-5p	hsa-miR-197-5p
hsa-miR-4266	hsa-miR-30b-5p	hsa-miR-198
hsa-miR-4270	hsa-miR-30e-5p	hsa-miR-199a-3p
hsa-miR-4281	hsa-miR-30c-5p	hsa-miR-199a-5p
hsa-miR-4278	hsa-miR-624-3p	hsa-miR-199b-3p
hsa-miR-4283	hsa-miR-653-5p	hsa-miR-199b-5p
hsa-miR-4286	hsa-miR-494-3p	hsa-miR-19a-5p
hsa-miR-4290	hsa-miR-6892-3p	hsa-miR-19b-1-5p
hsa-miR-4330	hsa-miR-1260a	hsa-miR-19b-2-5p
hsa-miR-3605-5p	hsa-miR-1260b	hsa-miR-1-3p
hsa-miR-3616-3p	hsa-miR-532-3p	hsa-miR-200a-5p
hsa-miR-3619-5p	hsa-miR-2116-3p	hsa-miR-200b-5p
hsa-miR-3621	hsa-miR-4713-5p	hsa-miR-200c-5p
hsa-miR-3622a-5p	hsa-miR-150-5p	hsa-miR-202-3p
hsa-miR-3646	hsa-miR-629-3p	hsa-miR-203a-5p
hsa-miR-3651	hsa-miR-6867-3p	hsa-miR-203b-3p
hsa-miR-3652	hsa-miR-1202	hsa-miR-203b-5p
hsa-miR-3654	hsa-miR-3972	hsa-miR-204-3p
hsa-miR-3657	hsa-miR-3194-5p	hsa-miR-204-5p
hsa-miR-3660	hsa-miR-543	hsa-miR-2052
hsa-miR-3666	hsa-miR-3978	hsa-miR-205-3p
hsa-miR-3667-3p	hsa-miR-3163	hsa-miR-205-5p
hsa-miR-3675-5p	hsa-miR-577	hsa-miR-206
hsa-miR-3678-3p	hsa-miR-4757-3p	hsa-miR-208a-5p
hsa-miR-3679-5p	hsa-miR-7154-5p	hsa-miR-208b-5p
hsa-miR-3691-5p	hsa-miR-433-3p	hsa-miR-20a-3p
hsa-miR-3692-3p	hsa-miR-1206	hsa-miR-20a-5p
hsa-miR-3180	hsa-miR-6853-3p	hsa-miR-20b-3p
hsa-miR-3907	hsa-miR-124-5p	hsa-miR-20b-5p
hsa-miR-3908	hsa-miR-6867-5p	hsa-miR-210-3p
hsa-miR-3911	hsa-miR-6811-3p	hsa-miR-210-5p
hsa-miR-3917	hsa-miR-6514-3p	hsa-miR-2110
hsa-miR-3918	hsa-miR-214-5p	hsa-miR-2113
hsa-miR-3927-5p	hsa-miR-6894-3p	hsa-miR-2114-3p
hsa-miR-3929	hsa-miR-4317	hsa-miR-2114-5p
hsa-miR-3934-3p	hsa-miR-4668-3p	hsa-miR-2115-5p
hsa-miR-3937	hsa-miR-6755-3p	hsa-miR-2116-3p
hsa-miR-3940-5p	hsa-miR-382-5p	hsa-miR-2116-5p
hsa-miR-3945	hsa-miR-6835-3p	hsa-miR-2117
hsa-miR-642b-3p	hsa-miR-548e-5p	hsa-miR-211-3p
hsa-miR-1268b	hsa-miR-3133	hsa-miR-211-5p
hsa-miR-4420	hsa-miR-186-5p	hsa-miR-212-5p
hsa-miR-4421	hsa-miR-4495	hsa-miR-214-5p
hsa-miR-378g	hsa-miR-576-5p	hsa-miR-215-3p
hsa-miR-4428	hsa-miR-5582-3p	hsa-miR-216a-3p
hsa-miR-4430	hsa-miR-4311	hsa-miR-217
hsa-miR-4433a-3p	hsa-miR-4434	hsa-miR-218-2-3p
hsa-miR-4435	hsa-miR-5703	hsa-miR-218-5p
hsa-miR-4436a	hsa-miR-4531	hsa-miR-219a-1-3p
hsa-miR-4437	hsa-miR-4516	hsa-miR-219a-2-3p
hsa-miR-4442	hsa-miR-6880-5p	hsa-miR-219b-3p
hsa-miR-4443	hsa-miR-6134	hsa-miR-219b-5p
hsa-miR-4456	hsa-miR-4428	hsa-miR-21-5p
hsa-miR-3135b	hsa-miR-548c-3p	hsa-miR-221-3p
hsa-miR-4462	hsa-miR-4282	hsa-miR-221-5p
hsa-miR-4465	hsa-miR-3613-3p	hsa-miR-222-3p
hsa-miR-4467	hsa-miR-7161-3p	hsa-miR-222-5p
hsa-miR-4468	hsa-miR-5100	hsa-miR-223-3p
hsa-miR-4474-3p	hsa-miR-1288-5p	hsa-miR-223-5p
hsa-miR-4476	hsa-miR-5702	hsa-miR-224-3p
hsa-miR-3689d	hsa-miR-4797-5p	hsa-miR-224-5p
hsa-miR-4487	hsa-miR-196a-3p	hsa-miR-2276-3p
hsa-miR-4494	hsa-miR-635	hsa-miR-2276-5p
hsa-miR-4499	hsa-miR-6774-5p	hsa-miR-2277-3p
hsa-miR-4505	hsa-miR-4267	hsa-miR-2277-5p
hsa-miR-4507	hsa-miR-766-3p	hsa-miR-2278
hsa-miR-4508	hsa-miR-508-5p	hsa-miR-22-3p
hsa-miR-4510	hsa-miR-3145-5p	hsa-miR-22-5p
hsa-miR-4512	hsa-miR-1183	hsa-miR-2355-3p
hsa-miR-4513	hsa-miR-4325	hsa-miR-2392
hsa-miR-4514	hsa-miR-7703	hsa-miR-23a-3p
hsa-miR-4519	hsa-miR-32-5p	hsa-miR-23a-5p
hsa-miR-4525	hsa-miR-363-3p	hsa-miR-23b-5p
hsa-miR-4526	hsa-miR-25-3p	hsa-miR-23c
hsa-miR-4529-3p	hsa-miR-92b-3p	hsa-miR-2467-3p
hsa-miR-4530	hsa-miR-92a-3p	hsa-miR-2467-5p
hsa-miR-4534	hsa-miR-367-3p	hsa-miR-24-1-5p
hsa-miR-378i	hsa-miR-5186	hsa-miR-24-2-5p
hsa-miR-1587	hsa-miR-6499-3p	hsa-miR-24-3p
hsa-miR-4537	hsa-miR-455-3p.2	hsa-miR-25-3p
hsa-miR-4538	hsa-miR-6516-5p	hsa-miR-25-5p
hsa-miR-3960	hsa-miR-377-5p	hsa-miR-2681-3p
hsa-miR-3976	hsa-miR-6086	hsa-miR-2682-3p
hsa-miR-3978	hsa-miR-7847-3p	hsa-miR-2682-5p
hsa-miR-4632-5p	hsa-miR-6799-5p	hsa-miR-26a-1-3p
hsa-miR-4633-3p	hsa-miR-7106-5p	hsa-miR-26a-2-3p
hsa-miR-4635	hsa-miR-30b-3p	hsa-miR-26a-5p
hsa-miR-4638-5p	hsa-miR-6779-5p	hsa-miR-26b-3p
hsa-miR-4639-5p	hsa-miR-1273h-5p	hsa-miR-27a-3p
hsa-miR-4640-3p	hsa-miR-6780a-5p	hsa-miR-27a-5p
hsa-miR-4644	hsa-miR-3689b-3p	hsa-miR-27b-3p
hsa-miR-4646-5p	hsa-miR-3689c	hsa-miR-27b-5p
hsa-miR-4646-3p	hsa-miR-6883-5p	hsa-miR-2861
hsa-miR-4648	hsa-miR-3689a-3p	hsa-miR-28-5p
hsa-miR-4650-5p	hsa-miR-4728-5p	hsa-miR-296-3p
hsa-miR-4650-3p	hsa-miR-6785-5p	hsa-miR-297
hsa-miR-4653-3p	hsa-miR-149-3p	hsa-miR-298
hsa-miR-4654	hsa-miR-627-5p	hsa-miR-299-3p
hsa-miR-4657	hsa-miR-924	hsa-miR-299-5p
hsa-miR-4659a-3p	hsa-miR-937-5p	hsa-miR-29a-3p
hsa-miR-4660	hsa-miR-8081	hsa-miR-29a-5p
hsa-miR-4664-3p	hsa-miR-135b-5p	hsa-miR-29b-1-5p
hsa-miR-4666a-5p	hsa-miR-135a-5p	hsa-miR-29b-2-5p
hsa-miR-4667-3p	hsa-miR-2392	hsa-miR-300
hsa-miR-4671-3p	hsa-miR-3605-5p	hsa-miR-301a-5p
hsa-miR-4675	hsa-miR-6894-5p	hsa-miR-301b-5p
hsa-miR-4676-5p	hsa-miR-1233-5p	hsa-miR-302a-3p
hsa-miR-4681	hsa-miR-6778-5p	hsa-miR-302a-5p
hsa-miR-4687-5p	hsa-miR-7854-3p	hsa-miR-302b-3p
hsa-miR-4689	hsa-miR-6788-5p	hsa-miR-302c-3p
hsa-miR-4690-3p	hsa-miR-30c-1-3p	hsa-miR-302d-3p
hsa-miR-4691-5p	hsa-miR-30c-2-3p	hsa-miR-302e
hsa-miR-4691-3p	hsa-miR-887-5p	hsa-miR-3064-3p
hsa-miR-4695-5p	hsa-miR-890	hsa-miR-3064-5p
hsa-miR-4701-5p	hsa-miR-5690	hsa-miR-3065-3p
hsa-miR-4701-3p	hsa-miR-7977	hsa-miR-3074-5p
hsa-miR-4708-3p	hsa-miR-5588-3p	hsa-miR-30a-3p
hsa-miR-4709-5p	hsa-miR-2114-5p	hsa-miR-30b-3p
hsa-miR-4711-3p	hsa-miR-20b-3p	hsa-miR-30c-1-3p
hsa-miR-4713-3p	hsa-miR-4633-5p	hsa-miR-30c-2-3p
hsa-miR-4715-5p	hsa-miR-532-5p	hsa-miR-30d-3p
hsa-miR-4717-3p	hsa-miR-4455	hsa-miR-30e-3p
hsa-miR-4721	hsa-miR-609	hsa-miR-3115
hsa-miR-4724-5p	hsa-miR-6772-5p	hsa-miR-3116
hsa-miR-4725-5p	hsa-miR-6776-5p	hsa-miR-3117-3p
hsa-miR-4725-3p	hsa-miR-5589-5p	hsa-miR-3118
hsa-miR-4727-3p	hsa-miR-139-5p	hsa-miR-3119
hsa-miR-4731-5p	hsa-miR-4684-5p	hsa-miR-3120-3p
hsa-miR-4732-5p	hsa-miR-6818-3p	hsa-miR-3120-5p
hsa-miR-4736	hsa-miR-6895-3p	hsa-miR-3121-3p
hsa-miR-4737	hsa-miR-4421	hsa-miR-3122
hsa-miR-3064-3p	hsa-miR-5699-3p	hsa-miR-3124-3p
hsa-miR-4740-5p	hsa-miR-339-5p	hsa-miR-3124-5p
hsa-miR-4741	hsa-miR-6732-3p	hsa-miR-3125
hsa-miR-4748	hsa-miR-3926	hsa-miR-3126-3p
hsa-miR-4752	hsa-miR-548s	hsa-miR-3126-5p
hsa-miR-371b-3p	hsa-miR-6849-3p	hsa-miR-3127-3p
hsa-miR-4762-5p	hsa-miR-4786-5p	hsa-miR-3127-5p
hsa-miR-4765	hsa-miR-769-5p	hsa-miR-3128
hsa-miR-4768-3p	hsa-miR-873-5p.1	hsa-miR-3129-5p
hsa-miR-4769-5p	hsa-miR-3974	hsa-miR-3130-5p
hsa-miR-4772-3p	hsa-miR-3165	hsa-miR-3131
hsa-miR-4776-3p	hsa-miR-3665	hsa-miR-3132
hsa-miR-4779	hsa-miR-4736	hsa-miR-3134
hsa-miR-4436b-3p	hsa-miR-6808-5p	hsa-miR-3135a
hsa-miR-4784	hsa-miR-6893-5p	hsa-miR-3135b
hsa-miR-1245b-5p	hsa-miR-940	hsa-miR-3136-3p
hsa-miR-4789-3p	hsa-miR-2682-5p	hsa-miR-3136-5p
hsa-miR-4800-5p	hsa-miR-34b-5p	hsa-miR-3137
hsa-miR-4999-5p	hsa-miR-449c-5p	hsa-miR-3138
hsa-miR-5000-3p	hsa-miR-3135a	hsa-miR-3139
hsa-miR-5001-5p	hsa-miR-6866-5p	hsa-miR-3140-3p
hsa-miR-5002-5p	hsa-miR-877-5p	hsa-miR-3141
hsa-miR-5007-5p	hsa-miR-1303	hsa-miR-3142
hsa-miR-5008-3p	hsa-miR-7157-5p	hsa-miR-3144-3p
hsa-miR-5009-5p	hsa-miR-4310	hsa-miR-3144-5p
hsa-miR-5010-5p	hsa-miR-338-3p	hsa-miR-3145-3p
hsa-miR-5087	hsa-miR-4284	hsa-miR-3146
hsa-miR-5088-3p	hsa-miR-6821-5p	hsa-miR-3147
hsa-miR-5089-5p	hsa-miR-1268b	hsa-miR-3148
hsa-miR-5092	hsa-miR-1268a	hsa-miR-3150a-3p
hsa-miR-5093	hsa-miR-585-3p	hsa-miR-3150b-3p
hsa-miR-5187-3p	hsa-miR-4486	hsa-miR-3151-3p
hsa-miR-5193	hsa-miR-5787	hsa-miR-3151-5p
hsa-miR-5195-3p	hsa-miR-4505	hsa-miR-3152-3p
hsa-miR-5196-5p	hsa-miR-1295b-3p	hsa-miR-3152-5p
hsa-miR-5197-3p	hsa-miR-4802-3p	hsa-miR-3153
hsa-miR-5100	hsa-miR-942-3p	hsa-miR-3154
hsa-miR-664b-3p	hsa-miR-6826-5p	hsa-miR-3155a
hsa-miR-1295b-5p	hsa-miR-182-5p	hsa-miR-3155b
hsa-miR-5589-5p	hsa-miR-4715-5p	hsa-miR-3157-3p
hsa-miR-5591-3p	hsa-miR-181c-3p	hsa-miR-3157-5p
hsa-miR-5684	hsa-miR-3162-3p	hsa-miR-3158-3p
hsa-miR-5685	hsa-miR-605-5p	hsa-miR-3158-5p
hsa-miR-5681b	hsa-miR-7159-5p	hsa-miR-3159
hsa-miR-5689	hsa-miR-421	hsa-miR-3160-3p
hsa-miR-5693	hsa-miR-505-3p.2	hsa-miR-3160-5p
hsa-miR-5699-3p	hsa-miR-4272	hsa-miR-3161
hsa-miR-5703	hsa-miR-6074	hsa-miR-3162-5p
hsa-miR-5705	hsa-miR-144-3p	hsa-miR-3164
hsa-miR-5707	hsa-miR-27a-3p	hsa-miR-3165
hsa-miR-1199-5p	hsa-miR-27b-3p	hsa-miR-3166
hsa-miR-6070	hsa-miR-3681-3p	hsa-miR-3167
hsa-miR-6075	hsa-miR-128-3p	hsa-miR-3169
hsa-miR-6076	hsa-miR-216a-3p	hsa-miR-3170
hsa-miR-6083	hsa-miR-513a-5p	hsa-miR-3171
hsa-miR-6086	hsa-miR-186-3p	hsa-miR-3173-3p
hsa-miR-6088	hsa-miR-4733-5p	hsa-miR-3173-5p
hsa-miR-6090	hsa-miR-6816-3p	hsa-miR-3174
hsa-miR-6124	hsa-miR-8080	hsa-miR-3175
hsa-miR-6125	hsa-miR-4521	hsa-miR-3176
hsa-miR-6127	hsa-miR-3646	hsa-miR-3177-3p
hsa-miR-6128	hsa-miR-3688-3p	hsa-miR-3178
hsa-miR-6129	hsa-miR-298	hsa-miR-3180-3p
hsa-miR-6131	hsa-miR-6721-5p	hsa-miR-3180-5p
hsa-miR-6132	hsa-miR-2681-3p	hsa-miR-3180
hsa-miR-6134	hsa-miR-545-5p	hsa-miR-3181
hsa-miR-6165	hsa-miR-383-5p.1	hsa-miR-3182
hsa-miR-6500-5p	hsa-miR-4772-5p	hsa-miR-3183
hsa-miR-6501-5p	hsa-miR-16-1-3p	hsa-miR-3184-5p
hsa-miR-6502-3p	hsa-miR-4522	hsa-miR-3185
hsa-miR-6504-5p	hsa-miR-6749-3p	hsa-miR-3186-3p
hsa-miR-6506-3p	hsa-miR-3682-5p	hsa-miR-3186-5p
hsa-miR-6509-5p	hsa-miR-3692-3p	hsa-miR-3187-3p
hsa-miR-6510-5p	hsa-miR-153-5p	hsa-miR-3187-5p
hsa-miR-6510-3p	hsa-miR-4422	hsa-miR-3188
hsa-miR-6511a-5p	hsa-miR-9-3p	hsa-miR-3189-3p
hsa-miR-6514-3p	hsa-miR-5003-3p	hsa-miR-3189-5p
hsa-miR-6715b-5p	hsa-miR-487b-5p	hsa-miR-3190-3p
hsa-miR-6715b-3p	hsa-miR-487a-5p	hsa-miR-3191-3p
hsa-miR-6716-3p	hsa-miR-1273g-5p	hsa-miR-3191-5p
hsa-miR-6717-5p	hsa-miR-203a-5p	hsa-miR-3192-5p
hsa-miR-6511b-3p	hsa-miR-1322	hsa-miR-3193
hsa-miR-6719-3p	hsa-miR-520a-5p	hsa-miR-3194-3p
hsa-miR-6721-5p	hsa-miR-525-5p	hsa-miR-3194-5p
hsa-miR-6722-3p	hsa-miR-138-2-3p	hsa-miR-3195
hsa-miR-6724-5p	hsa-miR-2117	hsa-miR-3196
hsa-miR-6730-5p	hsa-miR-4273	hsa-miR-3197
hsa-miR-6731-5p	hsa-miR-7156-5p	hsa-miR-3198
hsa-miR-6734-5p	hsa-miR-6739-3p	hsa-miR-3199
hsa-miR-6736-5p	hsa-miR-4677-5p	hsa-miR-31-3p
hsa-miR-6738-5p	hsa-miR-375	hsa-miR-31-5p
hsa-miR-6747-5p	hsa-miR-627-3p	hsa-miR-3200-3p
hsa-miR-6748-5p	hsa-miR-4761-5p	hsa-miR-3202
hsa-miR-6748-3p	hsa-miR-551b-5p	hsa-miR-320a
hsa-miR-6750-5p	hsa-miR-4477a	hsa-miR-320b
hsa-miR-6751-5p	hsa-miR-4670-3p	hsa-miR-323a-3p
hsa-miR-6752-5p	hsa-miR-2110	hsa-miR-323a-5p
hsa-miR-6752-3p	hsa-miR-4725-3p	hsa-miR-323b-3p
hsa-miR-6753-5p	hsa-miR-4271	hsa-miR-323b-5p
hsa-miR-6755-5p	hsa-miR-6780b-5p	hsa-miR-324-3p
hsa-miR-6758-5p	hsa-miR-3675-5p	hsa-miR-324-5p
hsa-miR-6758-3p	hsa-miR-4643	hsa-miR-325
hsa-miR-6759-5p	hsa-miR-5591-3p	hsa-miR-326
hsa-miR-6760-5p	hsa-miR-660-5p	hsa-miR-328-3p
hsa-miR-6763-5p	hsa-miR-489-3p	hsa-miR-328-5p
hsa-miR-6764-5p	hsa-miR-589-3p	hsa-miR-329-5p
hsa-miR-6766-5p	hsa-miR-7844-5p	hsa-miR-330-3p
hsa-miR-6766-3p	hsa-miR-380-3p	hsa-miR-330-5p
hsa-miR-6767-5p	hsa-miR-411-3p	hsa-miR-331-3p
hsa-miR-6772-5p	hsa-miR-379-3p	hsa-miR-335-3p
hsa-miR-6772-3p	hsa-miR-338-5p	hsa-miR-335-5p
hsa-miR-6773-5p	hsa-miR-183-3p	hsa-miR-337-3p
hsa-miR-6775-5p	hsa-miR-3662	hsa-miR-337-5p
hsa-miR-6775-3p	hsa-miR-302a-5p	hsa-miR-338-3p
hsa-miR-6777-3p	hsa-miR-654-3p	hsa-miR-339-5p
hsa-miR-6778-3p	hsa-miR-297	hsa-miR-33a-5p
hsa-miR-6779-5p	hsa-miR-567	hsa-miR-33b-3p
hsa-miR-6779-3p	hsa-miR-548az-5p	hsa-miR-33b-5p
hsa-miR-6780a-5p	hsa-miR-548t-5p	hsa-miR-340-3p
hsa-miR-6782-5p	hsa-miR-24-1-5p	hsa-miR-342-5p
hsa-miR-6784-5p	hsa-miR-24-2-5p	hsa-miR-345-3p
hsa-miR-6785-5p	hsa-miR-4774-3p	hsa-miR-345-5p
hsa-miR-6786-3p	hsa-miR-1279	hsa-miR-346
hsa-miR-6788-3p	hsa-miR-4501	hsa-miR-34a-5p
hsa-miR-6791-5p	hsa-miR-6715b-3p	hsa-miR-34b-5p
hsa-miR-6792-5p	hsa-miR-4775	hsa-miR-34c-5p
hsa-miR-6793-5p	hsa-miR-6782-3p	hsa-miR-3529-5p
hsa-miR-6793-3p	hsa-miR-122-3p	hsa-miR-3591-5p
hsa-miR-6794-5p	hsa-miR-1298-5p	hsa-miR-3605-3p
hsa-miR-6796-5p	hsa-miR-5681a	hsa-miR-3605-5p
hsa-miR-6797-5p	hsa-miR-6739-5p	hsa-miR-3607-5p
hsa-miR-6798-5p	hsa-miR-6733-5p	hsa-miR-3609
hsa-miR-6803-5p	hsa-miR-3153	hsa-miR-3610
hsa-miR-6804-3p	hsa-miR-491-5p	hsa-miR-3612
hsa-miR-6805-5p	hsa-miR-6796-5p	hsa-miR-3613-5p
hsa-miR-6806-3p	hsa-miR-6742-5p	hsa-miR-3614-3p
hsa-miR-6807-5p	hsa-miR-4447	hsa-miR-3614-5p
hsa-miR-6807-3p	hsa-miR-4472	hsa-miR-3615
hsa-miR-6808-5p	hsa-miR-3151-5p	hsa-miR-3616-3p
hsa-miR-6810-5p	hsa-miR-134-3p	hsa-miR-3617-3p
hsa-miR-6810-3p	hsa-miR-4745-5p	hsa-miR-3619-3p
hsa-miR-6811-5p	hsa-miR-4481	hsa-miR-3619-5p
hsa-miR-6811-3p	hsa-miR-4758-5p	hsa-miR-361-3p
hsa-miR-6812-3p	hsa-miR-1238-5p	hsa-miR-3620-3p
hsa-miR-6815-5p	hsa-miR-4682	hsa-miR-3620-5p
hsa-miR-6823-5p	hsa-miR-3921	hsa-miR-3621
hsa-miR-6824-5p	hsa-miR-4653-5p	hsa-miR-3622a-5p
hsa-miR-6825-5p	hsa-miR-3152-5p	hsa-miR-3622b-5p
hsa-miR-6826-3p	hsa-miR-6836-3p	hsa-miR-362-5p
hsa-miR-6827-3p	hsa-miR-8084	hsa-miR-363-5p
hsa-miR-6829-5p	hsa-miR-200c-3p	hsa-miR-3648
hsa-miR-6830-5p	hsa-miR-429	hsa-miR-3649
hsa-miR-6832-3p	hsa-miR-200b-3p	hsa-miR-3650
hsa-miR-6833-5p	hsa-miR-300	hsa-miR-3651
hsa-miR-6835-5p	hsa-miR-381-3p	hsa-miR-3652
hsa-miR-6780b-3p	hsa-miR-4666a-3p	hsa-miR-3653-5p
hsa-miR-6841-5p	hsa-let-7b-3p	hsa-miR-3654
hsa-miR-6843-3p	hsa-let-7f-1-3p	hsa-miR-3655
hsa-miR-6845-5p	hsa-miR-98-3p	hsa-miR-3656
hsa-miR-6846-5p	hsa-let-7a-3p	hsa-miR-3657
hsa-miR-6846-3p	hsa-miR-6507-5p	hsa-miR-3659
hsa-miR-6851-5p	hsa-miR-6077	hsa-miR-365a-5p
hsa-miR-6853-3p	hsa-miR-7-5p	hsa-miR-365b-5p
hsa-miR-6855-3p	hsa-miR-875-3p	hsa-miR-3661
hsa-miR-6856-5p	hsa-miR-1299	hsa-miR-3663-3p
hsa-miR-6856-3p	hsa-miR-6128	hsa-miR-3663-5p
hsa-miR-6858-5p	hsa-miR-518c-5p	hsa-miR-3664-3p
hsa-miR-6769b-5p	hsa-miR-3191-5p	hsa-miR-3664-5p
hsa-miR-6769b-3p	hsa-miR-6824-3p	hsa-miR-3665
hsa-miR-6860	hsa-miR-326	hsa-miR-3666
hsa-miR-6861-3p	hsa-miR-6764-3p	hsa-miR-3667-3p
hsa-miR-6865-5p	hsa-miR-330-5p	hsa-miR-3667-5p
hsa-miR-6867-5p	hsa-miR-4756-3p	hsa-miR-3670
hsa-miR-6869-5p	hsa-miR-4524b-3p	hsa-miR-3672
hsa-miR-6874-5p	hsa-miR-568	hsa-miR-3675-3p
hsa-miR-6874-3p	hsa-miR-643	hsa-miR-3675-5p
hsa-miR-6875-5p	hsa-miR-1273e	hsa-miR-3677-3p
hsa-miR-6875-3p	hsa-miR-6885-3p	hsa-miR-3677-5p
hsa-miR-6876-5p	hsa-miR-129-5p	hsa-miR-3678-3p
hsa-miR-6877-3p	hsa-miR-3148	hsa-miR-3679-5p
hsa-miR-6878-5p	hsa-miR-6830-5p	hsa-miR-367-3p
hsa-miR-6880-5p	hsa-miR-330-3p	hsa-miR-367-5p
hsa-miR-6880-3p	hsa-miR-527	hsa-miR-3680-3p
hsa-miR-6881-5p	hsa-miR-518a-5p	hsa-miR-3681-3p
hsa-miR-6883-3p	hsa-miR-19b-3p	hsa-miR-3681-5p
hsa-miR-6886-5p	hsa-miR-19a-3p	hsa-miR-3682-3p
hsa-miR-6886-3p	hsa-miR-2113	hsa-miR-3682-5p
hsa-miR-6887-5p	hsa-miR-6512-5p	hsa-miR-3684
hsa-miR-6890-5p	hsa-miR-582-5p	hsa-miR-3688-3p
hsa-miR-6890-3p	hsa-miR-4766-5p	hsa-miR-3688-5p
hsa-miR-6891-5p	hsa-miR-3200-5p	hsa-miR-3689a-3p
hsa-miR-6892-3p	hsa-miR-5189-3p	hsa-miR-3689a-5p
hsa-miR-6893-5p	hsa-miR-192-3p	hsa-miR-3689b-3p
hsa-miR-6893-3p	hsa-miR-1537-5p	hsa-miR-3689b-5p
hsa-miR-7106-3p	hsa-miR-4692	hsa-miR-3689c
hsa-miR-7107-5p	hsa-miR-4514	hsa-miR-3689d
hsa-miR-7110-3p	hsa-miR-4731-3p	hsa-miR-3689e
hsa-miR-7111-5p	hsa-miR-4801	hsa-miR-3689f
hsa-miR-7112-3p	hsa-miR-8069	hsa-miR-3691-3p
hsa-miR-7114-5p	hsa-miR-548bb-5p	hsa-miR-3691-5p
hsa-miR-7154-3p	hsa-miR-548aq-5p	hsa-miR-3692-3p
hsa-miR-7155-5p	hsa-miR-559	hsa-miR-3692-5p
hsa-miR-7157-5p	hsa-miR-548as-5p	hsa-miR-370-3p
hsa-miR-7162-3p	hsa-miR-548ap-5p	hsa-miR-370-5p
hsa-miR-7703	hsa-miR-548h-5p	hsa-miR-3713
hsa-miR-7843-3p	hsa-miR-548j-5p	hsa-miR-3714
hsa-miR-4433b-3p	hsa-miR-548o-5p	hsa-miR-371b-5p
hsa-miR-1273h-5p	hsa-miR-548ae-5p	hsa-miR-372-5p
hsa-miR-7845-5p	hsa-miR-548am-5p	hsa-miR-373-3p
hsa-miR-7846-3p	hsa-miR-548c-5p	hsa-miR-373-5p
hsa-miR-7847-3p	hsa-miR-548au-5p	hsa-miR-375
hsa-miR-7855-5p	hsa-miR-548b-5p	hsa-miR-376a-2-5p
hsa-miR-8052	hsa-miR-548w	hsa-miR-376a-3p
hsa-miR-8056	hsa-miR-548d-5p	hsa-miR-376a-5p
hsa-miR-8057	hsa-miR-548ay-5p	hsa-miR-376b-3p
hsa-miR-8060	hsa-miR-548ak	hsa-miR-376b-5p
hsa-miR-8063	hsa-miR-548ad-5p	hsa-miR-376c-5p
hsa-miR-8070	hsa-miR-548i	hsa-miR-377-5p
hsa-miR-8071	hsa-miR-548y	hsa-miR-378a-3p
hsa-miR-8072	hsa-miR-548a-5p	hsa-miR-378a-5p
hsa-miR-8075	hsa-miR-548ab	hsa-miR-378b
hsa-miR-8078	hsa-miR-548ar-5p	hsa-miR-378c
hsa-miR-8085	hsa-miR-548n	hsa-miR-378d
hsa-miR-8087	hsa-miR-7159-3p	hsa-miR-378e
hsa-miR-9718	hsa-miR-4482-3p	hsa-miR-378f
hsa-miR-9986	hsa-miR-4748	hsa-miR-378g
hsa-miR-10226	hsa-miR-4464	hsa-miR-378h
hsa-miR-10392-5p	hsa-miR-3658	hsa-miR-378i
hsa-miR-10394-5p	hsa-miR-7856-5p	hsa-miR-379-5p
hsa-miR-10396a-5p	hsa-miR-103a-3p	hsa-miR-380-5p
hsa-miR-10397-5p	hsa-miR-107	hsa-miR-381-5p
hsa-miR-10399-5p	hsa-miR-509-5p	hsa-miR-382-5p
hsa-miR-10401-5p	hsa-miR-509-3-5p	hsa-miR-383-3p
hsa-miR-10522-5p	hsa-miR-4418	hsa-miR-383-5p
hsa-miR-10525-3p	hsa-let-7c-3p	hsa-miR-384
hsa-miR-10526-3p	hsa-miR-4744	hsa-miR-3907
hsa-miR-11401	hsa-miR-4509	hsa-miR-3908
hsa-miR-3085-5p	hsa-miR-520f-5p	hsa-miR-3909
hsa-miR-6529-5p	hsa-miR-6817-3p	hsa-miR-3911
hsa-miR-9851-5p	hsa-miR-6873-3p	hsa-miR-3913-5p
hsa-miR-12114	hsa-miR-7110-3p	hsa-miR-3914
hsa-miR-12115	hsa-miR-4768-5p	hsa-miR-3915
hsa-miR-12120	hsa-miR-6833-3p	hsa-miR-3916
hsa-miR-12121	hsa-miR-942-5p	hsa-miR-3917
hsa-miR-12124	hsa-miR-141-5p	hsa-miR-3918
hsa-miR-12127	hsa-miR-4678	hsa-miR-3919
hsa-miR-1228-5p	hsa-miR-548m	hsa-miR-3921
hsa-miR-5591-5p	hsa-miR-590-3p	hsa-miR-3922-5p
hsa-miR-6892-5p	hsa-miR-5692a	hsa-miR-3925-3p
	hsa-miR-4474-5p	hsa-miR-3926
	hsa-miR-498	hsa-miR-3927-3p
	hsa-miR-3159	hsa-miR-3927-5p
	hsa-miR-4536-5p	hsa-miR-3928-3p
	hsa-miR-3122	hsa-miR-3928-5p
	hsa-miR-3913-5p	hsa-miR-3929
	hsa-miR-6513-5p	hsa-miR-3934-3p
	hsa-miR-450a-1-3p	hsa-miR-3934-5p
	hsa-miR-383-3p	hsa-miR-3935
	hsa-miR-3065-3p	hsa-miR-3936
	hsa-miR-6787-3p	hsa-miR-3937
	hsa-miR-216a-5p	hsa-miR-3938
	hsa-miR-216b-5p	hsa-miR-3939
	hsa-miR-6847-3p	hsa-miR-3940-3p
	hsa-miR-106a-3p	hsa-miR-3940-5p
	hsa-miR-764	hsa-miR-3941
	hsa-miR-4435	hsa-miR-3943
	hsa-miR-3187-3p	hsa-miR-3944-3p
	hsa-miR-4778-3p	hsa-miR-3944-5p
	hsa-miR-6515-3p	hsa-miR-3945
	hsa-miR-1236-3p	hsa-miR-3960
	hsa-miR-376c-3p	hsa-miR-3972
	hsa-miR-493-5p	hsa-miR-3973
	hsa-miR-622	hsa-miR-3976
	hsa-miR-1294	hsa-miR-3978
	hsa-miR-4677-3p	hsa-miR-410-5p
	hsa-miR-4679	hsa-miR-412-3p
	hsa-miR-4790-3p	hsa-miR-412-5p
	hsa-miR-613	hsa-miR-422a
	hsa-miR-206	hsa-miR-423-3p
	hsa-miR-1-3p	hsa-miR-423-5p
	hsa-miR-6728-5p	hsa-miR-424-3p
	hsa-miR-5187-5p	hsa-miR-424-5p
	hsa-miR-4654	hsa-miR-4251
	hsa-miR-4769-5p	hsa-miR-4252
	hsa-miR-4648	hsa-miR-4253
	hsa-miR-646	hsa-miR-4254
	hsa-miR-4530	hsa-miR-4257
	hsa-miR-198	hsa-miR-4259
	hsa-miR-6834-3p	hsa-miR-425-3p
	hsa-miR-6794-3p	hsa-miR-4260
	hsa-miR-4639-3p	hsa-miR-4261
	hsa-miR-34b-3p	hsa-miR-4262
	hsa-miR-6829-5p	hsa-miR-4263
	hsa-miR-185-3p	hsa-miR-4264
	hsa-miR-6858-5p	hsa-miR-4265
	hsa-miR-6813-5p	hsa-miR-4266
	hsa-miR-6085	hsa-miR-4267
	hsa-miR-423-5p	hsa-miR-4268
	hsa-miR-3184-5p	hsa-miR-4269
	hsa-miR-4779	hsa-miR-4270
	hsa-miR-6891-5p	hsa-miR-4271
	hsa-miR-3173-3p	hsa-miR-4273
	hsa-miR-6730-5p	hsa-miR-4274
	hsa-miR-488-3p	hsa-miR-4276
	hsa-miR-146a-3p	hsa-miR-4277
	hsa-miR-4714-5p	hsa-miR-4278
	hsa-miR-3664-5p	hsa-miR-4279
	hsa-miR-514a-5p	hsa-miR-4280
	hsa-miR-4764-5p	hsa-miR-4281
	hsa-miR-6757-5p	hsa-miR-4283
	hsa-miR-6873-5p	hsa-miR-4284
	hsa-miR-6833-5p	hsa-miR-4285
	hsa-miR-4752	hsa-miR-4287
	hsa-miR-576-3p	hsa-miR-4288
	hsa-miR-384	hsa-miR-4289
	hsa-miR-7975	hsa-miR-4291
	hsa-miR-5571-3p	hsa-miR-4292
	hsa-miR-3685	hsa-miR-4293
	hsa-miR-3124-3p	hsa-miR-4294
	hsa-miR-302d-5p	hsa-miR-4296
	hsa-miR-302b-5p	hsa-miR-4297
	hsa-miR-511-5p	hsa-miR-4298
	hsa-miR-6888-3p	hsa-miR-4299
	hsa-miR-556-3p	hsa-miR-4300
	hsa-miR-3613-5p	hsa-miR-4301
	hsa-miR-409-3p	hsa-miR-4302
	hsa-miR-33a-3p	hsa-miR-4303
	hsa-miR-3119	hsa-miR-4304
	hsa-miR-664a-5p	hsa-miR-4305
	hsa-miR-4794	hsa-miR-4306
	hsa-miR-149-5p	hsa-miR-4307
	hsa-miR-8086	hsa-miR-4308
	hsa-miR-6895-5p	hsa-miR-4309
	hsa-miR-3918	hsa-miR-4310
	hsa-miR-4637	hsa-miR-4311
	hsa-miR-935	hsa-miR-4312
	hsa-miR-377-3p	hsa-miR-4314
	hsa-miR-342-3p	hsa-miR-4315
	hsa-miR-6814-5p	hsa-miR-4316
	hsa-miR-8077	hsa-miR-4317
	hsa-miR-6884-5p	hsa-miR-4318
	hsa-miR-485-5p	hsa-miR-431-3p
	hsa-miR-4695-5p	hsa-miR-431-5p
	hsa-miR-4457	hsa-miR-4320
	hsa-miR-548ap-3p	hsa-miR-4321
	hsa-miR-548aa	hsa-miR-4322
	hsa-miR-548t-3p	hsa-miR-4323
	hsa-miR-3185	hsa-miR-4325
	hsa-miR-143-3p	hsa-miR-4326
	hsa-miR-6088	hsa-miR-4327
	hsa-miR-4770	hsa-miR-4328
	hsa-miR-374c-3p	hsa-miR-4329
	hsa-miR-3127-5p	hsa-miR-432-3p
	hsa-miR-8070	hsa-miR-432-5p
	hsa-miR-758-3p	hsa-miR-4330
	hsa-miR-8068	hsa-miR-433-3p
	hsa-miR-3140-3p	hsa-miR-4417
	hsa-miR-506-5p	hsa-miR-4418
	hsa-miR-5087	hsa-miR-4419a
	hsa-miR-29b-2-5p	hsa-miR-4419b
	hsa-miR-659-3p	hsa-miR-4420
	hsa-miR-4507	hsa-miR-4421
	hsa-miR-3940-5p	hsa-miR-4422
	hsa-miR-6839-3p	hsa-miR-4423-5p
	hsa-miR-6740-5p	hsa-miR-4425
	hsa-miR-5700	hsa-miR-4428
	hsa-miR-1324	hsa-miR-4429
	hsa-miR-6854-5p	hsa-miR-4430
	hsa-miR-4320	hsa-miR-4433a-3p
	hsa-miR-3137	hsa-miR-4433b-3p
	hsa-miR-4778-5p	hsa-miR-4435
	hsa-miR-6809-5p	hsa-miR-4436a
	hsa-miR-5695	hsa-miR-4436b-3p
	hsa-miR-519d-5p	hsa-miR-4436b-5p
	hsa-miR-515-5p	hsa-miR-4437
	hsa-miR-519e-5p	hsa-miR-4438
	hsa-miR-6845-3p	hsa-miR-4439
	hsa-miR-3675-3p	hsa-miR-4440
	hsa-miR-2115-3p	hsa-miR-4441
	hsa-miR-3074-3p	hsa-miR-4442
	hsa-miR-889-3p	hsa-miR-4443
	hsa-miR-1245b-3p	hsa-miR-4444
	hsa-miR-3128	hsa-miR-4446-3p
	hsa-miR-645	hsa-miR-4446-5p
	hsa-miR-223-5p	hsa-miR-4447
	hsa-miR-548at-5p	hsa-miR-4448
	hsa-miR-3714	hsa-miR-4449
	hsa-miR-4708-3p	hsa-miR-4450
	hsa-miR-2276-3p	hsa-miR-4451
	hsa-miR-625-3p	hsa-miR-4452
	hsa-miR-4718	hsa-miR-4453
	hsa-miR-1207-3p	hsa-miR-4455
	hsa-miR-4437	hsa-miR-4456
	hsa-miR-4283	hsa-miR-4457
	hsa-miR-4489	hsa-miR-4458
	hsa-miR-4494	hsa-miR-4459
	hsa-miR-499b-5p	hsa-miR-4460
	hsa-miR-4735-3p	hsa-miR-4461
	hsa-miR-18a-5p	hsa-miR-4462
	hsa-miR-18b-5p	hsa-miR-4463
	hsa-miR-4999-5p	hsa-miR-4465
	hsa-miR-6893-3p	hsa-miR-4466
	hsa-miR-370-3p	hsa-miR-4467
	hsa-miR-6799-3p	hsa-miR-4468
	hsa-miR-3173-5p	hsa-miR-4469
	hsa-miR-6779-3p	hsa-miR-4470
	hsa-miR-1233-3p	hsa-miR-4471
	hsa-miR-2355-5p	hsa-miR-4472
	hsa-miR-584-3p	hsa-miR-4474-3p
	hsa-miR-145-5p	hsa-miR-4475
	hsa-miR-5195-3p	hsa-miR-4476
	hsa-miR-6832-3p	hsa-miR-4478
	hsa-miR-4640-3p	hsa-miR-4479
	hsa-miR-6771-3p	hsa-miR-4480
	hsa-miR-488-5p	hsa-miR-4481
	hsa-miR-548at-3p	hsa-miR-4482-3p
	hsa-miR-548ay-3p	hsa-miR-4482-5p
	hsa-miR-548as-3p	hsa-miR-4483
	hsa-miR-4720-3p	hsa-miR-4484
	hsa-miR-4804-3p	hsa-miR-4486
	hsa-miR-4686	hsa-miR-4487
	hsa-miR-20a-3p	hsa-miR-4488
	hsa-miR-604	hsa-miR-4489
	hsa-miR-647	hsa-miR-4490
	hsa-miR-6762-3p	hsa-miR-4491
	hsa-miR-5580-5p	hsa-miR-4492
	hsa-miR-7705	hsa-miR-4494
	hsa-miR-5007-3p	hsa-miR-4496
	hsa-miR-520f-3p	hsa-miR-4497
	hsa-miR-302c-3p.2	hsa-miR-4498
	hsa-miR-302e	hsa-miR-4499
	hsa-miR-373-3p	hsa-miR-449a
	hsa-miR-302c-3p.1	hsa-miR-449b-5p
	hsa-miR-302a-3p	hsa-miR-449c-3p
	hsa-miR-302d-3p	hsa-miR-449c-5p
	hsa-miR-302b-3p	hsa-miR-4500
	hsa-miR-520d-3p	hsa-miR-4502
	hsa-miR-520e	hsa-miR-4504
	hsa-miR-372-3p	hsa-miR-4505
	hsa-miR-520b	hsa-miR-4507
	hsa-miR-520c-3p	hsa-miR-4508
	hsa-miR-520a-3p	hsa-miR-450a-1-3p
	hsa-miR-526b-3p	hsa-miR-450a-2-3p
	hsa-miR-93-5p	hsa-miR-450b-3p
	hsa-miR-20b-5p	hsa-miR-4510
	hsa-miR-20a-5p	hsa-miR-4512
	hsa-miR-17-5p	hsa-miR-4513
	hsa-miR-106b-5p	hsa-miR-4514
	hsa-miR-519d-3p	hsa-miR-4515
	hsa-miR-106a-5p	hsa-miR-4516
	hsa-miR-520h	hsa-miR-4518
	hsa-miR-520g-3p	hsa-miR-4519
	hsa-miR-653-3p	hsa-miR-451b
	hsa-miR-4420	hsa-miR-4520-3p
	hsa-miR-181b-2-3p	hsa-miR-4520-5p
	hsa-miR-181b-3p	hsa-miR-4521
	hsa-miR-4769-3p	hsa-miR-4522
	hsa-miR-6817-5p	hsa-miR-4523
	hsa-miR-6727-3p	hsa-miR-4524a-3p
	hsa-miR-4722-3p	hsa-miR-4524a-5p
	hsa-miR-1302	hsa-miR-4524b-3p
	hsa-miR-4298	hsa-miR-4524b-5p
	hsa-miR-6871-5p	hsa-miR-4525
	hsa-miR-4803	hsa-miR-4526
	hsa-miR-302c-5p	hsa-miR-4527
	hsa-miR-3143	hsa-miR-4529-3p
	hsa-miR-154-5p	hsa-miR-452-3p
	hsa-miR-1225-3p	hsa-miR-452-5p
	hsa-miR-5586-3p	hsa-miR-4530
	hsa-miR-4451	hsa-miR-4531
	hsa-miR-6831-5p	hsa-miR-4532
	hsa-miR-3927-3p	hsa-miR-4533
	hsa-miR-4500	hsa-miR-4534
	hsa-miR-98-5p	hsa-miR-4535
	hsa-let-7c-5p	hsa-miR-4536-3p
	hsa-let-7b-5p	hsa-miR-4536-5p
	hsa-let-7i-5p	hsa-miR-4537
	hsa-let-7e-5p	hsa-miR-4538
	hsa-let-7a-5p	hsa-miR-4539
	hsa-let-7f-5p	hsa-miR-454-3p
	hsa-let-7g-5p	hsa-miR-455-3p
	hsa-let-7d-5p	hsa-miR-455-5p
	hsa-miR-4458	hsa-miR-4632-3p
	hsa-miR-520g-5p	hsa-miR-4632-5p
	hsa-miR-450b-3p	hsa-miR-4633-3p
	hsa-miR-769-3p	hsa-miR-4633-5p
	hsa-miR-5089-5p	hsa-miR-4634
	hsa-miR-4425	hsa-miR-4637
	hsa-miR-3147	hsa-miR-4638-3p
	hsa-miR-4445-5p	hsa-miR-4638-5p
	hsa-miR-508-3p	hsa-miR-4639-3p
	hsa-miR-6766-3p	hsa-miR-4639-5p
	hsa-miR-219a-5p	hsa-miR-4640-3p
	hsa-miR-4782-3p	hsa-miR-4640-5p
	hsa-miR-29a-5p	hsa-miR-4641
	hsa-miR-3920	hsa-miR-4642
	hsa-miR-96-5p	hsa-miR-4643
	hsa-miR-183-5p.2	hsa-miR-4644
	hsa-miR-1271-5p	hsa-miR-4645-3p
	hsa-miR-1251-3p	hsa-miR-4646-3p
	hsa-miR-6801-3p	hsa-miR-4646-5p
	hsa-miR-6810-3p	hsa-miR-4647
	hsa-miR-331-3p	hsa-miR-4648
	hsa-miR-6507-3p	hsa-miR-4649-3p
	hsa-miR-31-3p	hsa-miR-4649-5p
	hsa-miR-5586-5p	hsa-miR-4650-3p
	hsa-miR-503-3p	hsa-miR-4651
	hsa-miR-5683	hsa-miR-4652-3p
	hsa-miR-3919	hsa-miR-4652-5p
	hsa-miR-2115-5p	hsa-miR-4653-3p
	hsa-miR-4743-3p	hsa-miR-4653-5p
	hsa-miR-4652-3p	hsa-miR-4654
	hsa-miR-657	hsa-miR-4655-5p
	hsa-miR-625-5p	hsa-miR-4656
	hsa-miR-6794-5p	hsa-miR-4657
	hsa-miR-4716-3p	hsa-miR-4658
	hsa-miR-139-3p	hsa-miR-4659a-5p
	hsa-miR-766-5p	hsa-miR-4659b-3p
	hsa-miR-668-3p	hsa-miR-4659b-5p
	hsa-miR-5587-5p	hsa-miR-4660
	hsa-miR-432-3p	hsa-miR-4662a-3p
	hsa-miR-1254	hsa-miR-4662b
	hsa-miR-3116	hsa-miR-4663
	hsa-miR-661	hsa-miR-4664-3p
	hsa-miR-5002-3p	hsa-miR-4664-5p
	hsa-miR-584-5p	hsa-miR-4665-3p
	hsa-miR-4644	hsa-miR-4665-5p
	hsa-miR-4306	hsa-miR-4666a-5p
	hsa-miR-185-5p	hsa-miR-4667-5p
	hsa-miR-5192	hsa-miR-4669
	hsa-miR-1270	hsa-miR-4670-3p
	hsa-miR-620	hsa-miR-4670-5p
	hsa-miR-4690-5p	hsa-miR-4672
	hsa-miR-1276	hsa-miR-4673
	hsa-miR-583	hsa-miR-4674
	hsa-miR-362-5p	hsa-miR-4675
	hsa-miR-500b-5p	hsa-miR-4676-3p
	hsa-miR-501-5p	hsa-miR-4676-5p
	hsa-miR-6861-5p	hsa-miR-4677-3p
	hsa-miR-4716-5p	hsa-miR-4677-5p
	hsa-miR-1197	hsa-miR-4679
	hsa-miR-6733-3p	hsa-miR-4680-5p
	hsa-miR-4302	hsa-miR-4682
	hsa-miR-4276	hsa-miR-4683
	hsa-miR-6732-5p	hsa-miR-4684-3p
	hsa-miR-6805-5p	hsa-miR-4684-5p
	hsa-miR-4278	hsa-miR-4685-3p
	hsa-miR-580-5p	hsa-miR-4685-5p
	hsa-miR-6839-5p	hsa-miR-4686
	hsa-miR-378j	hsa-miR-4687-3p
	hsa-miR-1243	hsa-miR-4688
	hsa-miR-32-3p	hsa-miR-4689
	hsa-miR-550b-3p	hsa-miR-4690-3p
	hsa-miR-1248	hsa-miR-4690-5p
	hsa-miR-6868-3p	hsa-miR-4691-3p
	hsa-miR-1237-3p	hsa-miR-4691-5p
	hsa-miR-411-5p.1	hsa-miR-4692
	hsa-miR-3973	hsa-miR-4693-3p
	hsa-miR-520d-5p	hsa-miR-4693-5p
	hsa-miR-524-5p	hsa-miR-4694-5p
	hsa-miR-3117-3p	hsa-miR-4695-3p
	hsa-miR-376a-5p	hsa-miR-4695-5p
	hsa-miR-4760-5p	hsa-miR-4697-3p
	hsa-miR-8061	hsa-miR-4697-5p
	hsa-miR-3653-5p	hsa-miR-4699-5p
	hsa-miR-1976	hsa-miR-4700-3p
	hsa-miR-4279	hsa-miR-4700-5p
	hsa-miR-4524a-3p	hsa-miR-4701-3p
	hsa-miR-451b	hsa-miR-4701-5p
	hsa-miR-4330	hsa-miR-4703-3p
	hsa-miR-1285-5p	hsa-miR-4704-3p
	hsa-miR-4742-3p	hsa-miR-4704-5p
	hsa-miR-6882-5p	hsa-miR-4705
	hsa-miR-1228-3p	hsa-miR-4706
	hsa-miR-4758-3p	hsa-miR-4707-3p
	hsa-miR-874-5p	hsa-miR-4707-5p
	hsa-miR-1972	hsa-miR-4708-3p
	hsa-miR-4650-5p	hsa-miR-4708-5p
	hsa-miR-1266-3p	hsa-miR-4709-3p
	hsa-miR-5197-5p	hsa-miR-4709-5p
	hsa-miR-6808-3p	hsa-miR-4710
	hsa-miR-4780	hsa-miR-4711-3p
	hsa-miR-296-3p	hsa-miR-4711-5p
	hsa-miR-708-3p	hsa-miR-4712-3p
	hsa-miR-127-5p	hsa-miR-4712-5p
	hsa-miR-3928-5p	hsa-miR-4713-3p
	hsa-miR-6806-3p	hsa-miR-4713-5p
	hsa-miR-5187-3p	hsa-miR-4714-3p
	hsa-miR-4680-3p	hsa-miR-4714-5p
	hsa-miR-4427	hsa-miR-4715-3p
	hsa-miR-301a-5p	hsa-miR-4715-5p
	hsa-miR-301b-5p	hsa-miR-4716-3p
	hsa-miR-6809-3p	hsa-miR-4716-5p
	hsa-miR-8065	hsa-miR-4717-3p
	hsa-miR-320d	hsa-miR-4718
	hsa-miR-320c	hsa-miR-4720-3p
	hsa-miR-320a	hsa-miR-4720-5p
	hsa-miR-4429	hsa-miR-4721
	hsa-miR-320b	hsa-miR-4722-3p
	hsa-miR-483-3p.2	hsa-miR-4722-5p
	hsa-miR-548b-3p	hsa-miR-4723-3p
	hsa-miR-3189-5p	hsa-miR-4723-5p
	hsa-miR-3922-5p	hsa-miR-4725-3p
	hsa-miR-374c-5p	hsa-miR-4726-3p
	hsa-miR-655-3p	hsa-miR-4726-5p
	hsa-miR-4528	hsa-miR-4727-3p
	hsa-miR-5000-5p	hsa-miR-4727-5p
	hsa-miR-4662a-3p	hsa-miR-4728-3p
	hsa-miR-514b-5p	hsa-miR-4728-5p
	hsa-miR-513c-5p	hsa-miR-4729
	hsa-miR-6751-3p	hsa-miR-4730
	hsa-miR-1199-5p	hsa-miR-4731-5p
	hsa-miR-4438	hsa-miR-4732-3p
	hsa-miR-3927-5p	hsa-miR-4732-5p
	hsa-miR-496.1	hsa-miR-4733-3p
	hsa-miR-3198	hsa-miR-4734
	hsa-miR-4309	hsa-miR-4735-5p
	hsa-miR-2277-3p	hsa-miR-4736
	hsa-miR-6857-5p	hsa-miR-4737
	hsa-miR-4450	hsa-miR-4738-3p
	hsa-miR-450a-2-3p	hsa-miR-4738-5p
	hsa-miR-6763-5p	hsa-miR-4739
	hsa-miR-6810-5p	hsa-miR-4740-5p
	hsa-miR-3150a-3p	hsa-miR-4741
	hsa-miR-5572	hsa-miR-4742-3p
	hsa-miR-4260	hsa-miR-4742-5p
	hsa-miR-150-3p	hsa-miR-4743-3p
	hsa-miR-6884-3p	hsa-miR-4743-5p
	hsa-miR-3934-3p	hsa-miR-4745-3p
	hsa-miR-28-3p	hsa-miR-4745-5p
	hsa-miR-1273a	hsa-miR-4746-3p
	hsa-miR-6888-5p	hsa-miR-4746-5p
	hsa-miR-4722-5p	hsa-miR-4747-3p
	hsa-miR-16-5p	hsa-miR-4747-5p
	hsa-miR-195-5p	hsa-miR-4748
	hsa-miR-15a-5p	hsa-miR-4749-5p
	hsa-miR-6838-5p	hsa-miR-4750-5p
	hsa-miR-15b-5p	hsa-miR-4751
	hsa-miR-497-5p	hsa-miR-4752
	hsa-miR-424-5p	hsa-miR-4753-3p
	hsa-miR-3945	hsa-miR-4753-5p
	hsa-miR-6862-5p	hsa-miR-4754
	hsa-miR-4253	hsa-miR-4755-3p
	hsa-miR-654-5p	hsa-miR-4755-5p
	hsa-miR-541-3p	hsa-miR-4756-3p
	hsa-miR-1255b-5p	hsa-miR-4756-5p
	hsa-miR-1255a	hsa-miR-4757-3p
	hsa-miR-6744-5p	hsa-miR-4757-5p
	hsa-miR-760	hsa-miR-4758-5p
	hsa-miR-8057	hsa-miR-4761-3p
	hsa-miR-6822-3p	hsa-miR-4761-5p
	hsa-miR-3677-5p	hsa-miR-4762-3p
	hsa-miR-922	hsa-miR-4763-3p
	hsa-miR-4520-3p	hsa-miR-4763-5p
	hsa-miR-3138	hsa-miR-4764-5p
	hsa-miR-4796-3p	hsa-miR-4765
	hsa-miR-4293	hsa-miR-4766-3p
	hsa-miR-548ao-5p	hsa-miR-4766-5p
	hsa-miR-548ax	hsa-miR-4767
	hsa-miR-5699-5p	hsa-miR-4768-3p
	hsa-miR-4485-3p	hsa-miR-4769-3p
	hsa-miR-3678-3p	hsa-miR-4769-5p
	hsa-miR-2467-3p	hsa-miR-4770
	hsa-miR-5585-3p	hsa-miR-4772-3p
	hsa-miR-4452	hsa-miR-4772-5p
	hsa-miR-219a-2-3p	hsa-miR-4773
	hsa-miR-219b-3p	hsa-miR-4774-3p
	hsa-miR-628-5p	hsa-miR-4774-5p
	hsa-miR-137	hsa-miR-4775
		hsa-miR-4776-3p
		hsa-miR-4776-5p
		hsa-miR-4777-3p
		hsa-miR-4778-3p
		hsa-miR-4779
		hsa-miR-4780
		hsa-miR-4781-3p
		hsa-miR-4781-5p
		hsa-miR-4782-5p
		hsa-miR-4784
		hsa-miR-4785
		hsa-miR-4786-3p
		hsa-miR-4786-5p
		hsa-miR-4787-3p
		hsa-miR-4787-5p
		hsa-miR-4790-3p
		hsa-miR-4790-5p
		hsa-miR-4791
		hsa-miR-4792
		hsa-miR-4793-3p
		hsa-miR-4793-5p
		hsa-miR-4794
		hsa-miR-4796-5p
		hsa-miR-4797-3p
		hsa-miR-4797-5p
		hsa-miR-4799-3p
		hsa-miR-4800-5p
		hsa-miR-4802-5p
		hsa-miR-4804-3p
		hsa-miR-4804-5p
		hsa-miR-483-3p
		hsa-miR-483-5p
		hsa-miR-484
		hsa-miR-485-3p
		hsa-miR-485-5p
		hsa-miR-486-3p
		hsa-miR-486-5p
		hsa-miR-487a-5p
		hsa-miR-487b-5p
		hsa-miR-488-5p
		hsa-miR-489-5p
		hsa-miR-490-5p
		hsa-miR-491-5p
		hsa-miR-492
		hsa-miR-493-3p
		hsa-miR-493-5p
		hsa-miR-494-5p
		hsa-miR-495-5p
		hsa-miR-496
		hsa-miR-497-5p
		hsa-miR-498
		hsa-miR-4999-3p
		hsa-miR-4999-5p
		hsa-miR-499a-3p
		hsa-miR-499b-3p
		hsa-miR-499b-5p
		hsa-miR-5000-5p
		hsa-miR-5001-3p
		hsa-miR-5001-5p
		hsa-miR-5002-3p
		hsa-miR-5003-3p
		hsa-miR-5004-3p
		hsa-miR-5004-5p
		hsa-miR-5006-3p
		hsa-miR-5006-5p
		hsa-miR-5007-5p
		hsa-miR-5008-3p
		hsa-miR-5008-5p
		hsa-miR-5009-5p
		hsa-miR-500a-3p
		hsa-miR-500b-5p
		hsa-miR-5010-3p
		hsa-miR-5010-5p
		hsa-miR-5011-3p
		hsa-miR-502-3p
		hsa-miR-502-5p
		hsa-miR-503-3p
		hsa-miR-503-5p
		hsa-miR-5047
		hsa-miR-504-3p
		hsa-miR-504-5p
		hsa-miR-505-5p
		hsa-miR-506-3p
		hsa-miR-506-5p
		hsa-miR-507
		hsa-miR-5087
		hsa-miR-5088-3p
		hsa-miR-5088-5p
		hsa-miR-5089-5p
		hsa-miR-508-3p
		hsa-miR-508-5p
		hsa-miR-5090
		hsa-miR-5091
		hsa-miR-5093
		hsa-miR-5095
		hsa-miR-5096
		hsa-miR-509-3-5p
		hsa-miR-509-3p
		hsa-miR-509-5p
		hsa-miR-5100
		hsa-miR-510-5p
		hsa-miR-511-5p
		hsa-miR-512-3p
		hsa-miR-512-5p
		hsa-miR-513a-5p
		hsa-miR-513b-3p
		hsa-miR-513b-5p
		hsa-miR-513c-5p
		hsa-miR-514a-3p
		hsa-miR-514b-3p
		hsa-miR-514b-5p
		hsa-miR-515-3p
		hsa-miR-515-5p
		hsa-miR-516a-3p
		hsa-miR-516a-5p
		hsa-miR-516b-3p
		hsa-miR-516b-5p
		hsa-miR-517-5p
		hsa-miR-517a-3p
		hsa-miR-517b-3p
		hsa-miR-517c-3p
		hsa-miR-5186
		hsa-miR-5187-5p
		hsa-miR-5188
		hsa-miR-5189-3p
		hsa-miR-5189-5p
		hsa-miR-518a-3p
		hsa-miR-518c-3p
		hsa-miR-518c-5p
		hsa-miR-518d-3p
		hsa-miR-518d-5p
		hsa-miR-518e-3p
		hsa-miR-518e-5p
		hsa-miR-518f-5p
		hsa-miR-5190
		hsa-miR-5191
		hsa-miR-5192
		hsa-miR-5193
		hsa-miR-5194
		hsa-miR-5195-3p
		hsa-miR-5195-5p
		hsa-miR-5196-5p
		hsa-miR-5197-3p
		hsa-miR-5197-5p
		hsa-miR-519a-3p
		hsa-miR-519a-5p
		hsa-miR-519b-3p
		hsa-miR-519b-5p
		hsa-miR-519c-3p
		hsa-miR-519c-5p
		hsa-miR-519d-3p
		hsa-miR-519d-5p
		hsa-miR-519e-5p
		hsa-miR-520a-3p
		hsa-miR-520a-5p
		hsa-miR-520b
		hsa-miR-520c-3p
		hsa-miR-520c-5p
		hsa-miR-520d-3p
		hsa-miR-520d-5p
		hsa-miR-520e
		hsa-miR-520f-3p
		hsa-miR-520f-5p
		hsa-miR-520g-3p
		hsa-miR-520g-5p
		hsa-miR-520h
		hsa-miR-522-5p
		hsa-miR-523-5p
		hsa-miR-524-5p
		hsa-miR-525-5p
		hsa-miR-526a
		hsa-miR-526b-3p
		hsa-miR-526b-5p
		hsa-miR-532-3p
		hsa-miR-532-5p
		hsa-miR-539-3p
		hsa-miR-539-5p
		hsa-miR-541-3p
		hsa-miR-541-5p
		hsa-miR-542-3p
		hsa-miR-542-5p
		hsa-miR-543
		hsa-miR-544a
		hsa-miR-544b
		hsa-miR-548ah-5p
		hsa-miR-548ai
		hsa-miR-548al
		hsa-miR-548an
		hsa-miR-548ao-3p
		hsa-miR-548at-5p
		hsa-miR-548au-3p
		hsa-miR-548b-3p
		hsa-miR-548d-3p
		hsa-miR-548q
		hsa-miR-548u
		hsa-miR-548v
		hsa-miR-548y
		hsa-miR-550a-3-5p
		hsa-miR-550a-3p
		hsa-miR-550a-5p
		hsa-miR-550b-2-5p
		hsa-miR-550b-3p
		hsa-miR-551a
		hsa-miR-552-3p
		hsa-miR-554
		hsa-miR-555
		hsa-miR-556-5p
		hsa-miR-5571-3p
		hsa-miR-5571-5p
		hsa-miR-5572
		hsa-miR-5579-3p
		hsa-miR-557
		hsa-miR-5580-3p
		hsa-miR-5580-5p
		hsa-miR-5581-3p
		hsa-miR-5581-5p
		hsa-miR-5582-5p
		hsa-miR-5584-3p
		hsa-miR-5584-5p
		hsa-miR-5585-3p
		hsa-miR-5585-5p
		hsa-miR-5586-3p
		hsa-miR-5586-5p
		hsa-miR-5587-3p
		hsa-miR-5587-5p
		hsa-miR-5588-3p
		hsa-miR-5589-3p
		hsa-miR-5589-5p
		hsa-miR-558
		hsa-miR-5590-3p
		hsa-miR-5591-5p
		hsa-miR-563
		hsa-miR-564
		hsa-miR-566
		hsa-miR-567
		hsa-miR-5680
		hsa-miR-5681a
		hsa-miR-5682
		hsa-miR-5683
		hsa-miR-5684
		hsa-miR-5685
		hsa-miR-5691
		hsa-miR-5693
		hsa-miR-5694
		hsa-miR-5696
		hsa-miR-5698
		hsa-miR-5699-3p
		hsa-miR-569
		hsa-miR-5703
		hsa-miR-5704
		hsa-miR-5705
		hsa-miR-5706
		hsa-miR-5707
		hsa-miR-5708
		hsa-miR-570-5p
		hsa-miR-571
		hsa-miR-572
		hsa-miR-5739
		hsa-miR-574-5p
		hsa-miR-575
		hsa-miR-576-3p
		hsa-miR-5787
		hsa-miR-578
		hsa-miR-579-5p
		hsa-miR-581
		hsa-miR-582-5p
		hsa-miR-583
		hsa-miR-584-3p
		hsa-miR-584-5p
		hsa-miR-585-3p
		hsa-miR-585-5p
		hsa-miR-586
		hsa-miR-589-3p
		hsa-miR-589-5p
		hsa-miR-590-5p
		hsa-miR-591
		hsa-miR-592
		hsa-miR-593-3p
		hsa-miR-593-5p
		hsa-miR-595
		hsa-miR-596
		hsa-miR-597-3p
		hsa-miR-597-5p
		hsa-miR-598-5p
		hsa-miR-600
		hsa-miR-601
		hsa-miR-602
		hsa-miR-604
		hsa-miR-605-3p
		hsa-miR-6068
		hsa-miR-6069
		hsa-miR-6070
		hsa-miR-6071
		hsa-miR-6072
		hsa-miR-6073
		hsa-miR-6074
		hsa-miR-6075
		hsa-miR-6076
		hsa-miR-6077
		hsa-miR-6078
		hsa-miR-6079
		hsa-miR-6080
		hsa-miR-6081
		hsa-miR-6084
		hsa-miR-6085
		hsa-miR-6086
		hsa-miR-6087
		hsa-miR-6088
		hsa-miR-6089
		hsa-miR-608
		hsa-miR-6090
		hsa-miR-609
		hsa-miR-611
		hsa-miR-6124
		hsa-miR-6125
		hsa-miR-6126
		hsa-miR-6127
		hsa-miR-6128
		hsa-miR-6129
		hsa-miR-612
		hsa-miR-6130
		hsa-miR-6131
		hsa-miR-6132
		hsa-miR-6133
		hsa-miR-6134
		hsa-miR-613
		hsa-miR-614
		hsa-miR-615-3p
		hsa-miR-615-5p
		hsa-miR-6165
		hsa-miR-616-3p
		hsa-miR-617
		hsa-miR-619-3p
		hsa-miR-619-5p
		hsa-miR-620
		hsa-miR-621
		hsa-miR-622
		hsa-miR-623
		hsa-miR-624-3p
		hsa-miR-624-5p
		hsa-miR-625-5p
		hsa-miR-626
		hsa-miR-627-3p
		hsa-miR-627-5p
		hsa-miR-628-3p
		hsa-miR-629-3p
		hsa-miR-629-5p
		hsa-miR-630
		hsa-miR-631
		hsa-miR-632
		hsa-miR-634
		hsa-miR-635
		hsa-miR-636
		hsa-miR-637
		hsa-miR-638
		hsa-miR-639
		hsa-miR-640
		hsa-miR-641
		hsa-miR-642a-3p
		hsa-miR-642a-5p
		hsa-miR-642b-3p
		hsa-miR-642b-5p
		hsa-miR-643
		hsa-miR-644a
		hsa-miR-645
		hsa-miR-646
		hsa-miR-647
		hsa-miR-648
		hsa-miR-6499-3p
		hsa-miR-6499-5p
		hsa-miR-6500-3p
		hsa-miR-6500-5p
		hsa-miR-6501-3p
		hsa-miR-6501-5p
		hsa-miR-6502-3p
		hsa-miR-6502-5p
		hsa-miR-6503-3p
		hsa-miR-6503-5p
		hsa-miR-6504-3p
		hsa-miR-6504-5p
		hsa-miR-6505-5p
		hsa-miR-6506-5p
		hsa-miR-6507-3p
		hsa-miR-6507-5p
		hsa-miR-6508-3p
		hsa-miR-6509-5p
		hsa-miR-650
		hsa-miR-6510-3p
		hsa-miR-6510-5p
		hsa-miR-6511a-3p
		hsa-miR-6511a-5p
		hsa-miR-6511b-3p
		hsa-miR-6511b-5p
		hsa-miR-6512-3p
		hsa-miR-6512-5p
		hsa-miR-6513-3p
		hsa-miR-6513-5p
		hsa-miR-6514-3p
		hsa-miR-6514-5p
		hsa-miR-6515-3p
		hsa-miR-6515-5p
		hsa-miR-6516-3p
		hsa-miR-6516-5p
		hsa-miR-651-3p
		hsa-miR-652-3p
		hsa-miR-652-5p
		hsa-miR-653-3p
		hsa-miR-653-5p
		hsa-miR-654-5p
		hsa-miR-655-5p
		hsa-miR-656-5p
		hsa-miR-657
		hsa-miR-658
		hsa-miR-659-3p
		hsa-miR-660-3p
		hsa-miR-660-5p
		hsa-miR-661
		hsa-miR-662
		hsa-miR-663a
		hsa-miR-663b
		hsa-miR-664a-3p
		hsa-miR-664a-5p
		hsa-miR-664b-3p
		hsa-miR-664b-5p
		hsa-miR-665
		hsa-miR-668-3p
		hsa-miR-668-5p
		hsa-miR-670-3p
		hsa-miR-670-5p
		hsa-miR-6715b-3p
		hsa-miR-6715b-5p
		hsa-miR-6716-3p
		hsa-miR-6716-5p
		hsa-miR-6717-5p
		hsa-miR-6718-5p
		hsa-miR-6719-3p
		hsa-miR-671-3p
		hsa-miR-671-5p
		hsa-miR-6720-3p
		hsa-miR-6720-5p
		hsa-miR-6721-5p
		hsa-miR-6722-3p
		hsa-miR-6722-5p
		hsa-miR-6723-5p
		hsa-miR-6724-5p
		hsa-miR-6726-3p
		hsa-miR-6726-5p
		hsa-miR-6727-3p
		hsa-miR-6727-5p
		hsa-miR-6728-3p
		hsa-miR-6728-5p
		hsa-miR-6729-5p
		hsa-miR-6730-3p
		hsa-miR-6730-5p
		hsa-miR-6731-3p
		hsa-miR-6731-5p
		hsa-miR-6732-3p
		hsa-miR-6732-5p
		hsa-miR-6733-5p
		hsa-miR-6734-3p
		hsa-miR-6734-5p
		hsa-miR-6735-3p
		hsa-miR-6735-5p
		hsa-miR-6736-3p
		hsa-miR-6736-5p
		hsa-miR-6737-3p
		hsa-miR-6737-5p
		hsa-miR-6738-3p
		hsa-miR-6738-5p
		hsa-miR-6739-3p
		hsa-miR-6739-5p
		hsa-miR-6740-3p
		hsa-miR-6740-5p
		hsa-miR-6741-5p
		hsa-miR-6742-3p
		hsa-miR-6742-5p
		hsa-miR-6743-3p
		hsa-miR-6743-5p
		hsa-miR-6744-3p
		hsa-miR-6744-5p
		hsa-miR-6745
		hsa-miR-6746-3p
		hsa-miR-6746-5p
		hsa-miR-6747-3p
		hsa-miR-6747-5p
		hsa-miR-6748-3p
		hsa-miR-6748-5p
		hsa-miR-6749-3p
		hsa-miR-6749-5p
		hsa-miR-6750-5p
		hsa-miR-6751-3p
		hsa-miR-6751-5p
		hsa-miR-6752-3p
		hsa-miR-6752-5p
		hsa-miR-6753-3p
		hsa-miR-6753-5p
		hsa-miR-6754-3p
		hsa-miR-6754-5p
		hsa-miR-6755-3p
		hsa-miR-6755-5p
		hsa-miR-6756-3p
		hsa-miR-6756-5p
		hsa-miR-6757-5p
		hsa-miR-6758-3p
		hsa-miR-6758-5p
		hsa-miR-6759-5p
		hsa-miR-675-3p
		hsa-miR-675-5p
		hsa-miR-6760-5p
		hsa-miR-6761-3p
		hsa-miR-6761-5p
		hsa-miR-6762-3p
		hsa-miR-6762-5p
		hsa-miR-6763-3p
		hsa-miR-6763-5p
		hsa-miR-6764-3p
		hsa-miR-6764-5p
		hsa-miR-6765-3p
		hsa-miR-6765-5p
		hsa-miR-6766-5p
		hsa-miR-6767-3p
		hsa-miR-6767-5p
		hsa-miR-6768-3p
		hsa-miR-6768-5p
		hsa-miR-6769a-3p
		hsa-miR-6769a-5p
		hsa-miR-6769b-3p
		hsa-miR-6769b-5p
		hsa-miR-676-3p
		hsa-miR-6770-3p
		hsa-miR-6770-5p
		hsa-miR-6771-3p
		hsa-miR-6771-5p
		hsa-miR-6772-3p
		hsa-miR-6772-5p
		hsa-miR-6773-3p
		hsa-miR-6773-5p
		hsa-miR-6774-5p
		hsa-miR-6775-3p
		hsa-miR-6775-5p
		hsa-miR-6776-5p
		hsa-miR-6777-5p
		hsa-miR-6778-3p
		hsa-miR-6778-5p
		hsa-miR-6779-3p
		hsa-miR-6779-5p
		hsa-miR-6780a-3p
		hsa-miR-6780a-5p
		hsa-miR-6780b-3p
		hsa-miR-6780b-5p
		hsa-miR-6781-3p
		hsa-miR-6781-5p
		hsa-miR-6782-3p
		hsa-miR-6782-5p
		hsa-miR-6783-3p
		hsa-miR-6783-5p
		hsa-miR-6784-5p
		hsa-miR-6785-3p
		hsa-miR-6785-5p
		hsa-miR-6786-3p
		hsa-miR-6786-5p
		hsa-miR-6787-3p
		hsa-miR-6787-5p
		hsa-miR-6788-5p
		hsa-miR-6789-3p
		hsa-miR-6789-5p
		hsa-miR-6790-3p
		hsa-miR-6790-5p
		hsa-miR-6791-3p
		hsa-miR-6791-5p
		hsa-miR-6792-3p
		hsa-miR-6792-5p
		hsa-miR-6793-3p
		hsa-miR-6793-5p
		hsa-miR-6794-3p
		hsa-miR-6794-5p
		hsa-miR-6795-3p
		hsa-miR-6795-5p
		hsa-miR-6796-3p
		hsa-miR-6796-5p
		hsa-miR-6797-5p
		hsa-miR-6798-5p
		hsa-miR-6799-3p
		hsa-miR-6799-5p
		hsa-miR-6800-5p
		hsa-miR-6801-3p
		hsa-miR-6801-5p
		hsa-miR-6802-5p
		hsa-miR-6803-5p
		hsa-miR-6804-3p
		hsa-miR-6804-5p
		hsa-miR-6805-3p
		hsa-miR-6805-5p
		hsa-miR-6806-3p
		hsa-miR-6806-5p
		hsa-miR-6807-3p
		hsa-miR-6807-5p
		hsa-miR-6808-3p
		hsa-miR-6808-5p
		hsa-miR-6809-3p
		hsa-miR-6809-5p
		hsa-miR-6810-3p
		hsa-miR-6810-5p
		hsa-miR-6811-3p
		hsa-miR-6811-5p
		hsa-miR-6812-3p
		hsa-miR-6812-5p
		hsa-miR-6813-5p
		hsa-miR-6814-3p
		hsa-miR-6814-5p
		hsa-miR-6815-3p
		hsa-miR-6815-5p
		hsa-miR-6816-5p
		hsa-miR-6817-3p
		hsa-miR-6817-5p
		hsa-miR-6818-3p
		hsa-miR-6818-5p
		hsa-miR-6819-5p
		hsa-miR-6820-3p
		hsa-miR-6820-5p
		hsa-miR-6821-3p
		hsa-miR-6821-5p
		hsa-miR-6822-3p
		hsa-miR-6822-5p
		hsa-miR-6823-3p
		hsa-miR-6823-5p
		hsa-miR-6824-3p
		hsa-miR-6824-5p
		hsa-miR-6825-5p
		hsa-miR-6826-3p
		hsa-miR-6827-3p
		hsa-miR-6827-5p
		hsa-miR-6828-5p
		hsa-miR-6829-3p
		hsa-miR-6829-5p
		hsa-miR-6830-3p
		hsa-miR-6830-5p
		hsa-miR-6831-5p
		hsa-miR-6832-3p
		hsa-miR-6832-5p
		hsa-miR-6833-3p
		hsa-miR-6833-5p
		hsa-miR-6834-5p
		hsa-miR-6835-5p
		hsa-miR-6836-3p
		hsa-miR-6836-5p
		hsa-miR-6837-3p
		hsa-miR-6837-5p
		hsa-miR-6838-3p
		hsa-miR-6838-5p
		hsa-miR-6839-3p
		hsa-miR-6839-5p
		hsa-miR-6840-3p
		hsa-miR-6841-3p
		hsa-miR-6841-5p
		hsa-miR-6842-3p
		hsa-miR-6842-5p
		hsa-miR-6843-3p
		hsa-miR-6845-3p
		hsa-miR-6845-5p
		hsa-miR-6846-3p
		hsa-miR-6846-5p
		hsa-miR-6847-3p
		hsa-miR-6847-5p
		hsa-miR-6848-3p
		hsa-miR-6848-5p
		hsa-miR-6849-3p
		hsa-miR-6849-5p
		hsa-miR-6850-3p
		hsa-miR-6850-5p
		hsa-miR-6851-5p
		hsa-miR-6852-5p
		hsa-miR-6853-3p
		hsa-miR-6853-5p
		hsa-miR-6854-3p
		hsa-miR-6854-5p
		hsa-miR-6855-5p
		hsa-miR-6856-3p
		hsa-miR-6856-5p
		hsa-miR-6857-3p
		hsa-miR-6857-5p
		hsa-miR-6858-3p
		hsa-miR-6858-5p
		hsa-miR-6859-5p
		hsa-miR-6860
		hsa-miR-6861-3p
		hsa-miR-6861-5p
		hsa-miR-6862-5p
		hsa-miR-6863
		hsa-miR-6864-3p
		hsa-miR-6864-5p
		hsa-miR-6865-5p
		hsa-miR-6866-3p
		hsa-miR-6866-5p
		hsa-miR-6867-3p
		hsa-miR-6867-5p
		hsa-miR-6868-3p
		hsa-miR-6868-5p
		hsa-miR-6869-3p
		hsa-miR-6869-5p
		hsa-miR-6870-3p
		hsa-miR-6870-5p
		hsa-miR-6871-3p
		hsa-miR-6871-5p
		hsa-miR-6872-3p
		hsa-miR-6872-5p
		hsa-miR-6873-3p
		hsa-miR-6873-5p
		hsa-miR-6874-3p
		hsa-miR-6874-5p
		hsa-miR-6875-3p
		hsa-miR-6875-5p
		hsa-miR-6876-3p
		hsa-miR-6876-5p
		hsa-miR-6877-3p
		hsa-miR-6877-5p
		hsa-miR-6878-3p
		hsa-miR-6878-5p
		hsa-miR-6879-3p
		hsa-miR-6879-5p
		hsa-miR-6880-3p
		hsa-miR-6880-5p
		hsa-miR-6881-3p
		hsa-miR-6881-5p
		hsa-miR-6882-3p
		hsa-miR-6882-5p
		hsa-miR-6883-3p
		hsa-miR-6883-5p
		hsa-miR-6884-3p
		hsa-miR-6884-5p
		hsa-miR-6885-3p
		hsa-miR-6885-5p
		hsa-miR-6886-3p
		hsa-miR-6886-5p
		hsa-miR-6887-3p
		hsa-miR-6887-5p
		hsa-miR-6888-3p
		hsa-miR-6888-5p
		hsa-miR-6889-3p
		hsa-miR-6889-5p
		hsa-miR-6890-5p
		hsa-miR-6891-5p
		hsa-miR-6892-5p
		hsa-miR-6893-3p
		hsa-miR-6893-5p
		hsa-miR-6894-3p
		hsa-miR-6894-5p
		hsa-miR-6895-3p
		hsa-miR-6895-5p
		hsa-miR-708-5p
		hsa-miR-7106-3p
		hsa-miR-7106-5p
		hsa-miR-7107-3p
		hsa-miR-7107-5p
		hsa-miR-7108-5p
		hsa-miR-7109-5p
		hsa-miR-7110-3p
		hsa-miR-7110-5p
		hsa-miR-7111-3p
		hsa-miR-7111-5p
		hsa-miR-7112-3p
		hsa-miR-7112-5p
		hsa-miR-7113-3p
		hsa-miR-7113-5p
		hsa-miR-7114-5p
		hsa-miR-711
		hsa-miR-7150
		hsa-miR-7151-3p
		hsa-miR-7151-5p
		hsa-miR-7152-3p
		hsa-miR-7152-5p
		hsa-miR-7153-3p
		hsa-miR-7154-3p
		hsa-miR-7154-5p
		hsa-miR-7155-5p
		hsa-miR-7156-3p
		hsa-miR-7156-5p
		hsa-miR-7157-3p
		hsa-miR-7157-5p
		hsa-miR-7158-3p
		hsa-miR-7158-5p
		hsa-miR-7159-5p
		hsa-miR-7160-3p
		hsa-miR-7160-5p
		hsa-miR-7161-3p
		hsa-miR-7161-5p
		hsa-miR-7162-3p
		hsa-miR-7162-5p
		hsa-miR-718
		hsa-miR-744-5p
		hsa-miR-7515
		hsa-miR-758-3p
		hsa-miR-758-5p
		hsa-miR-760
		hsa-miR-761
		hsa-miR-762
		hsa-miR-7641
		hsa-miR-764
		hsa-miR-765
		hsa-miR-766-3p
		hsa-miR-766-5p
		hsa-miR-767-3p
		hsa-miR-767-5p
		hsa-miR-769-3p
		hsa-miR-769-5p
		hsa-miR-7703
		hsa-miR-7704
		hsa-miR-7705
		hsa-miR-7706
		hsa-miR-770-5p
		hsa-miR-7843-3p
		hsa-miR-7843-5p
		hsa-miR-7844-5p
		hsa-miR-7845-5p
		hsa-miR-7846-3p
		hsa-miR-7847-3p
		hsa-miR-7848-3p
		hsa-miR-7849-3p
		hsa-miR-7850-5p
		hsa-miR-7852-3p
		hsa-miR-7853-5p
		hsa-miR-7854-3p
		hsa-miR-7855-5p
		hsa-miR-7856-5p
		hsa-miR-7974
		hsa-miR-7976
		hsa-miR-7978
		hsa-miR-7-5p
		hsa-miR-802
		hsa-miR-8052
		hsa-miR-8053
		hsa-miR-8054
		hsa-miR-8055
		hsa-miR-8056
		hsa-miR-8057
		hsa-miR-8058
		hsa-miR-8059
		hsa-miR-8060
		hsa-miR-8063
		hsa-miR-8064
		hsa-miR-8065
		hsa-miR-8068
		hsa-miR-8069
		hsa-miR-8070
		hsa-miR-8071
		hsa-miR-8072
		hsa-miR-8073
		hsa-miR-8074
		hsa-miR-8075
		hsa-miR-8077
		hsa-miR-8078
		hsa-miR-8079
		hsa-miR-8080
		hsa-miR-8081
		hsa-miR-8082
		hsa-miR-8085
		hsa-miR-8086
		hsa-miR-8087
		hsa-miR-8088
		hsa-miR-8089
		hsa-miR-873-3p
		hsa-miR-873-5p
		hsa-miR-874-3p
		hsa-miR-875-3p
		hsa-miR-877-3p
		hsa-miR-877-5p
		hsa-miR-885-3p
		hsa-miR-885-5p
		hsa-miR-887-3p
		hsa-miR-887-5p
		hsa-miR-889-5p
		hsa-miR-890
		hsa-miR-891a-3p
		hsa-miR-891a-5p
		hsa-miR-891b
		hsa-miR-892a
		hsa-miR-892b
		hsa-miR-892c-3p
		hsa-miR-892c-5p
		hsa-miR-920
		hsa-miR-921
		hsa-miR-922
		hsa-miR-924
		hsa-miR-92a-1-5p
		hsa-miR-92a-2-5p
		hsa-miR-92a-3p
		hsa-miR-92b-3p
		hsa-miR-92b-5p
		hsa-miR-933
		hsa-miR-934
		hsa-miR-935
		hsa-miR-936
		hsa-miR-937-5p
		hsa-miR-938
		hsa-miR-939-3p
		hsa-miR-939-5p
		hsa-miR-93-3p
		hsa-miR-93-5p
		hsa-miR-940
		hsa-miR-941
		hsa-miR-942-3p
		hsa-miR-942-5p
		hsa-miR-943
		hsa-miR-9500
		hsa-miR-96-5p
		hsa-miR-98-5p
		hsa-miR-99b-3p
		hsa-miR-9-5p
