# Supplementary material for: Comprehensive Analysis of hsa-miR-654-5p’s Tumor-Suppressing Functions
Source: Int J Mol Sci. 2022 Jun 8;23(12):6411. doi: 10.3390/ijms23126411 (PMC9224266; doi:10.3390/ijms23126411)
Supplement: Supplementary file 1 [file ijms-23-06411-s001.zip › Supp. Info. 3_654-predicted-Targets.xlsx]

## Sheet: Sheet1
miRWalks	RNA22	TargetScan	miRanda
ABL1	A1BG	RSPO4	TRIM26
BRD3	A1CF	PRX	CNIH2
MLLT6	A2M	GUCA2B	LOC100133161
TMEM201	A2ML1	GNG13	TOX4
SHC1	A4GALT	SYNDIG1L	KIR2DL4
GPR161	A4GNT	PVRL1	PDXP
ATP1B2	AAAS	FAM222B	RGPD1
CCDC82	AACS	PIP5K1C	PRDX2
GPBP1	AADACL3	PLEKHM1	PTPN20B
SOGA1	AADACL4	PCDH11X	JPH4
FYTTD1	AADAT	RASD2	MFAP4
JAKMIP1	AAED1	EDAR	C20orf72
POLE3	AAGAB	SIRT6	ESAM
PAPPA	AAK1	DIRAS1	DUXA
CDYL	AAMDC	HLA-G	HLA-B
NDUFB3	AAMP	COTL1	CACNB2
NHEJ1	AANAT	DDR1	DYNC2LI1
CACNB4	AAR2	HSPG2	NFKBIL1
LY75-CD302	AARD	CCDC74A	TCF7L2
ALDH3B1	AARS	ZFYVE28	CSH1
AQP4	AARS2	KIF17	ACACA
ME2	AARSD1	CABP2	GSN
SERPINB8	AASDH	HRH3	SLC7A8
DLX3	AASDHPPT	LCN8	STAB2
VPS13D	AASS	C1QL1	BET1L
BNIP3L	AATK	SCLY	PFKFB4
RASGRF1	ABAT	CIITA	RNF121
DHX40	ABCA1	ZFHX2	SCUBE3
GNA13	ABCA10	RAB1B	LARP4
KCTD2	ABCA12	PAX8	DISC1
RNF213	ABCA2	PBX3	NTM
ZNF81	ABCA3	FOSL1	KRBA1
SMC1A	ABCA4	PELI3	LOC221122
SLC25A53	ABCA5	MRPL49	LIPT2
TK2	ABCA6	HELZ2	DDR1
RAE1	ABCA7	C1orf233	ZNF771
WRB	ABCA8	HAX1	BCKDK
CSF1	ABCA9	C2orf71	BEYLA
LRIG2	ABCB1	C10orf91	PAX5
ITPRIP	ABCB11	AFF3	SCN2A
KRTAP5-2	ABCB4	AC092850.1	PEBP4
ZMYM5	ABCB6	B3GAT1	SNAP25
CRYL1	ABCB8	SCGB1A1	CD55
FREM2	ABCB9	HCFC1	EPHA5
SLC25A30	ABCC1	S100A1	C16orf57
GPR180	ABCC10	PDE6G	LPHN2
HS6ST3	ABCC11	APCDD1L	ABI1
DPF1	ABCC12	WDR82	DGKZ
INTS7	ABCC2	HMGA1	LRRC49
GREM2	ABCC3	C10orf53	KIR2DS4
NFAT5	ABCC4	THEM6	GRIA4
GLG1	ABCC5	C17orf103	GRM2
ZBTB39	ABCC6	GH1	BRWD3
RAB21	ABCC8	STK32A	STAU1
PPP1R3E	ABCC9	PLA2G2C	PIK3IP1
NOVA1	ABCD1	AL133373.1	NDUFV1
SEMA3D	ABCD2	RP11-527L4.2	GPR17
SLCO2A1	ABCD3	CLEC16A	TOX2
DHX36	ABCD4	CLSTN2	NCRNA00171
TRIM59	ABCE1	ITM2C	SLC47A1
ENOX2	ABCF1	MOK	EP400NL
ARHGAP36	ABCF2	CAPN5	HLA-DQB2
RAP2C	ABCF3	WBP1	CAMKV
CD99L2	ABCG1	STC1	LDB3
SUN2	ABCG2	CABP4	SEZ6
PPARA	ABCG4	VDR	RIMS1
STS	ABCG5	TMEM75	EHD2
RANBP6	ABCG8	XIRP1	TNIP1
SAXO1	ABHD1	PDLIM7	PCBP3
MOB3B	ABHD11	BMP1	psiTPTE22
RGS4	ABHD12	ALX3	TRPM2
ZNF416	ABHD13	SPATA33	FLJ10661
SEC14L2	ABHD14B	OR10W1	PAX2
SEC14L6	ABHD15	GJB4	USF1
TST	ABHD16B	RALGPS1	CSHL1
RAB3B	ABHD17A	AC008267.1	CLEC2L
MYSM1	ABHD17B	COL5A1	2022-09-03
PHC1	ABHD17C	LASP1	RNF40
RAD1	ABHD2	AC013269.5	CLCF1
PIK3R1	ABHD3	HSPB2	ASB16
RPS23	ABHD4	FBXO46	BDNF
ACTN1	ABHD6	SLX4	HMGA1
DNAL1	ABHD8	TRIM26	GIT1
NEK9	ABI1	AL391421.1	NCAPH2
FOXN3	ABI2	GLP2R	ATF7IP
CYP7B1	ABI3	ATP6V0C	LINGO2
UGT2A1	ABI3BP	KRTAP4-7	GAPVD1
RUFY3	ABL1	PRNT	NBPF10
PDLIM5	ABL2	PPP1R1B	SHOX2
SLC35A1	ABLIM1	MUC6	LOC284632
FUT9	ABLIM2	CPLX4	PPAP2A
EYA4	ABLIM3	SYNGR4	STK38
EPHA10	ABR	S100A11	CCL4L1
DRAM1	ABT1	LHPP	LRTOMT
KSR2	ABTB1	GH2	DDX11
CAMKK2	ABTB2	RP11-114H20.1	PUS1
KIF3C	AC004381.6	CSHL1	EIF3B
SLC30A6	AC004754.3	CBFA2T3	GRIA1
EIF2AK2	AC006116.20	RP11-363G10.2	GPSM3
ATXN7L1	AC069063.2	ABCB8	PTPLB
WASL	AC073107.1	SLC25A47	DGKA
TMEM209	AC092881.1	YKT6	RAB33A
OR7A5	AC108938.5	KBTBD12	OSR2
KLF2	AC129492.1	C15orf39	ISCA1
HAUS5	ACAA1	CSH1	PADI2
METTL14	ACAA2	PIM3	FMNL2
GRIA2	ACACA	ALPK3	CRHR2
MAML1	ACACB	LY6G5C	RGPD8
MRPS25	ACAD10	REPIN1	RAPGEF5
PTPN5	ACAD11	MSI1	TARBP2
SLC5A12	ACAD8	GDPD4	TMEM129
RASA1	ACAD9	MAP1LC3A	PVRL4
CAMK4	ACADM	SHISA9	LOC728723
TTC23	ACADSB	CNPY4	NOTCH4
PCSK6	ACADVL	RCOR2	BCL2L13
ZBED2	ACAN	PTRH1	TP73
WDR5B	ACAP1	PITPNM2	BAT1
TPRA1	ACAP2	SLC37A1	TOP3B
VCL	ACAP3	BCL7A	PTPN23
PCGF5	ACAT1	GSDMD	CCDC135
NUFIP2	ACAT2	MT4	LOC654433
PSMD11	ACBD4	CEACAM8	HSPG2
TSPAN16	ACBD5	CHRNE	C17orf28
FAM216B	ACCS	MALL	BACE2
CPM	ACCSL	SNURF	MTSS1
KALRN	ACD	ATG2A	GJD3
CLIC5	ACE	PEBP4	LOC340544
ALDOB	ACE2	C9orf9	TMEM117
DLGAP1	ACER1	GPR171	CUL9
RPS6KA6	ACER2	C15orf38-AP3S2	SLC8A3
TBC1D8	ACER3	UBXN10	APOBEC3F
ZNF570	ACHE	CASP5	RXFP2
CHRM3	ACIN1	ARL8A	ZNF506
ATP5MF	ACKR1	KRT16	BAHD1
KCNAB1	ACKR2	TCF7L2	PQBP1
DDX17	ACKR3	CCDC74B	TRIM46
HDGF	ACLY	MGAT3	HPS5
MACC1	ACN9	DCX	ZBTB3
NME6	ACO1	STK38	CYP21A2
POTEA	ACO2	LDB3	WDR82
ODAPH	ACOT1	NKAIN4	C12orf35
PDIK1L	ACOT11	RPL23	ARPC2
FNDC5	ACOT12	SPOCD1	CNP
FOSL2	ACOT13	PGPEP1	CCDC36
SMIM31	ACOT2	WFDC8	RTN3
TUB	ACOT4	MLEC	TRUB2
CSNK1G3	ACOT7	CAMK2A	ITM2C
ST3GAL6	ACOT8	TMEM11	ANKRD26P1
IQCB1	ACOT9	ZCCHC24	HERC4
ANKRD12	ACOX1	MEX3B	NPNT
KATNAL2	ACOX2	CKB	COL4A3
PRKCB	ACOX3	ZNF124	GSG1
C21orf91	ACOXL	LLGL1	C9orf70
CKAP2L	ACP2	PLAGL2	CCDC146
GPSM2	ACP5	PLXNA2	LRRC4B
SLC15A1	ACP6	GEM	EPS8L2
FKBP6	ACPP	B4GALT4	RNF2
SMURF1	ACPT	TMEM120B	RNH1
CD34	ACR	RAB3A	CLDND1
WIPI2	ACRBP	RP11-17M16.1	DCAF17
HBS1L	ACRC	ISY1-RAB43	HLA-E
TMEM234	ACRV1	MVB12B	ABI3BP
SMO	ACSBG1	CRABP2	ELMO1
CCDC14	ACSBG2	C1orf95	LSM12
ATMIN	ACSF2	KLHL25	NRAP
ETV3L	ACSF3	AC002472.13	COBLL1
PSMC2	ACSL1	SLC6A8	MUC1
SHC4	ACSL3	SMOC1	RFFL
PSD3	ACSL5	ENTPD5	SYNPR
B4GALT1	ACSL6	ATXN2	HLA-G
CHMP5	ACSM1	CDC6	MSL3
AQP7	ACSM2A	EN1	C17orf108
UBAP1	ACSM2B	SHANK3	NNAT
KIF24	ACSM3	ZNF747	PPM1G
TJP2	ACSM5	INPP5B	LDLR
FAM189A2	ACSM6	SPECC1	MYO10
SMC5	ACSS1	EPHA8	ARID2
KLF9	ACSS2	GPR173	KHDRBS1
ABHD17B	ACTA1	NBPF6	SCNN1B
RORB	ACTA2	F2RL3	C20orf29
RFK	ACTB	RAB40C	CYTSB
GNA14	ACTC1	INO80E	LOC646743
FRMD3	ACTG1	NNAT	LCORL
KIF27	ACTG2	TMEM184A	CSF1R
NTRK2	ACTL10	GLIS2	ITGA10
SPIN1	ACTL6B	CCL22	RNF5P1
SHC3	ACTL7A	FAM154A	USF2
ZNF484	ACTL7B	LYSMD1	TSPAN3
CARD19	ACTL8	WAS	DDX12
FAM120AOS	ACTL9	CEP170B	HKR1
ZNF510	ACTN1	PAQR4	ZFX
ANP32B	ACTN2	CHMP1A	GPR132
GALNT12	ACTN4	EHD2	SLC11A1
BAAT	ACTR10	C16orf58	ALB
CYLC2	ACTR1A	GRB2	BCL2L1
NIPSNAP3B	ACTR1B	DNAJC24	GLYR1
ABCA1	ACTR3B	NR5A1	ARHGAP39
FSD1L	ACTR5	TMEM178B	FAM71F2
FRRS1L	ACTR8	CLN6	ZNF187
PTPN3	ACTRT1	MGLL	PNMA5
PALM2-AKAP2	ACVR1	IL4R	CCDC64
AKAP2	ACVR1B	FAM211A	LOC643387
ANGPT4	ACVR1C	WNT11	C5orf60
PSMF1	ACVR2B	ARFGAP1	KIF17
UBOX5	ACVRL1	NACC1	IRF7
C20orf194	ACY1	TOR4A	PDE4B
GFRA4	ACY3	CXCL16	PPFIA3
C20orf27	ACYP2	OS9	ARHGEF9
RNF24	ADA	MAF	TRIM59
PRND	ADAL	NUTM1	ZSCAN12
RASSF2	ADAM10	BSPRY	OBP2A
CDS2	ADAM11	GLRX3	ATF3
CRLS1	ADAM12	AP5S1	PEA15
FERMT1	ADAM15	CMIP	LRRC37A2
BMP2	ADAM17	CACNA2D2	C1orf57
SLX4IP	ADAM18	C9orf16	PARN
BANF2	ADAM19	LGALS3BP	MMEL1
ZNF133	ADAM2	LOXL3	ELN
CST11	ADAM20	SLC39A13	LYPD6B
ENTPD6	ADAM22	PLEKHA6	OSGIN1
MYLK2	ADAM23	LMX1B	MAP3K9
CCM2L	ADAM28	C14orf132	TOP1
C20orf203	ADAM29	SLC18A3	HLA-C
MAPRE1	ADAM30	RBM43	AMPD2
PXMP4	ADAM32	ADAMTS7	LOC285626
ZNF341	ADAM33	GRIN1	SPHKAP
EIF2S2	ADAM7	KCNG1	DDX11L11
MAP1LC3A	ADAM8	PAX7	MED29
NFS1	ADAM9	GPR17	CYP46A1
PHF20	ADAMTS1	FGF18	UBR3
SLA2	ADAMTS10	CYB5R3	LY6G5C
SAMHD1	ADAMTS12	RP11-20I23.1	BRD1
RBL1	ADAMTS13	ST8SIA4	TCOF1
RPRD1B	ADAMTS14	TRIM54	LIMD2
TGM2	ADAMTS15	AC174470.1	FGFR4
KIAA1755	ADAMTS16	FAU	SYNJ1
PPP1R16B	ADAMTS17	PLXNB3	CABP4
TOX2	ADAMTS18	CLCN6	C16orf58
WISP2	ADAMTS19	TOX2	NBPF8
TOMM34	ADAMTS2	IL17REL	FKBP9L
WFDC5	ADAMTS20	HPCAL4	LOC400891
EPPIN-WFDC6	ADAMTS3	RFXAP	NR5A1
WFDC8	ADAMTS4	NDUFA10	POMGNT1
TNNC2	ADAMTS5	GLYR1	SH3D19
IGF2BP2	ADAMTS6	C20orf166	LOC63930
DGKG	ADAMTS7	PDK2	MADD
MASP1	ADAMTS8	CYP4A22	PAK4
LPP	ADAMTS9	CALML3	KCTD15
TP63	ADAMTSL1	CDT1	PRSS54
GMNC	ADAMTSL2	PAX2	RAB43
LRRC15	ADAMTSL3	DERL3	ZNF385A
LSG1	ADAMTSL4	SCN4A	MGAT3
ACAP2	ADAMTSL5	RHOA	KIR2DL1
MUC20	ADAP1	ST5	DMRT2
UBXN7	ADAP2	MAFG	TRPC4AP
SENP5	ADAR	SNRPB	THNSL2
MELTF	ADARB1	AP2M1	ACTR10
LRCH3	ADARB2	NT5DC3	ATL2
LMLN	ADAT1	PYGB	TMCC2
ZNF595	ADAT2	RANBP10	C20orf166
ZNF141	ADAT3	PLCD3	USP2
UVSSA	ADCK1	CYP4A11	ARHGAP27
NSD2	ADCK2	CSDC2	IL12RB2
POLN	ADCK3	CD2	HSPB2
RNF4	ADCK4	NODAL	KRT5
C4orf50	ADCK5	AL353791.1	SPTBN4
KIAA0232	ADCY1	TAB1	PDGFRB
TADA2B	ADCY10	TYK2	FAM8A1
PSAPL1	ADCY2	CBS	GNAO1
AFAP1	ADCY3	TYROBP	CDK18
NKX3-2	ADCY4	CYP46A1	COL27A1
CD38	ADCY5	SRM	ISCA1P1
LCORL	ADCY6	TIMP2	C18orf25
PACRGL	ADCY7	HDAC7	PRX
SLC34A2	ADCY8	COL4A3	CELF6
TLR6	ADCY9	GJD3	ASXL2
SMIM14	ADCYAP1R1	EFNB1	TNRC6C
MUSK	ADD1	TMEM239	LRRC37A3
ZNF483	ADD2	OBP2A	IRAK1BP1
DNAJC25	ADD3	GALE	SGSM3
PTBP3	ADGB	ARAF	LRRC32
KIAA1958	ADH1A	SLC52A1	DBH
INIP	ADH1B	MMEL1	MLL
SLC31A1	ADH4	CXADR	FAM195A
ZNF618	ADH5	ALKBH6	NIT1
ATP6V1G1	ADH6	ZBTB3	PPT2
TNFSF15	ADHFE1	PHYHIP	SORBS1
ASTN2	ADI1	UNC5B	DGKH
FBXW2	ADIG	CLEC11A	ZNF286A
TRAF1	ADIPOQ	NREP	LIPG
STOM	ADIPOR1	SH2D1B	SYVN1
LHX6	ADIPOR2	RAB36	MED15
PTGS1	ADIRF	CTD-2054N24.2	FOXA3
PDCL	ADK	TP53I11	LARGE
NR6A1	ADM	C1QC	RBM43
OLFML2A	ADM2	BTBD2	CCM2
SCAI	ADM5	TMEM229B	NEDD4
GAPVD1	ADNP	NSMF	MYOD1
PBX3	ADNP2	TCOF1	PCGF5
LMX1B	ADORA1	MEOX1	NUMBL
ZBTB43	ADORA2A	ABCA2	SH3PXD2B
RALGPS1	ADORA3	AP3S2	FAM157B
ENG	ADPGK	TEX22	FAM153C
FAM102A	ADPRH	DRAXIN	NRN1
SLC25A25	ADPRHL1	PSMD9	GRIN2D
GLE1	ADPRM	ZMAT2	VAMP2
MIGA2	ADRA1A	RAMP2	KCNK3
ASB6	ADRA1B	KIAA0247	CABP2
C9orf78	ADRA1D	ELMO1	POU2F3
FNBP1	ADRA2A	PSCA	TRIM55
GPR107	ADRA2B	C1orf147	SMG5
NCS1	ADRA2C	PABPC1L2B	PHF19
EXOSC2	ADRB1	RUFY4	MKRN1
RAPGEF1	ADRB2	LETM2	ACCN1
DDX31	ADRB3	CNR2	CCDC40
GTF3C4	ADRBK1	WFDC2	ABI3
SPACA9	ADRBK2	ACE	FAM172A
BRD3OS	ADRM1	WNT4	FLJ45244
WDR5	ADSL	C12orf77	FIBCD1
CAMSAP1	AEBP1	ANO9	ZSCAN2
QSOX2	AEBP2	STK40	CCNDBP1
GPSM1	AES	MFAP4	TGFBI
FAM50B	AFAP1	LIF	MAP3K12
NRN1	AFAP1L1	RAET1L	MPZL2
BLOC1S5	AFAP1L2	OBP2B	PSCA
SLC35B3	AFF1	EPSTI1	ABCB8
MAK	AFF2	TMCO4	SPRR2B
NEDD9	AFF3	RNF41	C6orf201
TMEM170B	AFF4	ENTPD2	CBS
TBC1D7-LOC100130357	AFG3L2	TMEM241	HRH3
TBC1D7	AFM	NRROS	DUS4L
SIRT5	AFP	OVOL1	C9orf16
DTNBP1	AFTPH	MISP	ALOX15B
FAM8A1	AGAP1	RECQL5	RNF41
KIF13A	AGAP10	L1CAM	TRIM29
TPMT	AGAP2	GRIN2A	ATXN7L3
RNF144B	AGAP3	FRS3	TRIM40
E2F3	AGAP4	DCN	ANGPT2
SOX4	AGAP6	SFTPB	MAPK11
KIAA0319	AGBL1	KSR1	ANXA11
RIPOR2	AGBL2	ADARB2	HDAC7
TRIM38	AGBL4	CTD-2117L12.1	AP1S1
HFE	AGBL5	HRH2	TRIM68
ZSCAN31	AGFG1	TMEM129	PDK2
ZKSCAN3	AGFG2	NDUFV1	LOC339524
GABBR1	AGGF1	RP1-139D8.6	LOC100132832
TRIM26	AGK	HAPLN1	AES
DDR1	AGL	KCNA2	MAF
SFTA2	AGMAT	PCDHB11	LOC100128560
DDX39B	AGMO	TOM1	ALDH3A1
LST1	AGO1	CSNK2A2	DMRTA2
NCR3	AGO2	CNIH2	ATP6V1B1
GPANK1	AGO3	ZCCHC16	MINA
MPIG6B	AGO4	LIMD2	HCG27
NEU1	AGPAT1	AES	NGEF
PPT2	AGPAT3	SLC43A2	PRDM7
EGFL8	AGPAT4	TMEM140	TCTN1
HLA-DOB	AGPAT5	CTD-2267D19.3	GLRA2
HECW2	AGPAT6	PIK3R6	SPOP
GTF3C3	AGPAT9	NRGN	MYO3B
C2orf69	AGPS	HID1	NOV
SPATS2L	AGRN	BCAS3	CDC6
CASP8	AGT	ME2	CALML3
NBEAL1	AGTPBP1	HEATR2	LMO3
CYP20A1	AGTR1	RP11-94B19.4	PLEC
CD28	AGTR2	IVD	STYXL1
INO80D	AGTRAP	MLF2	TENC1
FASTKD2	AGXT	C17orf107	CCDC137
CCNYL1	AGXT2	FAM193A	ACSF3
RPE	AHCY	C15orf56	ADRBK1
CPS1	AHCYL1	ERGIC1	LOC344595
VWC2L	AHCYL2	LCK	HRH2
PNKD	AHDC1	GDF5	SERPINB3
TUBA4B	AHI1	SLC25A42	NICN1
SGPP2	AHNAK	SLC47A1	KPNB1
IRS1	AHNAK2	ZNF385B	WASH2P
RHBDD1	AHR	FAM222A	GCM1
MFF	AHRR	ZNF493	AGXT
SLC19A3	AHSA1	PRDX2	CHRNA9
TRIP12	AHSA2	LRRC18	LOC401589
SP100	AHSG	SLC9A3R2	C15orf40
C2orf72	AICDA	DYNLL2	RPL29P2
DGKD	AIDA	CRISPLD2	TMEM45A
TFCP2L1	AIFM1	SPRN	SAE1
CYP27C1	AIFM2	SLC5A5	LOC284260
WDR33	AIFM3	SMG5	OBFC2A
AMER3	AIG1	CD79B	SLC25A20
FAM168B	AIM1	RAVER1	ID2
NCKAP5	AIM1L	RPH3A	SCGB1A1
MGAT5	AIMP2	LDLRAD2	TULP3
SPOPL	AIPL1	KIR3DL1	OSBPL7
ZEB2	AIRE	TEX28	ITM2B
ACVR2A	AJAP1	TEX28P1	C8orf55
RBM43	AJUBA	TEX28P2	RNF8
ERMN	AK1	NECAB2	FAM81A
UPP2	AK2	COL11A2	RAD51L1
LY75	AK3	TSPAN3	POU6F2
PLA2R1	AK4	LAMTOR4	LGALS9
TBR1	AK5	SLC26A1	TSPO
GCA	AK7	PRKAR2A	ATPAF1
FIGN	AK8	TAPBP	SEC24C
DHRS9	AK9	SOST	DOCK3
DCAF17	AKAP1	PEA15	COL11A2
DLX1	AKAP10	MRPL12	GEM
HOXD4	AKAP11	SETD1A	ECM2
PDE11A	AKAP12	THAP7	WDR74
SESTD1	AKAP13	SPATA16	IARS
ZNF385B	AKAP14	MDGA1	FTSJ1
UBE2E3	AKAP2	C15orf27	MED14
DNAJC10	AKAP3	FOXA3	SPEN
DUSP19	AKAP4	NOTCH4	FGF13
GULP1	AKAP5	TMEM150A	RNF32
ORMDL1	AKAP6	PAM16	MAPRE2
MSTN	AKAP8	LYRM9	APOL2
C2orf88	AKAP8L	CBX2	TPM2
BRMS1	AKAP9	C10orf71	SAP30BP
SLC29A2	AKIP1	VMAC	TTLL5
BBS1	AKIRIN1	FBXL6	SEC16A
ZDHHC24	AKIRIN2	FAM185A	FAM120A
C11orf86	AKNA	SARM1	PIK3R1
RHOD	AKNAD1	RNF4	LRRN4CL
CDK2AP2	AKR1B10	DRP2	CYP4F22
NUDT8	AKR1C1	CNOT4	KLHL29
CPT1A	AKR1C3	IGFBP5	CDK2AP2
TPCN2	AKR1C4	RXRA	SLC38A4
ORAOV1	AKR1D1	ZNF30	PRKD3
SHANK2	AKR1E2	HCRT	CD1D
KRTAP5-7	AKR7A2	OSGIN1	KIRREL2
RNF121	AKR7A3	PDE6B	RBPJ
LRTOMT	AKR7L	AGO1	MYADM
ANAPC15	AKT1	HOXA11	MEST
CLPB	AKT1S1	RHBDL1	EMX1
RELT	AKT2	KCTD15	CNR1
FAM168A	AKT3	NRAP	MS4A2
PLEKHB1	AKTIP	C10orf105	MDS2
RAB6A	AL049794.1	GP1BB	WDR81
COA4	AL356289.1	KIAA1324L	TNK1
PPME1	AL513523.2	CLLU1	GTF3C4
NEU3	ALAD	REXO1	CRBN
WNT11	ALAS1	ALOX15B	SLCO2B1
ACER3	ALAS2	FAM8A1	KCNG4
RAB30	ALCAM	KCNK5	NRGN
CCDC90B	ALDH16A1	ARC	TTTY4B
FZD4	ALDH18A1	TRMT44	CRYAB
SLC36A4	ALDH1A1	ATXN7L3	ZMIZ1
MRE11	ALDH1A2	AL603965.1	RAB7L1
ENDOD1	ALDH1A3	CABIN1	SFTPB
CNTN5	ALDH1B1	AL591684.1	ITIH4
PGR	ALDH1L1	MIF	IL19
CEP126	ALDH1L2	PCBP3	TMEM219
BIRC3	ALDH2	LY6E	LOC647979
DCUN1D5	ALDH3A1	IGF2BP3	PAK6
GRIA4	ALDH3A2	CAND2	FAM3A
CUL5	ALDH3B1	CCDC130	MALL
ATM	ALDH3B2	CD3EAP	C22orf9
EXPH5	ALDH4A1	PROP1	NHEDC2
RDX	ALDH5A1	ZNF284	ADAP2
PCYT2	ALDH6A1	EIF2B3	STMN1
MAFG	ALDH7A1	SIX5	CD3EAP
RFNG	ALDH8A1	ZNF787	LIMK1
SLC16A3	ALDH9A1	ZNF598	ZADH2
CSNK1D	ALDOA	HHLA2	ZNF815
OGFOD3	ALDOC	ZNF93	RNF207
C17orf62	ALG10	DDX17	TSPAN17
B3GNTL1	ALG10B	B3GAT2	PPM1H
THOC1	ALG12	SLC15A1	ZYX
CETN1	ALG13	TMEM92	YJEFN3
TYMS	ALG14	NELFB	STK40
YES1	ALG2	ENTPD6	KIAA1377
MYL12A	ALG3	HLA-DQB2	LETM2
AKAIN1	ALG6	PPP1R17	EXOC7
RALBP1	ALG8	PTPN23	DMWD
RAB31	ALG9	KCTD11	MMP19
ANKRD62	ALK	TAS1R3	PFKFB2
LDLRAD4	ALKBH1	ACBD7	MEOX1
ZNF519	ALKBH4	PPM1H	CDR2L
TMEM241	ALKBH5	MRPL4	ZNF202
TTC39C	ALKBH6	CABLES2	ZNF493
DSC3	ALKBH7	THPO	BRAP
GAREM1	ALKBH8	NUP188	RUNX1T1
DTNA	ALLC	SYNGR1	CNN2
ZNF396	ALMS1	CES4A	ALS2CL
SLC39A6	ALOX12	WIPI2	TAOK2
SETBP1	ALOX12B	NAT8L	DNAJA4
EPG5	ALOX15	ATP6V0A1	SPDYE5
RNF165	ALOX15B	IQSEC1	C5orf13
LOXHD1	ALOXE3	POLR3H	KIAA0562
PIAS2	ALPI	PABPC1L2A	UBE3B
SMAD2	ALPK1	TCTN2	NEK9
RPL17-C18orf32	ALPK2	C5orf20	TRPM7
C18orf32	ALPK3	FLT4	HSD3B7
MBD1	ALPL	CD84	PDE6B
MAPK4	ALPP	FAM25E	ANK1
MRO	ALPPL2	CMTM1	PCDHA9
MBD2	ALS2	AP4S1	TRABD
POLI	ALS2CL	CDK2AP2	STARD5
C18orf54	ALS2CR11	MDM4	EBF4
CCDC68	ALX1	HPD	SMAP1
BOD1L2	ALX3	PGAM5	LRP8
ONECUT2	ALX4	CACNG4	SCARA5
NEDD4L	AMBN	EFNA2	CYB5R3
BCL2	AMBRA1	VAC14	AP3S1
SERPINB13	AMDHD1	ZNF385A	CAMKK1
SERPINB2	AMDHD2	BAZ1B	SLC6A2
CDH7	AMELX	DMBX1	RNF212
DSEL	AMELY	RDH8	PTPN20A
NETO1	AMER1	GJA4	CLEC3A
C18orf63	AMER2	PCBD2	KIR2DL3
FAM69C	AMER3	ZNF319	ATP6V0A1
DLK1	AMFR	RTBDN	BMP1
DIO3	AMH	KXD1	LOXL3
HSP90AA1	AMHR2	TOMM40L	SGCA
WDR20	AMICA1	INPP5J	LIMS3
MOK	AMIGO1	NCKAP5L	SLC6A8
TRAF3	AMIGO2	AMPD2	MBD1
LBHD2	AMIGO3	RND2	PLXND1
TRMT61A	AMMECR1	PKP2	FAM193A
KLC1	AMMECR1L	GDI1	ATG2A
ZFYVE21	AMN	AC016559.1	RNF4
C14orf180	AMN1	ISM1	BCKDHB
ADSSL1	AMOT	C5orf60	C14orf25
GPR132	AMOTL1	FAM219A	TMEM53
GOLGA6L6	AMOTL2	CCDC64	LOC100132707
NIPA1	AMPD1	MOCS1	VWA5B1
GOLGA6L1	AMPD2	SUGP1	RTF1
GOLGA6L2	AMPD3	TGFB1	ATP13A1
NPAP1	AMPH	SCAMP4	INPP5J
GOLGA8F	AMT	ANXA11	MTTP
GOLGA8G	AMTN	KIR3DL3	GDF6
CHRFAM7A	AMY2B	TSPAN9	MUC12
CHRNA7	AMZ1	GPX7	DAGLA
GOLGA8K	AMZ2	BBC3	TTYH2
GREM1	ANAPC1	UBE2E2	UBE4B
FMN1	ANAPC11	PARS2	LOC150197
NUTM1	ANAPC15	NAPRT1	ACE
GOLGA8A	ANAPC16	DNAH10OS	VPS54
GOLGA8B	ANAPC2	ZNF202	SAPS3
NANOGP8	ANAPC5	PSKH1	SLC4A8
RASGRP1	ANAPC7	FCHSD1	LOC84856
BAHD1	ANG	PPM1G	C1orf81
CCDC32	ANGEL1	KRTAP10-9	KHK
C15orf62	ANGEL2	PPTC7	BCOR
DLL4	ANGPT1	CCDC163P	MOBP
EXD1	ANGPT2	CHST15	PLXNB3
CHP1	ANGPT4	WNK4	ZNF417
RTF1	ANGPTL2	ENDOV	USH1C
GANC	ANGPTL4	KRTAP10-2	ZNF365
ZNF106	ANGPTL6	DUSP23	C11orf49
SNAP23	ANGPTL7	TRUB2	PAX8
LRRC57	ANHX	SLC5A10	PPP1R1B
HAUS2	ANK1	NGFR	GPR97
UBR1	ANK2	BCL9L	AK1
CCNDBP1	ANK3	ZGPAT	OSBPL10
ADAL	ANKAR	PPP6R3	TNFRSF10B
TUBGCP4	ANKDD1A	FOXI1	GH1
HYPK	ANKEF1	PRELP	BBS9
WDR76	ANKFN1	LY6K	MPST
DUT	ANKFY1	JPH4	LMNA
COPS2	ANKH	ISCA1	WNK4
FGF7	ANKHD1	FUT1	P4HB
HDC	ANKIB1	PCYOX1L	GSDMD
TRPM7	ANKK1	SEZ6	XPNPEP2
SCG3	ANKLE1	PSG6	PPM1M
TMOD2	ANKLE2	TMEM30B	RUSC1
MAPK6	ANKMY1	SCGB3A1	VASN
GNB5	ANKMY2	USF1	KIF21B
ZNHIT3	ANKRA2	FNTB	CNOT4
GGNBP2	ANKRD1	TNS4	KIF3C
DHRS11	ANKRD10	STEAP3	MYOF
SYNRG	ANKRD11	NDRG3	SIGLEC15
CWC25	ANKRD12	TMEM97	SECTM1
CACNB1	ANKRD13A	TBC1D10A	TMEM59
STAC2	ANKRD13B	CRX	ADC
FBXL20	ANKRD13C	KIR3DL2	LOC642846
MED1	ANKRD13D	NFE2L1	PKP2
PGAP3	ANKRD16	SFRP2	HNRNPL
ORMDL3	ANKRD17	METTL7A	PMCHL1
CASC3	ANKRD18A	CKM	CP
KRT10	ANKRD2	AP000350.10	PHLDB1
KRT9	ANKRD22	AKT3	SPATA3
HAP1	ANKRD24	TMEM63C	CCDC157
NKIRAS2	ANKRD26	TNRC18	FAM41AY2
DHX58	ANKRD27	PLEKHF1	MOSPD3
MLX	ANKRD28	LRRC4B	C1QC
RETREG3	ANKRD29	KIR2DL4	HEATR2
TUBG1	ANKRD30A	BCL2L1	TUBB6
WNK4	ANKRD31	FIBCD1	MS4A15
PSME3	ANKRD32	LRRD1	ACCN4
NBR1	ANKRD33	CELF5	HGF
TMEM106A	ANKRD34A	RP11-385D13.1	SYT13
CD300LG	ANKRD34B	DOT1L	LOC150776
LSM12	ANKRD35	BCKDK	SOX10
UBTF	ANKRD36	PARN	LOC399491
GPATCH8	ANKRD36B	PHLDA3	CCDC130
DBF4B	ANKRD36C	UNC5C	MAN1B1
GJC1	ANKRD37	GNG3	RFX2
EFTUD2	ANKRD40	CELF6	RAPGEF2
CCDC103	ANKRD42	RAB11B	TM9SF4
NMT1	ANKRD44	NMB	CSK
ARHGAP27	ANKRD46	FGF19	GPBP1
ARL17A	ANKRD52	EFHD2	CXCL17
GOSR2	ANKRD53	UPK2	CLIP2
EFCAB13	ANKRD54	TCTE1	KIAA0564
NPEPPS	ANKRD55	S100A7	SMARCE1
CDK5RAP3	ANKRD6	EFNA1	NCKAP5L
CBX1	ANKRD66	AMER3	ZFYVE1
SKAP1	ANKRD9	FBXO4	FLJ46361
HOXB5	ANKS1A	KLF15	LYST
CALCOCO2	ANKS3	TEX261	RAP1GAP
NGFR	ANKS4B	NRSN2	G6PC3
TAC4	ANKS6	TIFAB	KRTAP4-7
XYLT2	ANKUB1	TMEM109	FAM98C
PUSL1	ANKZF1	TNS1	PBX1
CCNL2	ANLN	WNT3A	ME2
TMEM240	ANO1	LHX6	KSR1
SKI	ANO10	S100PBP	SC4MOL
MMEL1	ANO2	TMEM74B	GUCA1A
TPRG1L	ANO3	SNX1	HPX
PLEKHG5	ANO5	KIR2DL1	WLS
NOL9	ANO6	NUTM2E	TLX3
UTS2	ANO7	STAT6	FCF1
ERRFI1	ANO8	KIR2DL3	A4GALT
SPSB1	ANO9	CAMKV	LOC374491
CTNNBIP1	ANP32B	C14orf1	CADM3
LZIC	ANPEP	CCDC135	BEST1
NMNAT1	ANTXR1	DLX4	TMEM231
FBXO6	ANTXR2	RAB11FIP1	TRANK1
MTHFR	ANXA10	AP3S1	TRMT61A
NPPB	ANXA11	AZGP1	NDRG3
MFN2	ANXA13	IPO5	FCHSD1
C1orf158	ANXA2R	RTP1	KIR3DL1
FHAD1	ANXA4	LSM12	SHMT1
SLC25A34	ANXA5	CDCP1	NECAB2
FBXO42	ANXA8	CDR2L	KIR3DL2
PADI3	ANXA9	HSPB1	GRIN1
PAX7	AOAH	PDCD1	C14orf41
MRTO4	AOC1	SNX15	STXBP2
OTUD3	AOC2	SEC24D	RARG
PLA2G2D	AOC3	RAB7L1	GNAS
FAM43B	AOX1	FAM132B	C15orf56
ALPL	AP000349.2	PAQR8	RNF122
LDLRAD2	AP006285.3	STK35	THUMPD1
WNT4	AP1B1	USH1G	S100A11
EPHA8	AP1G1	ZBTB7C	KRT222
LUZP1	AP1G2	CYP4F22	NFYC
E2F2	AP1M1	CEP41	MAX
PITHD1	AP1M2	AL117190.3	ARHGDIA
SRSF10	AP1S1	HYOU1	PDE6G
TMEM139	AP1S2	CCDC40	GREB1
TPK1	AP1S3	AC110619.2	PTPLAD1
CNTNAP2	AP2A1	ZSCAN22	MYO1C
C7orf33	AP2A2	CNPY3	VDAC2
ZNF862	AP2B1	CKLF-CMTM1	RGPD5
TMUB1	AP2M1	PEX26	ZGPAT
MCPH1	AP2S1	ANAPC2	ITPRIP
ANGPT2	AP3B1	C11orf80	RPL28
SPAG11B	AP3B2	MRPS17	GALE
RP1L1	AP3D1	GPSM3	B4GALT4
CTSB	AP3M1	MIF4GD	LOC100271832
DEFB134	AP3M2	NUMBL	LOC441204
ZNF705D	AP3S1	FCRL6	GOLGA6L7P
SLC7A2	AP3S2	MAP2K7	GH2
SH2D4A	AP4E1	NCKAP1L	RER1
SLC18A1	AP4M1	PLK1	SLC22A13
LZTS1	AP4S1	LMO1	BMI1
XPO7	AP5B1	MYO1C	CASP8
BMP1	AP5M1	GPC1	EDAR
BIN3	AP5S1	TMEM257	SLC5A5
CHMP7	AP5Z1	CTC-260F20.3	TRIP13
CCDC25	APAF1	AR	CLEC18A
ELP3	APBA1	TNFSF15	POLK
EXTL3	APBA2	CILP	BAGE2
KIF13B	APBA3	RBBP8NL	TNFSF15
UBXN8	APBB1	SLC25A34	PAPSS2
RAB27A	APBB1IP	KCNC3	SLC25A4
PIGBOS1	APBB2	MTFMT	TMEM50A
DNAAF4	APBB3	KIF21B	SLC37A1
PYGO1	APC	ZNF578	C15orf55
POLR2M	APC2	OMP	ZNF385B
ANXA2	APCDD1	SEPT3	MRPL11
ICE2	APCDD1L	FXYD6	TMEM150A
VPS13C	APCS	NHP2	KMO
APH1B	APEH	PDDC1	FBXO44
DAPK2	APELA	A4GALT	MEF2A
SNX22	APEX1	TSPAN15	FADS6
CSNK1G1	APEX2	ZNF783	SLC35F2
SPG21	APH1A	CRIP2	GAS2L2
MTFMT	APH1B	FGD2	EFNB3
CLPX	API5	ZNF709	LOC100132062
PARP16	APIP	MLLT1	MBNL2
DPP8	APITD1	GTF2E1	KCNMA1
DIS3L	APITD1-CORT	LIMS3L	ELOVL1
AAGAB	APLF	KIF21A	METTL7A
ITGA11	APLN	C2CD3	2022-09-09
MYO9A	APLNR	TRABD	TMPRSS12
GRAMD2A	APLP1	F7	C11orf9
HEXA	APOA1	PRSS8	WASH7P
GOLGA6B	APOA1BP	GALNT10	C10orf110
CD276	APOA2	ZKSCAN2	FXYD6
GOLGA6A	APOA4	ARHGAP23	RSPH6A
CPLX3	APOA5	CCDC117	USP48
SCAMP2	APOB	OTP	MRPL30
RPP25	APOBEC2	IL19	BCKDHA
GOLGA6C	APOBEC3A	AL953854.2	CLLU1
PTPN9	APOBEC3C	TPBGL	AP2A2
NRG4	APOBEC3D	ZNF771	ATP6V0C
SCAPER	APOBEC3F	HKR1	CABIN1
IREB2	APOBEC3G	TSPAN17	OS9
TMED3	APOBEC3H	PPM1M	ZNF823
CTXND1	APOBEC4	CERS4	HAX1
CEMIP	APOBR	C19orf25	KIAA1328
CFAP161	APOC1	ZMIZ1	PTGER3
GOLGA6L10	APOC2	C11orf88	LMCD1
WHAMM	APOC4	SLC4A11	C14orf159
GOLGA6L4	APOC4-APOC2	TRPC6	SPOCD1
WDR73	APOD	PCBD1	GTSE1
NTRK3	APOF	KNDC1	POM121L8P
MRPS11	APOH	CCL21	FAM120B
ABHD2	APOL1	TRANK1	SLC34A1
RHCG	APOL3	UBALD1	PSMB11
ABCC3	APOL4	RAB7A	FAM64A
ANKRD40	APOL5	MAPRE2	TIMP2
SPAG9	APOL6	CISH	IDH3B
HLF	APOLD1	PMM1	THOC7
SRSF1	APOOL	CLEC2L	BBC3
DYNLL2	APOPT1	WASF2	PSMA2
MKS1	APP	ZNF329	RGPD6
SUPT4H1	APPBP2	DLG4	TRPC6
RNF43	APPL1	HLA-C	TPPP3
PPM1E	APPL2	MGRN1	RNF115
SKA2	APRT	C11orf86	PSKH1
YPEL2	APTX	NPTXR	SIRT6
VMP1	AQP1	URAD	LYSMD1
RPS6KB1	AQP10	CABP7	ERGIC1
APPBP2	AQP11	FOSL2	SPDYE2
BRIP1	AQP12A	CORO7-PAM16	RAB11FIP1
MRC2	AQP12B	HAPLN3	BTN3A2
CCDC47	AQP2	HIF3A	FAM115C
PRR29	AQP4	C22orf39	MCM5
ERN1	AQP5	SAMD10	PBX3
DDX5	AQP6	CATSPER1	GLG1
LRRC37A3	AQP7	CYB561A3	CLEC11A
MAP2K6	AQP8	GATA4	C9orf66
CD300LF	AQP9	MAP2K2	GLCCI1
USH1G	AQPEP;	NRN1	ATP11B
HID1	AQR	LMOD1	FCRL6
ARMC7	AR	RP11-644F5.10	PHF15
MIF4GD	ARAF	BRF1	RASD2
RECQL5	ARAP1	MUC5B	LARP1B
SAP30BP	ARAP2	UNC5CL	DIP2B
ACOX1	ARAP3	STYXL1	EPC1
EXOC7	ARC	TNFAIP8L2	MRAS
RNF157	ARCN1	RTN3	ENOX1
PRPSAP1	AREL1	MUC12	DGCR2
UBE2O	ARF1	KCNQ4	S1PR5
CYGB	ARF3	SEPT9	CXXC4
PRCD	ARF6	USP37	FBXO21
ST6GALNAC2	ARFGAP1	ECHDC3	SH2B3
MXRA7	ARFGAP2	SERTAD2	LRRC18
AFMID	ARFGEF1	CASKIN1	CD79B
RBFOX3	ARFGEF2	DMRT2	ZNF598
ENDOV	ARFIP1	KCNAB3	C2orf42
NPTX1	ARFIP2	KIRREL2	RAB27A
ARL16	ARGLU1	SZRD1	HUS1
MCRIP1	ARHGAP1	TRIM67	ITSN1
CXorf36	ARHGAP10	CNNM3	CLYBL
SLC9A7	ARHGAP11A	GPR132	SAP30L
CDK16	ARHGAP11B	C10orf95	NLRC5
SYN1	ARHGAP12	RTCB	SNRPD3
ZNF630	ARHGAP15	IGFL1	KIF21A
SSX1	ARHGAP17	DBH	WFDC2
SSX4	ARHGAP18	FAM98C	LCK
SSX4B	ARHGAP20	SETD7	ELP2P
MAGIX	ARHGAP21	NKX3-2	MINK1
CLCN5	ARHGAP22	MASP2	MGC27382
DGKK	ARHGAP23	TNNI1	CD84
SSX7	ARHGAP24	SAE1	TYROBP
SSX2	ARHGAP25	PPT2	LOC255167
SSX2B	ARHGAP26	KCTD17	RAD54L2
FAM156A	ARHGAP27	TRIM40	LOC100131132
IQSEC2	ARHGAP28	ZFP64	SF4
RIBC1	ARHGAP29	AL450307.1	LRCH4
FAM120C	ARHGAP30	CLEC18B	LRRC37A
TSR2	ARHGAP31	WNK2	EPHA8
GNL3L	ARHGAP32	LDB1	CSTT
KLF8	ARHGAP33	DHX58	UGT3A1
SPIN4	ARHGAP35	USF2	FAM176A
ARHGEF9	ARHGAP36	NFAM1	RPH3A
ZC3H12B	ARHGAP39	OPA3	KIR2DS2
YIPF6	ARHGAP4	KLF13	S100A1
SNX12	ARHGAP40	ABI3	PABPC1L
FOXO4	ARHGAP44	CAMKK1	SLCO3A1
MED12	ARHGAP5	VAMP1	ADAMTS14
NONO	ARHGAP6	TMEM154	RHOA
CHM	ARHGAP8	STPG1	APOL1
PCDH11X	ARHGAP9	NPHP4	COL20A1
TSPAN6	ARHGDIA	TRIP13	UBA5
SYTL4	ARHGDIB	C18orf25	GPX3
NXF3	ARHGDIG	WDR81	LPCAT2
BEX2	ARHGEF1	PACS1	BAX
TSC22D3	ARHGEF10	ZNF418	LOC154092
NCBP2L	ARHGEF10L	CCDC38	RPAP2
POU2AF1	ARHGEF11	DRD2	MT4
SIK2	ARHGEF12	GAS2L2	ENTPD6
ALG9	ARHGEF15	LRRN4CL	C5orf20
NCAM1	ARHGEF16	RAPGEF5	GTPBP10
TMPRSS5	ARHGEF17	PYCARD	CDKAL1
RBM7	ARHGEF18	MYH13	PEAR1
PAFAH1B2	ARHGEF19	RNH1	CTDP1
CEP164	ARHGEF2	CLDN3	ZBTB17
TMPRSS4	ARHGEF25	ST8SIA2	LOC340113
SCN4B	ARHGEF26	DDX39A	NKAIN4
MPZL3	ARHGEF28	ASCL2	C11orf36
DDX6	ARHGEF37	POU2F3	SFI1
CXCR5	ARHGEF38	NDUFS7	CRIP2
PDZD3	ARHGEF39	SV2C	C22orf30
RNF26	ARHGEF4	OSBP2	CDT1
THY1	ARHGEF40	HOXD9	LOC338667
OAF	ARHGEF5	KRT83	NOP56
POU2F3	ARHGEF6	TMEM119	ZNF747
TBCEL	ARHGEF7	GPR144	TMEM132A
SORL1	ARHGEF9	SCD5	NME6
FEZ1	ARID1A	TRIM9	MMP14
SRPRA	ARID1B	ANKS1A	SERPINB8
KIRREL3	ARID2	CDIPT	MGC57346
TP53AIP1	ARID3A	RNF157	GPR87
SNX19	ARID3B	CTXN1	KIR2DS3
JAM3	ARID4A	TRIM62	CAPG
CACNA1C	ARID4B	MOSPD3	DNAI2
TIGAR	ARID5A	ITFG1	TFAP2D
C12orf4	ARID5B	ZNF213	MAP1LC3A
VWF	ARIH1	PKP1	USP37
LTBR	ARIH2	DCTN3	HAP1
VAMP1	ARIH2OS	CACNB2	DHRS4L1
NCAPD2	ARL1	ZYX	FLJ35390
MPV17L	ARL10	COL23A1	IL4R
XYLT1	ARL11	CPNE5	DKFZP434K028
CCP110	ARL13A	MBD1	SLC41A2
VPS35L	ARL14	RGPD1	ZNF169
IQCK	ARL14EP	SHISA7	C1orf192
DCUN1D3	ARL15	ZNF286B	PPP3CA
LYRM1	ARL16	FAM153C	TIAM1
ANKS4B	ARL17A	THNSL2	HIF3A
MOSMO	ARL17B	HGS	GORASP1
UBFD1	ARL2BP	RNF165	C19orf25
IL4R	ARL3	FAM83E	C10orf26
IL21R	ARL4A	AC022498.1	WHSC1L1
KIAA0556	ARL4C	GPIHBP1	CLSTN2
XPO6	ARL5A	C12orf43	KIAA0240
NFATC2IP	ARL6IP1	NACC2	FLAD1
SPN	ARL6IP4	CD40LG	ATP8A2
HIRIP3	ARL6IP6	RNF26	LOC285043
TBC1D10B	ARMC10	NUDT8	SIKE1
MYLPF	ARMC12	SOD3	NCRNA00203
ZNF785	ARMC2	ADAMTS17	ST5
FBRS	ARMC4	KDM6B	MRPL49
ZNF629	ARMC5	RGPD2	NCCRP1
FUS	ARMC6	ZFP69B	VEPH1
LOC107983990	ARMC7	ITIH6	PYY2
PHKB	ARMC8	AC104841.2	DDX11L10
ABCC11	ARMC9	DGAT1	DYNC1LI2
SIAH1	ARMCX2	NCCRP1	CD164L2
N4BP1	ARMCX3	SDS	SMTN
PAPD5	ARMCX4	CAPN14	BCAS3
SNX20	ARMCX5	RNPEPL1	PDIA6
CYLD	ARMCX6	CLEC18A	BSPRY
RPGRIP1L	ARMS2	TRPC4AP	NHP2
FTO	ARNT	CYB561D1	EGFR
MMP2	ARNT2	AGXT	ZNF215
SLC6A2	ARNTL	TNFSF9	CACNA1A
GNAO1	ARNTL2	KCNJ11	C17orf54
OGFOD1	ARPC1A	ADC	PCYT2
FAM192A	ARPC1B	TUBB6	TSNAX-DISC1
PLLP	ARPC2	SLC7A8	PTGDS
CCL22	ARPC3	KRT8	VDR
CIAPIN1	ARPC4	FAM102A	FBXL6
DOK4	ARPC5	MYT1	PLD1
KIFC3	ARPC5L	AL031666.2	SH3BP1
ZNF319	ARPIN	OPN1MW	CHRM2
CCDC113	ARPP19	CTA-299D3.8	DNAJC14
GINS3	ARPP21	TBX6	RELL1
NDRG4	ARR3	GLIS1	RAD9B
CMTM4	ARRB1	HCG27	ICMT
DYNC1LI2	ARRB2	DGKZ	MAP3K1
NCOA5	ARRDC1	IRS1	ISM1
PTGIS	ARRDC2	PRND	CEACAM3
SLC9A8	ARRDC4	PRDM6	OTUD5
RNF114	ARRDC5	PSMB11	FAM20A
ADNP	ARSA	GRID1	SLC30A3
SALL4	ARSB	CHRNA9	TBCE
TFAP2C	ARSD	ANKRD52	IQSEC1
CTCFL	ARSE	SLIT1	HIATL1
APCDD1L	ARSG	IL6R	GAB4
GNAS	ARSH	PRRX1	FLJ26850
PHACTR3	ARSI	TLDC2	WBP1
FAM217B	ARSJ	OPN1LW	COTL1
LSM14B	ART1	FAM53B	CCDC74B
OSBPL2	ART3	PPAP2B	PLK1
MRGBP	ART4	SZT2	TIMM16
YTHDF1	ART5	OPN1MW2	SLC7A13
BIRC7	ARTN	CD7	GMPPA
COL20A1	ARVCF	KAT5	PPP1R8
SRMS	ARX	MAP3K1	TSPYL4
GMEB2	AS3MT	ARL10	SLC16A1
DNAJC5	ASAH1	GRHL2	C1orf89
SAMD10	ASAH2	TMEM105	CRISPLD2
TCEA2	ASAH2B	RAB21	TNRC6A
PCMTD2	ASAP1	FLJ27365	ADAM23
SMIM11B	ASAP2	SUPT16H	KIR3DS1
KCNE1B	ASAP3	HES4	KCTD11
NRIP1	ASB1	SYNJ2	USP10
JAM2	ASB10	PTDSS2	TARDBP
KRTAP6-3	ASB11	PPM1F	HLA-J
HUNK	ASB13	ETV3L	YPEL1
C21orf62	ASB14	RHOD	HELB
IFNAR1	ASB15	MAP2K5	C17orf102
TMEM50B	ASB16	ROGDI	LOC253039
SLC5A3	ASB17	CAMK1G	ZNF589
KCNE1	ASB18	HUS1	C21orf99
RIPPLY3	ASB2	AC102948.2	PKNOX1
DYRK1A	ASB4	PHF19	LOC150786
ERG	ASB5	C10orf128	MLL4
B3GALT5	ASB7	TIAM1	C8orf31
BACE2	ASB9	LYNX1	FLJ43390
PCYOX1	ASCC1	HOXB6	LST1
ADD2	ASCC2	GNAO1	ARHGAP23
TEX261	ASCC3	CCDC157	RHBDF2
NAGK	ASCL1	DKFZP779L1853	PIWIL4
PAIP2B	ASCL5	CADM3	KIAA1279
EMX1	ASF1B	CHRAC1	NFE2L1
MTHFD2	ASGR1	VPS26B	RNF146
SEMA4F	ASGR2	TMEM125	RGPD2
TACR1	ASH1L	TMEM52	TSGA14
GCFC2	ASIC1	GRINA	COMT
KCMF1	ASIC2	MSL3	TNFRSF12A
ELMOD3	ASIC3	FAM178B	JRK
GGCX	ASIC4	ADAP2	CCDC74A
TMEM150A	ASIC5	CREB3L1	CTDSP1
POLR1A	ASIP	KIAA1614	CLDN6
PTCD3	ASL	FLAD1	ZNF691
MRPL35	ASMTL	AFAP1	PLA2G5
REEP1	ASNA1	SCO1	WFDC8
RGPD1	ASNS	HLA-B	LOC400696
PLGLB1	ASPA	OTUD5	CNPY3
PLGLB2	ASPDH	TBP	C14orf102
SMYD1	ASPG	RP11-247C2.2	APH1B
THNSL2	ASPH	EFHD1	USP9X
ZNF514	ASPHD2	ZFYVE1	LOC152225
NCAPH	ASPM	C11orf21	ZFP64
CNNM3	ASPN	S100A16	LOC100128593
SEMA4C	ASPRV1	KCTD12	LOC100286844
FAM178B	ASPSCR1	KCTD21	RFX4
AFF3	ASRGL1	CLEC18C	ADORA2A
LONRF2	ASTE1	LHX8	LOC388955
IL1RL1	ASTL	JMJD8	LPO
MFSD9	ASTN1	NCS1	TMEM189
RANBP2	ASTN2	FRMD8	AP4S1
ZC3H6	ASUN	TSPAN11	TUSC3
RGPD8	ASXL1	RSG1	SHQ1
CHCHD5	ASXL2	MORC2	FNTB
RABL2A	ASXL3	CPLX1	MBD3L5
SLC35F5	ATAD1	HSPB7	RAB3B
DPP10	ATAD2	GPLD1	MEAF6
DDX18	ATAD2B	CXCL17	ZMYM3
STEAP3	ATAD3A	ARHGAP32	DENR
EPB41L5	ATAD3B	CASKIN2	CIRH1A
TRMT13	ATAD3C	DAND5	RAB8A
CDC14A	ATAD5	NPFFR1	LRRC37A4
FNDC7	ATAT1	PIK3IP1	KIRREL3
TMEM167B	ATCAY	RAB42	CNNM3
C1orf194	ATE1	TTYH3	GPM6B
SORT1	ATF2	SULT1C4	STK32B
GSTM4	ATF3	RALGDS	FRMD8
GSTM2	ATF4	CTD-3193O13.9	CCDC69
GSTM1	ATF5	DHX34	TCTN2
GSTM3	ATF6	CECR6	PLEKHA8
AHCYL1	ATF6B	SESN2	BCL7A
DENND2D	ATF7	C11orf82	FAM149A
CHI3L2	ATF7IP	USP27X	PLS1
PIFO	ATF7IP2	NOL12	TMEM86A
WDR77	ATG10	SHROOM4	ZNF319
RAP1A	ATG12	BCAS1	DYNLL2
MAGI3	ATG13	AK4	VWA3B
HIPK1	ATG14	TRAF7	GPRC5C
SYT6	ATG16L2	MDK	GALNT10
TRIM33	ATG2A	RTF1	BRPF1
TSHB	ATG2B	FMNL2	HOXB6
CD101	ATG3	BCL9	ACAD8
TRIM45	ATG4A	C9orf114	SCAPER
FAM46C	ATG4B	SLC38A4	PRKRIR
GDAP2	ATG4C	C10orf67	RIPK1
REG4	ATG4D	DBN1	KIAA1751
PEX11B	ATG5	TMEM231	XPNPEP1
RBM8A	ATG7	KMO	IL17RB
LIX1L	ATG9A	PRDM7	PUM2
LOC105371242	ATG9B	PDXP	LOC100131496
LOC100996717	ATHL1	GPR68	SDR39U1
HIST2H2BE	ATIC	IRF7	SH2D1B
ECM1	ATL1	IRF1	C7orf16
CTSS	ATL2	ZBTB7A	ZKSCAN2
PRUNE1	ATL3	RARG	TMEM185B
BNIPL	ATM	AP1G1	ZFP42
CDC42SE1	ATMIN	ATF3	RAB27B
SEMA6C	ATN1	RPTOR	LENG8
TNFAIP8L2-SCNM1	ATOH1	FZR1	AGBL5
SCNM1	ATOH7	SYNGAP1	FAM101B
CGN	ATOH8	ALPL	C3orf67
TUFT1	ATP10A	FAM193B	SMOC1
RORC	ATP10B	WNT7B	KLF2
CWF19L1	ATP10D	NTSR1	AFF3
BLOC1S2	ATP11A	MAF1	ATP7A
WNT8B	ATP11AUN	SLC25A20	IL20RB
MRPL43	ATP11B	NKX6-1	QRICH2
KCNIP2	ATP11C	C16orf96	TPRG1
SUFU	ATP12A	POTEM	PIAS1
ARL3	ATP13A1	SH2D7	COBRA1
NT5C2	ATP13A2	TRAM2	GRID1
SH3PXD2A	ATP13A4	SH3D19	TMEM62
MXI1	ATP13A5	OTOS	ZNF232
RBM20	ATP1A1	PRKCB	ACOT8
ACSL5	ATP1A2	SPRYD4	F7
VTI1A	ATP1A3	CDK9	LHX6
CASP7	ATP1A4	CTDSP1	ACCN2
DCLRE1A	ATP1B1	LARP4	CHKB
ABLIM1	ATP1B2	GCM1	NPDC1
HSPA12A	ATP1B4	NGEF	ARHGEF12
RAB11FIP2	ATP2A1	ZNF571	TOMM40L
CACUL1	ATP2A2	ALDH1L1	LOC100129973
TIAL1	ATP2A3	POTEG	ASB6
INPP5F	ATP2B2	CCDC69	RNF123
MCMBP	ATP2B3	FADS6	CNOT2
ARMS2	ATP2B4	ELL	NPAS2
BUB3	ATP2C1	CCNF	CXCL16
CHST15	ATP2C2	CEACAM19	SPATA16
FAM53B	ATP4A	TMEM52B	GSR
EDRF1	ATP5A1	PNMA6A	OSBP2
UROS	ATP5B	ITIH4	OPA3
ADAM12	ATP5C1	TRIM5	BRD3
FAM196A	ATP5D	PNMA6C	L2HGDH
EBF3	ATP5E	AMHR2	ISG20
LRRC27	ATP5EP2	CLCF1	RMST
PWWP2B	ATP5G2	FABP6	CPLX4
ZNF511	ATP5G3	DHX8	ATP1A2
BET1L	ATP5J	SLC17A9	DYNLL1
IFITM3	ATP5J2	ADAP1	HAPLN3
RASSF7	ATP5J2-PTCD1	ACOT11	SNX33
TMEM80	ATP5S	ATPAF1	B4GALNT1
PNPLA2	ATP5SL	PGM5	LDLRAD1
MOB2	ATP6AP1	RELA	TMCC3
KRTAP5-5	ATP6AP1L	RSPH6A	CORO1A
NAP1L4	ATP6C	ZNF629	CCS
EIF2B1	ATP6V0A1	PAX5	GRINA
GTF2H3	ATP6V0A2	BCKDHB	DLGAP4
ZNF664	ATP6V0A4	BOC	IL1F8
NCOR2	ATP6V0B	SOX10	TMEM164
TMEM132B	ATP6V0C	PFKFB4	CISD1
SLC15A4	ATP6V0D1	PRR14L	CCDC108
ZNF605	ATP6V0D2	NPAS2	ARMC5
ZNF84	ATP6V0E1	QRICH2	MPV17
ZNF268	ATP6V0E2	PYCRL	DOK3
TPTE2	ATP6V1A	TWIST2	GALNTL1
PSPC1	ATP6V1B1	CX3CL1	WRB
SAP18	ATP6V1B2	CSK	HSPB1
SKA3	ATP6V1C1	ZDHHC3	FAM134C
MTMR6	ATP6V1C2	GIPC3	LASP1
ATP8A2	ATP6V1D	PHC2	PHYHD1
WASF3	ATP6V1E1	ZNF490	C2orf54
GPR12	ATP6V1E2	SNAPC2	TYK2
PDX1	ATP6V1G2	TPPP3	PMCHL2
SLC46A3	ATP6V1G3	ZC3H12B	FAM153A
KATNAL1	ATP6V1H	AP1M1	CPEB1
UBE2L5	ATP7A	SUB1	EFNA3
B3GLCT	ATP7B	NPDC1	RAB3A
DCLK1	ATP8A1	COPE	CCDC22
ELF1	ATP8B1	YJEFN3	TMEM125
DGKH	ATP8B2	AURKB	DZIP1
TNFSF11	ATP8B3	CDK18	HUWE1
CCDC122	ATP8B4	ARSH	EIF2C1
NUDT15	ATP9A	PALM	AATK
CYSLTR2	ATP9B	KRT82	TAPBP
EBPL	ATPAF1	FXYD1	CD276
TRIM13	ATPAF2	IPP	FGFR1
TMEM272	ATR	DMPK	KCNAB2
UTP14C	ATRAID	C21orf90	CACNA1S
VPS36	ATRIP	RAB15	CHST15
DIS3	ATRN	TCF15	SDS
SOX21	ATRX	DLGAP3	GPR171
DZIP1	ATXN1	CCDC146	NPTX1
UBAC2	ATXN1L	RANBP3	HIST1H2BN
HKR1	ATXN2	BACE2	SERPINB4
ZNF793	ATXN2L	ZFP36L1	CXorf36
ZFP30	ATXN3	ZNF33A	SSPO
YIF1B	ATXN3L	SCAMP5	NRSN2
SPRED3	ATXN7	PTGER1	CXCR5
HNRNPL	ATXN7L1	CCDC106	ADAMTS7
RINL	ATXN7L2	TMEM117	CCDC163P
MED29	ATXN7L3	SYT6	ITGA3
PLEKHG2	ATXN7L3B	EDN3	ADAM19
ZNF546	AUP1	LIX1L	AP1G1
ZNF780B	AURKA	PAX3	PAX3
C19orf47	AURKB	STMN3	C21orf63
C19orf54	AURKC	C17orf50	KRT8
CYP2B6	AUTS2	AC006946.15	DUSP18
AXL	AVIL	PFKFB2	RPL31
CEACAM7	AVL9	BDKRB2	MICAL3
POU2F2	AVPI1	AZI1	CHGA
CXCL17	AVPR1A	TIMP3	B3GAT1
CEACAM1	AVPR1B	CCDC42B	NCOA7
ZNF284	AVPR2	NR2F1	MAZ
CEACAM19	AWAT1	DBF4B	PDE9A
BLOC1S3	AWAT2	RAB19	CASP10
CD3EAP	AXDND1	NICN1	FAM72D
ERCC1	AXIN1	TSPYL4	ADAMTSL4
FOSB	AXIN2	PNMA5	TOR2A
IGFL1	AXL	AGPAT3	NSUN7
HIF3A	AZGP1	RAD52	KRTAP10-9
CARD8	AZI2	PCYT2	SLC4A7
KDELR1	AZIN1	HOXD11	SDF2
FAM83E	AZIN2	NCK2	LOC170425
FUT1	AZU1	YPEL3	GNPTAB
CD37	B3GALNT1	GABRA3	ZCCHC16
SYT14	B3GALNT2	SNAPC4	RASGRF1
KCNH1	B3GALT1	ARHGAP19-SLIT1	INF2
NEK2	B3GALT2	ICA1L	C17orf76
LPGAT1	B3GALT4	SLC38A11	STC1
ATF3	B3GALT5	IL2RA	AZGP1
NSL1	B3GALT6	ING1	SYNGAP1
FLVCR1	B3GALTL	VSTM4	LOC90110
GPATCH2	B3GAT1	DCAF15	LENEP
RRP15	B3GAT2	RNF144A	LOC387646
BPNT1	B3GAT3	CD28	SYCE1
RAB3GAP2	B3GNT1	ARMC5	APOL6
BROX	B3GNT3	CTNS	LOC100128338
FAM177B	B3GNT4	KCNK3	ACAD9
DEGS1	B3GNT5	SERGEF	RTCD1
SRP9	B3GNT6	HTRA3	GTF2E1
SDE2	B3GNT7	ZNF280C	CLPS
MIXL1	B3GNT8	EPS8L2	ATXN2
STUM	B3GNTL1	ACACB	ST8SIA4
JMJD4	B4GALNT1	MBD3L4	KALRN
TRIM17	B4GALNT2	MBD3L3	CKB
GALNT2	B4GALNT3	MBD3L2	YY1
C1orf198	B4GALNT4	VDAC2	DDX11L1
ARV1	B4GALT1	PHF12	HPS1
DISC1	B4GALT2	CCSAP	DNMT3A
RBM34	B4GALT3	SLC41A2	KIAA1324L
TBCE	B4GALT4	MLC1	IRS1
GNG4	B4GALT5	ZNF286A	MAP3K10
LGALS8	B4GALT6	DDX11	BPY2
MAP1LC3C	B4GALT7	RORC	SHOX
AKT3	BAALC	FAM195A	C15orf27
COX20	BAAT	INF2	LRRTM1
EFCAB2	BABAM1	TSPAN18	ACACB
KIF26B	BACE1	STK32B	SFRP2
ZNF670	BACE2	TMCC3	C3orf65
GCSAML	BACH1	MSMO1	PGM5
OR2T10	BACH2	STIM1	PRKCI
SH3BP5L	BAG2	TNK2	NARF
ACP1	BAG3	BRK1	NTRK3
CMPK2	BAG5	PRKCI	UBXN2B
KIDINS220	BAG6	GDF6	C17orf87
MBOAT2	BAHD1	HIST1H2AM	C2orf71
HPCAL1	BAI1	CD276	THADA
TERB1	BAI2	MBD3L5	SYT7
CBFB	BAI3	ATL2	FABP6
E2F4	BAIAP2	FAM195B	PIK3C2G
TPPP3	BAIAP2L2	PVRL4	RGS14
ATP6V0D1	BAIAP3	DPYSL2	CILP
GFOD2	BAK1	ATF7IP2	USP40
RANBP10	BAMBI	HAP1	MACROD2
DPEP2NB	BANF1	RAET1E	C11orf21
NFATC3	BANF2	FOXO6	CBR4
SLC7A6	BANK1	GSX1	ZNF787
SMPD3	BANP	ZNF660	RAET1E
SNTB2	BAP1	PHF15	PNMA3
NIP7	BARD1	MAX	NR2F1
TERF2	BARHL1	MAPK11	NTRK2
WWP2	BARHL2	KRTAP10-1	ZFYVE28
PDPR	BARX1	KIF3C	ATP8B2
EXOSC6	BASP1	FAM153A	LOC100133331
ATXN1L	BATF2	SLITRK1	ZNF571
TXNL4B	BATF3	GLTSCR1	CTCF
PSMD7	BAX	NFYC	KIAA1199
ZNRF1	BAZ1A	ASF1B	CLEC18C
TMEM170A	BAZ1B	MYADM	GPR114
CHST6	BAZ2A	RNPS1	RANBP17
KARS	BAZ2B	AL626787.1	LOC284628
CNTNAP4	BBC3	DCLRE1B	ANO9
MON1B	BBOX1	MEX3A	TEX28
NUDT7	BBS1	STOX2	SH2D4B
CENPN	BBS12	GPR161	SCAF1
ATP2C2	BBS2	CDH24	STAG3L3
KIAA0513	BBS4	C4orf36	SLC25A37
EMC8	BBS5	RNF208	GPC4
FOXF1	BBS7	B4GALNT3	SEC14L2
FBXO31	BBS9	TAP2	FAM124B
CYBA	BBX	SHOX2	C7orf59
GALNS	BCAM	GGT5	TEP1
TRAPPC2L	BCAN	RAB8A	GLRX3
ACSF3	BCAP29	GRIA1	MLF2
ZNF778	BCAP31	UBE2QL1	DCAF7
SPATA2L	BCAR1	ETV6	COL4A5
RPH3AL	BCAR3	EFCAB4A	FOXN3
VPS53	BCAS1	SORCS2	ANKS1A
TIMM22	BCAS2	PTP4A2	SRP72
ABR	BCAS3	TMEM86A	DPYSL2
MYO1C	BCAS4	PER2	PRPF40B
PITPNA	BCAT1	APOL2	IL17REL
DPH1	BCAT2	PPP1CA	LOC100129196
SRR	BCCIP	ZNF19	FAT3
SGSM2	BCDIN3D	ELN	CNTD1
METTL16	BCKDHA	RP11-463J10.2	OSTalpha
PAFAH1B1	BCKDHB	C19orf35	CLEC18B
RAP1GAP2	BCKDK	ASPA	NELF
SHPK	BCL10	XPNPEP2	HCRTR2
NCBP3	BCL11A	UNC5A	YES1
CAMKK1	BCL11B	HIATL1	MRPL4
ATP2A3	BCL2	FGF7	TRIM69
ANKFY1	BCL2L1	YWHAH	PTP4A2
UBE2G1	BCL2L10	RUNX1T1	CCNF
MYBBP1A	BCL2L11	KCTD13	LASS4
SMTNL2	BCL2L12	TRIM46	ZNF517
MED11	BCL2L13	NHLH1	ZC3H10
CXCL16	BCL2L14	DAK	NOD1
FMNL3	BCL2L2	ATXN7L1	WASH3P
AQP6	BCL2L2-PABPN1	MMS19	CDH26
CERS5	BCL3	ZFP42	LOC643401
METTL7A	BCL6	PML	SFRS16
KRT80	BCL6B	CXCR5	DENND5A
KRT2	BCL7A	RPIA	TBC1D10A
KRT4	BCL7B	ALG12	WSB1
EIF4B	BCL7C	ZBTB42	MAPK13
AMHR2	BCL9	MLPH	DOCK10
PRR13	BCL9L	ZNF275	EVX1
PCBP2	BCLAF1	TEAD3	DERL3
ATF7	BCO1	PPIF	LOXL2
CALCOCO1	BCOR	SLC12A9	TYSND1
CBX5	BCORL1	TMPRSS6	GPR88
MMP19	BCR	TBC1D3F	CEACAM8
PYM1	BCS1L	TBC1D3	MASP1
RPL41	BDH1	WDR74	CDC42BPG
RNF41	BDKRB1	ZBTB20	FLJ35220
STAT2	BDKRB2	IL17RB	FAM72B
APOF	BDNF	GPR88	FAM83E
SPRYD4	BDP1	MGST2	CRABP2
RBMS2	BEAN1	SYPL2	FLJ22184
BAZ2A	BECN1	FSD2	NLK
DCTN2	BEGAIN	C17orf102	FGD2
TSPAN31	BEND2	SLC38A7	C20orf151
AVIL	BEND3	OLR1	SETD7
SLC16A7	BEND4	SMIM14	PLLP
PPM1H	BEND6	UBXN2B	HBP1
AVPR1A	BEND7	SLC9A3	NR1I3
GNS	BEST1	GPR133	USP15
IRAK3	BEST2	NOVA2	ZDHHC21
MDM1	BEST3	LGI2	CXCR6
MDM2	BEST4	TBX3	RAB6B
LYZ	BET1	DTD2	SEMA6D
FRS2	BET1L	NMUR1	SCO1
RAB3IP	BEX4	SLC6A17	ASPHD1
THAP2	BEX5	GPR39	PLAC4
TMEM19	BFSP1	SSH2	LPIN3
TBC1D15	BFSP2	TMEM151B	CLN6
ATXN7L3B	BGLAP	MAP1A	C12orf51
KRR1	BGN	USP2	GJA4
DAOA	BHLHA9	LRRC10B	IGF2BP3
FAM155A	BHLHB9	ISX	KCTD13
NAXD	BHLHE22	NKX6-3	HTRA3
TUBGCP3	BHLHE23	SNED1	USH1G
PCID2	BHLHE40	CHST11	AMIGO1
ADPRHL1	BHLHE41	TCN2	KCTD10
TFDP1	BHMT2	CTCF	TMPRSS6
POTEM	BICC1	ZNF793	LOC400043
NDRG2	BICD1	P4HB	MLLT4
HNRNPC	BICD2	NFATC3	BMP2
SUPT16H	BID	GRIPAP1	KIAA0146
RAB2B	BIK	MXRA7	SHISA6
PABPN1	BIN1	SLC35E2B	BICD1
NGDN	BIN2	APOL1	TMEM11
CBLN3	BIRC5	GPR97	TMEM8A
SDR39U1	BIRC6	GLCCI1	ADD1
GZMH	BIRC7	SCXA	BTNL3
AP4S1	BIRC8	IGDCC3	SLC4A11
AKAP6	BLACE	AVPR1B	SUZ12
SNX6	BLCAP	LPGAT1	P2RX5
KIAA0391	BLK	COBL	STAT6
TRAPPC6B	BLM	LARGE	FBXO46
VCPKMT	BLMH	ATP13A1	ROBO4
TMX1	BLNK	FJX1	PTGDR
STYX	BLOC1S3	SCXB	CLTC
YAE1D1	BLOC1S4	ZHX3	ZNF609
GLI3	BLOC1S5-TXNDC5	DUSP13	ANKRD11
DBNL	BLOC1S6	AGAP1	LOC400019
POLM	BLVRB	CNNM4	C20orf96
YKT6	BLZF1	RMND5B	MUC15
TMED4	BMF	ELOVL1	SNRNP200
ZNF713	BMI1	CDC42BPB	FBXO4
CHCHD2	BMP1	GRK1	RANBP10
ZNF736	BMP10	PTPRN	LOC339674
CALN1	BMP2	DMRTA2	FLJ40330
BCL7B	BMP2K	PQLC1	C9orf173
DNAJC30	BMP3	PLCH2	CDCP1
STX1A	BMP4	ENSG00000270466	ETV3L
EIF4H	BMP5	HPS1	LOC550643
GTF2IRD2	BMP6	GUCD1	C6orf47
RCC1L	BMP7	TCTA	ATP2B1
GTF2IRD2B	BMP8A	NRDE2	SH2D7
SPDYE5	BMP8B	GNA11	GSTM5
UPK3B	BMPER	LPCAT2	LOC643406
SPDYE16	BMPR1A	LDOC1L	KIR2DL5A
PCLO	BMPR1B	AAED1	DUSP7
SEMA3E	BMPR2	EMILIN3	EEF2K
CROT	BNC1	NUDT18	CCDC42B
KRIT1	BNC2	SLC16A3	ALPL
RBM48	BNIP1	RPRD2	SCD5
FAM133B	BNIP3	ZNF516	IAH1
BET1	BNIPL	SLC25A53	RNF222
PPP1R9A	BOC	DKFZP434H0512	MAOA
SLC25A13	BOD1	HIST2H2BF	2022-09-05
TECPR1	BOD1L1	PKIG	CYBASC3
CPSF4	BOD1L2	SLC35F2	TXNRD2
FAM200A	BOK	KLK15	LAS1L
ACPP	BOLA1	BPIFA2	RELA
CDV3	BOLA2	OSBPL7	GPR68
IL20RB	BOLA2B	ASB16	FLJ44635
DBR1	BOLL	HSD17B8	RNF208
ARMC8	BPHL	NPLOC4	RGS12
NME9	BPI	LAT2	SETD1A
PXYLP1	BPIFA1	ACSF3	C1QL1
RASA2	BPIFA2	MEST	TBX6
TFDP2	BPIFA3	PAK4	MEF2D
PLSCR2	BPIFB1	IRF3	COPS7B
WWTR1	BPIFB2	PRR26	CLDN4
CLRN1	BPIFB3	CRAT	UBP1
SUCNR1	BPIFB4	SYVN1	NDUFV3
RAP2B	BPIFB6	NFIC	SYT11
C3orf33	BPIFC	FAM127A	CA6
LEKR1	BPNT1	CEND1	PAQR8
KPNA4	BPTF	MMP14	C17orf53
NMD3	BRAF	CYGB	NDUFA10
SPTSSB	BRAP	FAM107A	DHX58
SLC7A14	BRAT1	KLF16	FLJ42393
RPL22L1	BRCA1	LENG8	CISD2
TMEM212	BRCA2	PRRC2B	PPP4C
FNDC3B	BRD1	ZNF669	CACNA2D2
NLGN1	BRD2	XRCC3	CREG1
PIK3CA	BRD3	COL4A5	EFNA1
USP13	BRD4	FAIM2	TCN2
PEX5L	BRD7	BLK	CALCA
DCUN1D1	BRD8	RAD9B	HLA-H
KLHL6	BRD9	IFT140	SPDYE8P
MAP6D1	BRDT	KPNB1	FAM155B
MAP3K13	BRF1	CLIP2	PCDHB19P
TMEM164	BRF2	B4GALT5	TOM1L1
LRCH2	BRI3	SVOP	CD48
CXorf56	BRI3BP	ZNF837	IGFL1
UBE2A	BRICD5	RNASE13	PCBD2
ZBTB33	BRINP1	MPV17	SIGLECP3
LAMP2	BRINP2	SHISA6	DGCR8
MCTS1	BRINP3	BANF2	SORD
GLUD2	BRIP1	FAM163A	ZFHX2
XIAP	BRMS1L	MAP3K9	ZNF706
TEX13C	BROX	TRAF1	COL4A6
ZDHHC9	BRPF1	MNT	SYNGR1
ZNF280C	BRPF3	DCP1A	PDLIM7
HPRT1	BRS3	GPR114	GRID2
FAM122C	BRSK1	NXF1	MPPED2
ZNF75D	BRSK2	MMGT1	LYNX1
INTS6L	BRWD1	LYST	ADSSL1
MAP7D3	BRWD3	SLC25A29	DDX17
MCF2	BSCL2	PDAP1	ITFG1
SLITRK4	BSDC1	TREML2	ZNF511
FMR1	BSG	CLDN6	JPH1
CXorf40A	BSN	DNAH17-AS1	LCN12
CXorf40B	BSND	SNX33	FAM188B
HMGB3	BSPRY	TRIM29	2022-03-02
VMA21	BST1	PES1	LOC440416
CETN2	BTAF1	KCNMA1	PSMD12
ATP2B3	BTBD10	PROKR2	CAMLG
DUSP9	BTBD11	AMIGO1	AGK
SLC6A8	BTBD16	WNT6	MBD3L2
MECP2	BTBD17	ZBTB8OS	C20orf46
DNASE1L1	BTBD18	PRKACA	MT3
TAZ	BTBD19	PTMA	LOC730668
GAB3	BTBD2	PTGIR	FLT4
RAB39B	BTBD3	PAPL	FMNL1
LOC389831	BTBD6	KCNA6	NDN
POLR2F	BTBD7	UGCG	DUSP23
SOX10	BTBD8	ITPRIP	MMP7
LOC400927-CSNK1E	BTBD9	GPR153	TRMU
CSNK1E	BTF3L4	TMPRSS12	TMEM27
CBX6	BTG2	KLF17	TEX261
CBX7	BTK	GIT1	AXL
SYNGR1	BTLA	CALM3	PHYHIP
MIEF1	BTN1A1	ZBTB16	TMEM229B
FAM83F	BTN2A1	WIPF2	SERHL2
TNRC6B	BTN2A2	LRRC52	LOC100126784
SLC25A17	BTN3A1	C14orf180	CDK9
ZC3H7B	BTN3A2	ZNF687	CAMK1G
DESI1	BTN3A3	EIF2S3	CDH24
2019-09-03	BTNL3	FAM196B	MTFMT
POLDIP3	BTNL8	RGS9BP	NCRNA00207
PACSIN2	BTNL9	EGFR	BGN
SULT4A1	BTRC	ZMYM3	TRIM9
NUP50	BUB1	KANK2	RPL15
KIAA0930	BUB1B	MRPS18A	MUC3A
FAM118A	BUD13	RAD51L3-RFFL	LOC100287098
ZBED4	BUD31	COX18	PAX1
PIM3	BVES	MTA3	FAM71D
PANX2	BYSL	NDUFV3	MS4A8B
MAPK11	BZRAP1	COL14A1	FLJ44313
MAPK8IP2	BZW2	RASL10B	GRHL2
RABL2B	C10orf10	AC093802.1	SDHAF2
LOC102724770	C10orf105	SULT1B1	ADAMTS13
PLCXD1	C10orf11	RGR	PARVA
SHOX	C10orf111	F11R	PYCR1
XG	C10orf12	ADAMTS14	ITIH1
NLGN4X	C10orf120	CCDC137	FARP1
PUDP	C10orf128	ATE1	ZNF527
GPR143	C10orf2	ROBO2	PCYOX1L
MID1	C10orf25	ASIC1	ANGPTL6
TLR8	C10orf32	MEF2D	CDIPT
TCEANC	C10orf32-ASMT	MAST3	SMARCC1
GEMIN8	C10orf53	TMEM164	ATF7IP2
CA5B	C10orf54	PVRIG	MYO18B
CTPS2	C10orf67	HTR7	COL23A1
TXLNG	C10orf71	C10orf11	LOC157381
BEND2	C10orf76	FLJ45079	USE1
PDHA1	C10orf82	ITFG3	ZDHHC5
SH3KBP1	C10orf88	ACADSB	C16orf45
BCLAF3	C10orf90	MAN1A2	OFD1
MBTPS2	C10orf91	EMX1	TCL6
ACOT9	C10orf95	IQSEC2	CNR2
EIF2S3	C10orf99	ZNF697	ZNF213
PDK3	C11orf1	L2HGDH	LOC440894
PCYT1B	C11orf16	VSIG1	C12orf73
TMEM47	C11orf21	SETD8	CASC2
DYNLT3	C11orf24	TMEM185B	SNCB
CXorf38	C11orf30	EFCAB6	VCP
TMEM74	C11orf31	ZNF850	PLA2G4F
SAMD12	C11orf42	MPST	LONP2
COLEC10	C11orf44	SYDE2	NMB
WDYHV1	C11orf45	GPRIN2	CHD2
ZNF572	C11orf49	RGS3	NXF1
ST3GAL1	C11orf53	PLXND1	C18orf34
AGO2	C11orf54	NSG2	SRGAP1
TSNARE1	C11orf63	OGDH	DUSP13
JRK	C11orf65	ATP6V1G2	TOR3A
ZFP41	C11orf68	NSUN7	TNFAIP8L2
ZNF623	C11orf70	LELP1	PARS2
FOXH1	C11orf73	SPACA7	PELI3
MFSD3	C11orf80	C10orf111	ZNF490
ZNF251	C11orf84	REXO1L1	ZAK
FOXD4	C11orf85	GLI3	CKM
CBWD1	C11orf87	ZNF726	LOC283731
GLIS3	C11orf91	KLF7	DNAJB6
TTC39B	C11orf94	CDC34	RAMP3
SNAPC3	C11orf95	APOLD1	DPP9
BNC2	C12orf10	TBR1	ZMAT2
CNTLN	C12orf4	CIAPIN1	WNT4
ACER2	C12orf40	AL354898.1	ARHGEF17
MTAP	C12orf42	SORD	FAM159A
ELAVL2	C12orf43	C7orf65	QSOX1
LRRC19	C12orf49	SSNA1	ING1
C9orf72	C12orf5	RAD23A	HDGFRP3
APTX	C12orf56	BMP8A	DSCR10
LCE1B	C12orf65	TOB2	RABEPK
LCE6A	C12orf66	TM9SF4	INO80E
SPRR2D	C12orf73	CBLB	DNAJB5
SPRR2G	C12orf74	SMYD5	PAK3
INTS3	C12orf76	KIAA1199	SNED1
TPM3	C12orf77	FAM155B	NOL3
UBAP2L	C12orf79	AL590822.2	LY6E
ATP8B2	C14orf1	ZNF609	P704P
IL6R	C14orf119	KCNIP2	RGPD4
SHE	C14orf159	DPPA3	SNN
ADAR	C14orf166	DDA1	C11orf88
PMVK	C14orf169	FLYWCH1	PGS1
FLAD1	C14orf177	RNF121	CCDC93
EFNA3	C14orf180	SH2B3	SUPT16H
MEX3A	C14orf183	GDNF	MYO7A
SMG5	C14orf2	SMTN	KIR2DL5B
MEF2D	C14orf37	DGCR6L	HOXC13
RRNAD1	C14orf39	CDC42BPG	CBLB
PEAR1	C14orf79	TBC1D2B	SSFA2
FCRL5	C14orf80	DUSP3	VTI1A
FCRL1	C14orf93	REEP3	SCGB3A1
CD1D	C15orf27	CBX6	KCNJ11
PYHIN1	C15orf32	ACVRL1	HHLA2
CADM3	C15orf39	KLC2	BMP6
PIGM	C15orf40	NUDT13	MRPS7
PEX19	C15orf41	ETV3	C2CD3
NHLH1	C15orf52	PTPLB	C18orf45
SLAMF6	C15orf54	MAZ	HOXA11
CD84	C15orf56	GAB4	SLC7A6
SLAMF1	C15orf57	HTR6	GPR179
F11R	C15orf59	ABCF2	SPRR2A
DEDD	C15orf61	DTX3L	C17orf48
TOMM40L	C15orf62	CRYAB	PITPNC1
PCP4L1	C15orf65	ABCC12	DIP2C
SDHC	C16orf13	ZNF710	SUB1
ATF6	C16orf45	SECTM1	ICA1L
C1orf226	C16orf46	FZD10	MNX1
SH2D1B	C16orf54	FNDC1	FAM36A
DDR2	C16orf58	MCUR1	HDHD2
FCGRT	C16orf59	NTNG2	POLR2F
CLEC11A	C16orf62	ATAD3C	GRAMD1A
KLK3	C16orf70	SNN	C1orf125
KLK9	C16orf71	PTPLAD1	RNF26
LIM2	C16orf72	C11orf84	CHRNE
SIGLEC6	C16orf78	LPIN3	KIAA0913
ZNF577	C16orf86	SERHL2	MAN1A2
ZNF432	C16orf87	SETD1B	PER2
ZNF766	C16orf89	FRMD1	LOC150527
ZNF880	C16orf91	CLSTN1	FSD1
ZNF528	C16orf92	LINC00908	CLCN6
ZNF534	C16orf93	BPIFA1	ARHGAP32
ZNF578	C16orf95	LAS1L	MYADML2
ZNF808	C17orf102	CHURC1-FNTB	FER1L5
ZNF611	C17orf104	STX1B	OXR1
LILRA5	C17orf105	C3orf70	LOC283314
LAIR1	C17orf107	MYBPC1	KRTAP10-2
LENG8	C17orf47	KIAA1244	VWF
LILRA1	C17orf49	TAZ	TMEM214
GP6	C17orf50	AC104809.3	MASP2
RDH13	C17orf51	LCNL1	EFHC2
COX6B2	C17orf53	RPL27A	BEST3
EPN1	C17orf59	OPHN1	PAX4
ZFP28	C17orf62	TSNARE1	PNCK
PEG3	C17orf64	GLTSCR1L	LZTS2
DUXA	C17orf70	SLC5A2	AGBL4
ZNF264	C17orf75	APLN	PRUNE2
ZNF805	C17orf78	CLIP3	C11orf51
ZNF460	C17orf82	ZADH2	JUP
ZNF749	C17orf85	ARF3	PRSS22
ZNF772	C17orf96	EIF4EBP1	ZNHIT3
ZIK1	C17orf97	SLC7A5	FBXL17
ZNF530	C17orf99	PHLDB1	HCP5
ZNF211	C18orf25	C19orf48	ZNF646
ZNF776	C18orf32	UBTF	NUP188
ZNF552	C18orf54	SH3RF3	CDC5L
ZNF587	C18orf63	RBM38	DDX11L2
ZNF814	C18orf65	CNTNAP3B	C11orf86
ZNF418	C19orf12	C16orf72	EIF4E2
SRXN1	C19orf24	MAFK	ZSCAN22
UBASH3A	C19orf25	CDYL2	CARD6
RRP1B	C19orf26	ZNF587	SERGEF
TSPEAR	C19orf35	ARL4C	RECQL5
KRTAP10-11	C19orf38	SETBP1	PYGB
UBE2G2	C19orf40	STX17	KCNK1
SUMO3	C19orf43	C9orf62	RDH8
PCBP3	C19orf44	TNFAIP2	CXCR2
C21orf58	C19orf45	DNAJB8	F10
IL17RA	C19orf47	LRTOMT	DKFZP434I0714
ADA2	C19orf48	AXL	TMEM30B
BCL2L13	C19orf53	FAM101B	NBPF9
PEX26	C19orf54	ANK1	PRRX1
DGCR6	C19orf57	LIG3	UBR2
TXNRD2	C19orf60	ZNF429	RNASE7
DGCR8	C19orf66	SYT13	NHEJ1
CRKL	C19orf68	ZNF878	NPM1
UBE2L3	C19orf70	KCNJ2	CCDC110
YPEL1	C19orf73	INHA	PROP1
MAPK1	C19orf80	HS6ST1	SPDYE6
PPM1F	C1D	BICD2	HLA-L
RAB36	C1GALT1	C1orf226	SLITRK1
DRICH1	C1QA	CTDSP2	SRM
MMP11	C1QB	TMEM185A	ALDOA
DERL3	C1QBP	LYPD6B	INPP5B
SPECC1L	C1QC	CGN	COBL
GUCD1	C1QL1	STMN2	CAPN14
SGSM1	C1QL2	COL6A2	CELF2
GRK3	C1QL3	TMEM235	SS18L1
ASPHD2	C1QL4	ZSCAN12	MAF1
HPS4	C1QTNF1	ACVR1B	DUSP10
ZNRF3	C1QTNF2	SYT11	C10orf54
GAS2L1	C1QTNF3	PHF8	SPATS1
NIPSNAP1	C1QTNF3-AMACR	LRRC47	LOC285540
NF2	C1QTNF4	TMPRSS4	C19orf50
MTMR3	C1QTNF5	CELSR2	MRPL37
LIF	C1QTNF6	LZTS1	SQSTM1
TBC1D10A	C1QTNF7	CALN1	ZNF709
CCDC157	C1QTNF8	MRPL10	RDH5
TCN2	C1QTNF9	LCLAT1	PKP1
RNF185	C1R	TMEM179	CNPY4
RASD2	C1RL	PDZD7	CDK2AP1
PVALB	C1S	BCORL1	INO80B
IL2RB	C1orf100	PACS2	OBP2B
SSTR3	C1orf101	CLDN4	CASKIN2
MFNG	C1orf105	FAXDC2	TRPC1
EDF1	C1orf106	GORASP1	KLC4
PAXX	C1orf109	AATK	TMCO4
SSNA1	C1orf110	PHF7	DRD2
RNF224	C1orf111	RP11-831H9.11	LSM4
NSMF	C1orf112	CD99L2	CRAT
ZMYND11	C1orf115	MCM4	FLJ39582
LARP4B	C1orf116	SRPX2	SUZ12P
ADARB2	C1orf122	FAM19A3	AFAP1L2
KLF6	C1orf127	KCNIP3	SDAD1
AKR1C2	C1orf145	NUDT19	C1orf70
IL2RA	C1orf146	ZNF574	SYDE2
PFKFB3	C1orf158	MEIS3	SNX15
SFMBT2	C1orf159	CELF2	JAK3
KIN	C1orf162	PIGQ	GTPBP4
CAMK1D	C1orf167	TNFRSF8	EIF2C4
CCDC3	C1orf174	AC112693.2	HGS
UCMA	C1orf177	FAF2	PTGIR
FAM107B	C1orf186	PDGFRB	ARFGAP1
ACBD7	C1orf194	NMNAT1	PPAP2B
FAM171A1	C1orf195	C1QL2	TGM7
RSU1	C1orf198	RHBDF2	DTX1
TRDMT1	C1orf204	NLE1	KIF7
TMEM236	C1orf21	ALG10B	FANCD2
PLXDC2	C1orf210	PGAP3	LMOD1
C10orf67	C1orf216	SLC24A3	LOC646999
KIAA1217	C1orf226	NHSL2	TRIP6
ACBD5	C1orf228	RASA3	C1orf131
WAC	C1orf229	RER1	CYP4A11
MTPAP	C1orf27	TAOK2	CCDC114
ZEB1	C1orf50	SYNJ1	SPEG
KIF5B	C1orf54	FAM3A	FBXL18
NRP1	C1orf56	EMP2	LOC100128977
CREM	C1orf64	RAP2B	TTLL11
ZNF33A	C1orf74	CBX8	C15orf39
ZNF37A	C1orf85	DRG2	UBE2CBP
ZNF33B	C1orf86	CXCL9	C6orf176
RET	C1orf87	ARHGAP17	RABL2A
RASSF4	C1orf94	B9D1	TRPC2
SYT15	C1orf95	MCCD1	DDN
LOC102724488	C2	TRIM22	STMN2
NPY4R2	C20orf141	PRKCSH	EFHD2
FRMPD2	C20orf173	LRRC3	LOC100134368
C10orf128	C20orf194	RFFL	GDF5
C10orf53	C20orf195	DMTN	TGFB1
ERI3	C20orf196	TRAFD1	C9orf9
EIF2B3	C20orf197	ZSCAN10	AIFM2
CCDC163	C20orf24	HPGDS	C15orf42
CYP4A11	C20orf27	SCMH1	ZBTB24
CYP4A22	C21orf33	FADS2	SNRPB
TAL1	C21orf58	CRTC1	MMP28
TTC39A	C21orf62	GPR50	FLJ41941
PRPF38A	C21orf91	MMP15	CD28
LRP8	C22orf15	FOXB1	CATSPER1
MROH7	C22orf23	STARD3	EN2
PARS2	C22orf24	FBXW9	CNOT3
PLPP3	C22orf29	PRF1	AIG1
CYP2J2	C22orf39	CHST13	TXNDC6
NFIA	C22orf42	ATCAY	ZNF124
AK4	C22orf46	ADM2	WASF2
LEPR	C2CD2	FAM188B	MARS
LEPROT	C2CD2L	OTOP3	EIF2B3
TCTEX1D1	C2CD3	ABL1	ITIH5L
IL23R	C2CD4A	ZC3H12A	GRIN2A
SERBP1	C2CD4C	C3orf65	TRIM5
GADD45A	C2CD4D	ICOS	COL6A2
WLS	C2orf15	FOXN1	LOC151009
LRRC7	C2orf16	FASTK	NUDT8
HHLA3	C2orf27A	DEFB118	PRINS
PIGK	C2orf27B	ADORA1	EN1
ADGRL2	C2orf42	OSBPL10	GRB2
LPAR3	C2orf43	CENPP	TBC1D7
C1orf52	C2orf44	UBE2W	ARL8A
DDAH1	C2orf47	GREB1	PCGF1
ZNHIT6	C2orf48	ZNF488	MSX1
GBP4	C2orf49	TMEM102	WAS
RPAP2	C2orf50	WIZ	APOBEC3C
TMED5	C2orf54	DNAJC5	PTRH1
TPI1	C2orf57	TWF2	UHRF1BP1
NANOG	C2orf66	FXYD4	RASGRP3
ZNF705A	C2orf68	HSF1	UNC5CL
KLRG1	C2orf70	PRUNE2	SLC25A26
CLEC2D	C2orf73	C11orf49	LOC100286938
CD69	C2orf76	ZNF99	KLHL7
CLEC12B	C2orf81	ZNF517	ADARB2
OLR1	C2orf83	WDFY4	CDK5R1
TAS2R20	C2orf88	SNPH	NSUN3
LRP6	C2orf91	CAMK1D	PLEKHM2
CREBL2	C3	LRRC14B	HLA-F
GPRC5A	C3AR1	CCM2L	PSMD9
FAM234B	C3orf14	C12orf74	DAND5
GSG1	C3orf17	GABRA4	C20orf4
ATF7IP	C3orf18	SHC2	LOC284581
H2AFJ	C3orf20	ADCY9	NPL
ART4	C3orf22	SLC34A2	GSS
PTPRO	C3orf35	NPNT	TOM1
EPS8	C3orf36	FGFR1	RNASE4
LMO3	C3orf38	MTSS1L	AKAP1
AEBP2	C3orf52	PRSS27	GLE1
SLCO1A2	C3orf56	ARHGAP39	ACOX3
PYROXD1	C3orf58	DFFB	MAN2A2
ABCC9	C3orf62	H1FNT	ABCF2
ST8SIA1	C3orf67	TTC22	DNM2
KRAS	C3orf70	AC005609.1	C1orf112
LMNTD1	C3orf80	SMARCC1	HSD17B12
PPFIBP1	C4A	SKA1	NPHP4
KLHL42	C4B	TOM1L2	MSX2
IPO8	C4BPA	CHD5	UBE2QL1
TSPAN11	C4BPB	CBX5	KLHL25
DENND5B	C4orf17	MLST8	KIR3DL3
BICD1	C4orf19	DISC1	WDR11
ALG10	C4orf22	RP11-242G20.1	HOXA11AS
GXYLT1	C4orf26	CEACAM3	ANTXRL
PPHLN1	C4orf3	PLA2G2D	CDHR3
PUS7L	C4orf32	HAGHL	PAXIP1
IRAK4	C4orf33	TCL1B	KCNA6
ANO6	C4orf46	TPH1	NDUFS7
ARID2	C4orf50	ITGA3	DYRK1A
SLC38A1	C4orf6	LRP8	NOTCH2
SLC48A1	C5	SKAP1	TNFRSF1A
HDAC7	C5AR1	LIN28A	KIR2DL2
WNT10B	C5AR2	TMEM213	RFXAP
TPPP	C5orf22	SLC1A2	TBX5
UBE2QL1	C5orf24	FEV	CCDC7
PAPD7	C5orf30	DUSP22	VNN3
C5orf49	C5orf34	NEDD4	PRND
FAM173B	C5orf38	TMEM50A	FBLIM1
ANKRD33B	C5orf42	OXTR	HOXD9
FAM105A	C5orf45	HMHA1	LOC100144602
MYO10	C5orf47	ARRB1	GUCA2B
CDH10	C5orf49	ARHGEF9	FBXO24
GOLPH3	C5orf51	SSBP3-AS1	LOC284900
SUB1	C5orf55	YPEL2	SELS
RAI14	C5orf56	UBAP1	APPBP2
SPEF2	C5orf60	TRH	RASL10A
UGT3A1	C5orf66	PLD3	ORAI3
SKP2	C6	ZBTB37	BAZ1B
RANBP3L	C6orf1	SKI	PPIA
EGFLAM	C6orf10	POU2F1	PMS2L5
LIFR	C6orf106	HAPLN4	GPLD1
OSMR	C6orf118	INSRR	C10orf67
PTGER4	C6orf132	ZNF526	CGN
TTC33	C6orf136	TMCC2	CRKL
PRKAA1	C6orf141	LIFR	ZNF329
PLCXD3	C6orf165	RAP1GAP	C21orf2
C5orf51	C6orf195	SIGMAR1	TSHZ1
CCDC152	C6orf201	DUSP15	ZCCHC18
CCL28	C6orf211	VANGL1	GLTSCR1
EMB	C6orf222	LITAF	KDM6B
ITGA2	C6orf223	RHOT2	CECR6
GZMK	C6orf226	SLC24A2	KLF17
GPX8	C6orf25	KREMEN1	PLAGL2
MAP3K1	C6orf47	COL4A6	ADAMTS17
SETD9	C6orf48	RASGRF1	CCL4
PLK2	C6orf52	VWC2L	RBKS
GAPT	C6orf57	MEMO1	MAPKAPK2
SGTB	C6orf58	CDK2AP1	LILRP2
SERF1B	C6orf62	RBPMS	SSNA1
SERF1A	C6orf89	CDK16	LHX8
NAIP	C7	C10orf62	ZNF710
GTF2H2	C7orf25	SGTA	SETD6
ARHGEF28	C7orf26	CPQ	GRAP2
COL4A3BP	C7orf31	ATF5	DCBLD1
POLK	C7orf34	RGS19	ASF1B
WDR41	C7orf50	FAM228A	RAB3GAP2
LHFPL2	C7orf55	TMEM253	FAM123C
MTX3	C7orf55-LUC7L2	SMARCC2	SPOCK3
SPZ1	C7orf57	LHX4	MAG
RASGRF2	C7orf61	C19orf66	PNP
SSBP2	C7orf62	PLLP	EHD3
ATG10	C7orf69	DENND1C	DNAJC24
PBX1	C7orf71	PLA2G4F	DYNLRB1
UCK2	C7orf72	TMEM54	CHST2
POGK	C8A	PIK3R2	MACROD1
TADA1	C8B	PPAP2C	ZNF814
POU2F1	C8orf22	C15orf37	C20orf118
MPZL1	C8orf31	PRCC	AANAT
MPC2	C8orf33	PPARGC1B	ARAF
TIPRL	C8orf34	GLE1	CHMP1A
XCL1	C8orf37	UNC119B	XYLT2
VAMP4	C8orf44	PDE4B	DHCR7
ANKRD45	C8orf44-SGK3	CTDP1	PMM1
RC3H1	C8orf46	USP6	COPS6
PAPPA2	C8orf58	PABPC3	FAM122A
BRINP2	C8orf59	BCL2	PCDHB9
ABL2	C8orf74	NCDN	MAST3
SOAT1	C8orf82	GBA	LOC100134822
CEP350	C8orf86	SBK1	VPS25
STX6	C9	KDM4B	CARD14
CACNA1E	C9orf114	RAI1	TNRC18
SMG7	C9orf116	ATP2A3	FAM102A
COLGALT2	C9orf117	MYO7B	ZWINT
C1orf21	C9orf129	DLGAP2	ZDHHC9
ODR4	C9orf131	KRTAP10-6	CFLAR
CDC73	C9orf139	LHX5	TARS2
NEK7	C9orf152	SGOL1	DIS3L2
KIF21B	C9orf156	DIP2B	HTR1D
PKP1	C9orf16	C9orf66	SHISA5
CSRP1	C9orf163	MKNK2	ROBO2
NAV1	C9orf173	SLC39A7	FAM66D
PPP1R12B	C9orf24	ESCO2	GRIPAP1
SYT2	C9orf3	C19orf24	C9orf86
RABIF	C9orf40	DYNLRB1	FAM157A
MYOG	C9orf41	SLC22A6	TMEM97
CHIT1	C9orf47	GRAP	RTEL1
BTG2	C9orf50	PLEKHM2	AKT3
PRELP	C9orf62	PDZD3	LMO1
ZC3H11A	C9orf64	KBTBD13	NUDT13
PLEKHA6	C9orf66	C17orf70	ASXL1
MDM4	C9orf72	DLX3	TREH
CNTN2	C9orf78	PDE2A	ANKFY1
RAB7B	C9orf85	GPR157	LHX9
AVPR1B	C9orf89	TNFRSF10B	ADCY9
FCMR	C9orf9	RAB26	VWA3A
PIGR	C9orf91	LHX9	LOC730811
PFKFB2	CA1	SIGLEC12	TNFAIP2
C4BPA	CA10	PCDH1	ZBTB7A
MYCT1	CA11	CRTC2	LOC344887
MTRF1L	CA12	OLFML2A	RNF144A
SNX9	CA13	DOK7	TMEM151B
GTF2H5	CA14	TSPAN4	SPTAN1
SYTL3	CA3	ZNF395	SMARCD3
IGF2R	CA4	STRADA	GABRE
SLC22A3	CA5A	C9orf69	FHL5
PLG	CA5B	ERBB2	C17orf103
RPS6KA2	CA6	CAPG	MLH1
TCP10L2	CA7	LPAR5	MLEC
TCP10	CA8	LYPD3	SERPINE1
FAM120B	CA9	EDA2R	CECR7
SUN1	CAB39L	SIGLEC8	XGPY2
ADAP1	CABIN1	CLEC3A	LOC158435
GPER1	CABLES1	VANGL2	BTBD12
ZFAND2A	CABLES2	ACACA	DDX11L9
MAFK	CABP1	XYLT2	ITGA4
SNX8	CABP2	CTSE	PCDHB11
GNA12	CABP4	C6orf195	SPRYD4
CARD11	CABP5	SMIM3	WDR25
FOXK1	CABP7	DAGLB	NR2E3
MMD2	CABS1	ADAMTS13	SESN2
SLC29A4	CACFD1	NHEJ1	SERF2
CYTH3	CACHD1	AC010327.2	FAM160B1
PHF14	CACNA1A	NKAIN1	NKX3-2
ETV1	CACNA1B	NXPH4	ANKRD13D
AHR	CACNA1C	DOCK3	ZNF418
TWISTNB	CACNA1D	MED29	PHF8
STEAP1B	CACNA1E	MAPKAPK2	KLF15
CREB5	CACNA1F	ZC3H4	C5orf4
CHN2	CACNA1G	SPTB	KCNG1
FKBP14	CACNA1H	STARD5	NF1
PLEKHA8	CACNA1I	TMEM132E	GAPT
MTURN	CACNA1S	SLAMF6	SLC39A13
MINDY4	CACNA2D1	THOP1	CD14
PDE1C	CACNA2D2	KIFC2	SLC25A42
FKBP9	CACNA2D3	AC093677.1	PNMA6A
ELMO1	CACNA2D4	PHOX2A	BCL9
DDHD1	CACNB1	DLGAP4	CSNK2A2
GMFB	CACNB2	SF3B3	CRX
AP5M1	CACNB3	SKP2	C22orf41
ACTR10	CACNB4	PLIN4	WFDC12
DACT1	CACNG1	DKFZP761J1410	DCTN3
JKAMP	CACNG2	TRAM1L1	TIMM50
PPM1A	CACNG3	LPAR3	RTP1
AKAP5	CACNG4	SLC22A11	SLC29A4
CHURC1	CACNG5	ZNF589	CLIP3
ARG2	CACNG6	FANCC	SBNO2
RAD51B	CACNG7	KIF7	BTBD2
SYNJ2BP	CACNG8	AKT2	ZNF362
MED6	CACTIN	ZXDA	GPR111
TTC9	CACUL1	ANKLE1	ACP6
MAP3K9	CACYBP	MON1B	TUBA4B
PCNX1	CAD	ABI3BP	CHEK1
RGS6	CADM1	AP3B2	ZNF808
PSEN1	CADM2	VWA1	LLGL1
ENTPD5	CADM3	RBBP9	KCNAB3
ALDH6A1	CADM4	RAB2B	FANCC
VSX2	CADPS	USP15	TNK2
ISCA2	CADPS2	WEE2	RAG1
FCF1	CAGE1	CACNA1E	XIRP1
PROX2	CALCA	COL6A1	NODAL
ERG28	CALCB	MAPK13	RPIA
TGFB3	CALCOCO1	TPGS1	C14orf184
GPATCH2L	CALCOCO2	DENND1A	SNAPC2
VASH1	CALCR	BLOC1S2	MGC23270
CIPC	CALCRL	ZNF736	RAB42
POMT2	CALHM1	NXN	FGF19
NRXN3	CALHM2	SYT2	LOC728638
TSHR	CALM1	CPLX2	MAP1A
FLRT2	CALM2	LRRC20	ATG2B
KCNK10	CALM3	EIF3I	MS4A1
CALM1	CALML3	IRGQ	HLA-A
TC2N	CALML4	BTNL3	FBLN1
ATXN3	CALML5	IER3	SCNM1
CPSF2	CALN1	ACER2	PGPEP1
SLC24A4	CALU	AC007405.2	DNHD1
PRIMA1	CALY	STRC	SNCAIP
OTUB2	CAMK1D	TMPRSS11D	C9orf114
DICER1	CAMK1G	GTF3C4	GOSR2
CLMN	CAMK2A	ZNF665	FCGRT
ATG2B	CAMK2B	SLC41A1	LOC147004
AK7	CAMK2D	MTSS1	ERGIC3
SCN5A	CAMK2G	CDK5R1	PPARG
WDR48	CAMK2N1	B4GALNT1	RAB21
CSRNP1	CAMK2N2	AC137932.1	RAVER1
XIRP1	CAMK4	C5orf64	DIAPH2
MOBP	CAMKK1	FOXI2	LOC100128253
ZNF621	CAMKK2	THUMPD3	TMEM119
ULK4	CAMKMT	EFNB3	MSL3L2
TRAK1	CAMKV	SORBS1	CD2
SS18L2	CAMSAP1	BARHL1	EPHA6
HIGD1A	CAMSAP2	LY86	ACCN3
ANO10	CAMSAP3	H1FX	FAM73B
ABHD5	CAMTA1	SDC3	TTC21A
TCAIM	CAMTA2	CD5	ENO4
ZNF35	CAND1	METTL7B	DBF4B
KIAA1143	CAND2	MAN2B2	ILF3
ZDHHC3	CANT1	ARHGEF17	SARS2
LIMD1	CANX	RXFP2	FZD5
SLC6A20	CAP1	YPEL1	FAM185A
CCR9	CAP2	ATP2B4	EFNB1
PTPN23	CAPG	FOXN3	ERI1
TMA7	CAPN1	PER1	SLC35E4
PFKFB4	CAPN10	KRT79	LRRC43
IP6K2	CAPN11	DVL1	ARMC3
ARIH2	CAPN12	LETM1	MAGI3
RHOA	CAPN13	UBE4B	LOC400931
NICN1	CAPN14	PORCN	OAS2
BSN	CAPN15	PA2G4	PACS1
IP6K1	CAPN2	RP11-383H13.1	LOC285965
GNAT1	CAPN3	ZNF621	STAG3L4
LSMEM2	CAPN5	NR6A1	ANAPC2
CISH	CAPN6	SMCR8	BICD2
DUSP7	CAPN8	KRTAP4-6	ZNF552
POC1A	CAPN9	TNFRSF21	DDX51
ITIH4	CAPNS1	GALNT6	C12orf77
RFT1	CAPNS2	CTB-58E17.5	WNT3A
ARHGEF3	CAPRIN1	DBNDD2	LPPR2
IL17RD	CAPRIN2	PCBP4	BRD4
SLMAP	CAPS	FAM83F	RNASEL
NRG1	CAPS2	SPRYD3	NFASC
FUT10	CAPSL	ZNF362	HCRT
MAK16	CAPZA1	FKBP9	CXorf1
UNC5D	CAPZA2	STK10	ACBD4
BRF2	CAPZB	PPP2R2C	DLL1
LSM1	CARD10	B4GALT1	ZCCHC13
NSD3	CARD11	TRIM44	HSFYL1
C8orf86	CARD14	LDLR	SOST
PLEKHA2	CARD6	HGFAC	GPR144
ADAM18	CARD8	TMEM37	NEIL3
GOLGA7	CARD9	TRIM68	LZTR1
ANK1	CARF	CBX7	MRPS16
CHRNB3	CARHSP1	NOTUM	C5orf56
CHRNA6	CARKD	UQCRC1	C14orf1
EFCAB1	CARM1	SELL	CPN2
OPRK1	CARNS1	SSTR5	CCL18
PLAG1	CARS	WFDC12	POR
IMPAD1	CASC1	SAMD14	FLJ46111
ASPH	CASC10	ADD1	CHST11
C8orf44-SGK3	CASC3	CAPNS1	PRDM6
SGK3	CASC4	SLC25A15	ZNF280C
MCMDC2	CASC5	FURIN	RYR3
PREX2	CASK	RPL36	NEUROG1
NCOA2	CASKIN1	RPL28	SH3BP2
XKR9	CASKIN2	MOCS2	TTC16
EYA1	CASP1	CSTA	AMHR2
TERF1	CASP10	MT-ND4L	PCDHB15
UBE2W	CASP12	GANAB	GNA11
TMEM70	CASP14	TMEM236	GFER
JPH1	CASP2	ABLIM2	TNN
PI15	CASP3	SEC14L5	SNURF
TPD52	CASP4	CACNA1B	ZBTB1
ZNF704	CASP5	TMEM236	LOC100009676
ATP6V0D2	CASP6	SLMO1	LOC415056
CALB1	CASP8	SLC25A22	CALCB
OTUD6B	CASP9	HTR1D	C17orf55
GEM	CASQ1	COL26A1	IPO5
RAD54B	CASQ2	FAM71F2	C22orf39
FSBP	CASR	MYRF	CD40LG
DPY19L4	CASS4	SLC35C2	DDX11L5
PTDSS1	CAST	TUSC5	SLC22A7
MTDH	CASZ1	STRIP1	NBLA00301
KCNS2	CATIP	GALNT12	KIF18B
SNX31	CATSPER1	HRAS	TCF15
YWHAZ	CATSPER2	SNX27	GNG3
KLF10	CATSPER3	ULK3	LOC400568
RIMS2	CATSPER4	BLOC1S5	MGC34034
APBB2	CATSPERB	G6PD	ZBTB42
PHOX2B	CATSPERG	OR7D2	RAB1B
BEND4	CAV1	WSCD1	ENTPD5
DCUN1D4	CAV2	SYP	KLHDC7B
SGCB	CAV3	NEDD4L	PHF12
SRD5A3	CBFA2T2	MRPL11	CLPX
PAICS	CBFA2T3	KPNA4	OR11A1
SRP72	CBFB	OXGR1	OR10W1
GNRHR	CBL	FGF13	GPC1
MOB1B	CBLB	MTMR1	LOC100128076
EREG	CBLC	RP11-332O19.5	MSI1
THAP6	CBLL1	ID2	PMS1
PPEF2	CBLN2	SH2D4A	IFNAR1
SCARB2	CBLN3	ITPKA	ATXN7L1
ANTXR2	CBLN4	JPH2	CTGF
FGF5	CBR1	SNX24	CCDC41
SCD5	CBR4	ALAD	ADAMTS19
ABRAXAS1	CBS	SPNS1	MMP25
ARHGAP24	CBWD3	NBEAL2	LOC440297
MAPK10	CBX1	TPRA1	RCOR2
AFF1	CBX2	SLA2	C14orf45
NUDT9	CBX3	PIRT	TMEM140
PPM1K	CBX4	STX5	HMG20B
FAM13A	CBX5	AC104472.1	FLJ22536
TIGD2	CBX6	SMPD3	TCTA
[truncated: 13,609 more rows]
