# Supplementary material for: Comprehensive Analysis of hsa-miR-654-5p’s Tumor-Suppressing Functions
Source: Int J Mol Sci. 2022 Jun 8;23(12):6411. doi: 10.3390/ijms23126411 (PMC9224266; doi:10.3390/ijms23126411)
Supplement: Supplementary file 1 [file ijms-23-06411-s001.zip › Supp. Info. 4_275 genes_R2.xlsx]

## Sheet: Annotation
GeneList	Gene ID	Gene Symbol	Type of Gene	Description	Gene Location	Subcellular Location (Protein Atlas)
TMEM97	27346	TMEM97	protein-coding	transmembrane protein 97	chr17:28319200-28328685	Endoplasmic reticulum (Supported)
LSM12	124801	LSM12	protein-coding	LSM12 homolog	chr17:44067587-44034328	Cytosol (Approved)
RAVER1	125950	RAVER1	protein-coding	ribonucleoprotein, PTB binding 1	chr19:10333529-10316212	Nucleoplasm (Supported)
GPBP1	65056	GPBP1	protein-coding	GC-rich promoter binding protein 1	chr5:57174059-57264679	Cytosol;Vesicles (Approved); Additional: Plasma membrane
AKT3	10000	AKT3	protein-coding	AKT serine/threonine kinase 3	chr1:243851079-243488233	Cytosol (Supported)
ANKFY1	51479	ANKFY1	protein-coding	ankyrin repeat and FYVE domain containing 1	chr17:4263979-4163821	Endosomes (Enhanced)
ATF3	467	ATF3	protein-coding	activating transcription factor 3	chr1:212565407-212620777	Nucleoli;Nucleoplasm (Supported)
HHLA2	11148	HHLA2	protein-coding	HERV-H LTR-associating 2	chr3:108296548-108378285
GRIN2A	2903	GRIN2A	protein-coding	glutamate ionotropic receptor NMDA type subunit 2A	chr16:10182908-9753404
VTI1A	143187	VTI1A	protein-coding	vesicle transport through interaction with t-SNAREs 1A	chr10:112446988-112855368	Golgi apparatus;Vesicles (Supported)
ZBTB7A	51341	ZBTB7A	protein-coding	zinc finger and BTB domain containing 7A	chr19:4066899-4043303	Nucleoplasm (Approved)
CADM3	57863	CADM3	protein-coding	cell adhesion molecule 3	chr1:159171615-159203313
PBX3	5090	PBX3	protein-coding	PBX homeobox 3	chr9:125747373-125967377	Nucleoplasm (Approved); Additional: Cytosol;Nuclear bodies
PBX1	5087	PBX1	protein-coding	PBX homeobox 1	chr1:164559184-164886047	Nucleoplasm (Enhanced); Additional: Cytosol;Nuclear bodies
DZIP1	22873	DZIP1	protein-coding	DAZ interacting zinc finger protein 1	chr13:95644706-95578202	Centrosome;Nucleoplasm (Supported)
ZNF493	284443	ZNF493	protein-coding	zinc finger protein 493	chr19:21397133-21427577
ZNF490	57474	ZNF490	protein-coding	zinc finger protein 490	chr19:12610813-12576100
ATF7IP2	80063	ATF7IP2	protein-coding	activating transcription factor 7 interacting protein 2	chr16:10386061-10483638
PEAR1	375033	PEAR1	protein-coding	platelet endothelial aggregation receptor 1	chr1:156893718-156916429	Cell Junctions;Nucleoplasm (Approved); Additional: Centrosome
JPH1	56704	JPH1	protein-coding	junctophilin 1	chr8:74321540-74234700	Nucleoplasm (Enhanced)
MRPL49	740	MRPL49	protein-coding	mitochondrial ribosomal protein L49	chr11:65122183-65127371
DYNLL2	140735	DYNLL2	protein-coding	dynein light chain LC8-type 2	chr17:58083419-58095542	Cytosol;Nucleoplasm (Uncertain); Additional: Nuclear bodies
TOMM40L	84134	TOMM40L	protein-coding	translocase of outer mitochondrial membrane 40 like	chr1:161226060-161230746
MED29	55588	MED29	protein-coding	mediator complex subunit 29	chr19:39391378-39400641	Nucleoplasm (Supported)
SLC7A6	9057	SLC7A6	protein-coding	solute carrier family 7 member 6	chr16:68264526-68301819	Vesicles (Uncertain); Additional: Plasma membrane
RAPGEF2	9693	RAPGEF2	protein-coding	Rap guanine nucleotide exchange factor 2	chr4:159103079-159360173	Cytosol;Plasma membrane (Supported)
HAP1	9001	HAP1	protein-coding	huntingtin associated protein 1	chr17:41734646-41717739	Cytosol (Supported); Additional: Nucleoli
ATL2	64225	ATL2	protein-coding	atlastin GTPase 2	chr2:38378584-38293954	Endoplasmic reticulum (Supported)
SEZ6	124925	SEZ6	protein-coding	seizure related 6 homolog	chr17:29006440-28954905
CCNDBP1	23582	CCNDBP1	protein-coding	cyclin D1 binding protein 1	chr15:43185403-43197177	Nucleoplasm (Enhanced); Additional: Nuclear bodies
RECQL5	9400	RECQL5	protein-coding	RecQ like helicase 5	chr17:75667154-75626854	Nucleoplasm (Supported); Additional: Cytosol
MEF2D	4209	MEF2D	protein-coding	myocyte enhancer factor 2D	chr1:156500775-156463727	Nucleoplasm (Enhanced); Additional: Vesicles
MBD1	4152	MBD1	protein-coding	methyl-CpG binding domain protein 1	chr18:50281767-50266885	Nucleoplasm;Vesicles (Enhanced)
YPEL1	29799	YPEL1	protein-coding	yippee like 1	chr22:21735794-21697536
CXCL17	284340	CXCL17	protein-coding	C-X-C motif chemokine ligand 17	chr19:42442946-42428278
CXCL16	58191	CXCL16	protein-coding	C-X-C motif chemokine ligand 16	chr17:4739928-4733533	Golgi apparatus (Approved); Additional: Vesicles
MAP3K9	4293	MAP3K9	protein-coding	mitogen-activated protein kinase kinase kinase 9	chr14:70809513-70722526	Nucleoli;Nucleoplasm (Approved)
PCYT2	5833	PCYT2	protein-coding	phosphate cytidylyltransferase 2, ethanolamine	chr17:81911399-81900958	Cytosol (Approved); Additional: Nucleoplasm
PKP1	5317	PKP1	protein-coding	plakophilin 1	chr1:201283506-201332989	Nucleoplasm;Plasma membrane (Approved)
GRIA1	2890	GRIA1	protein-coding	glutamate ionotropic receptor AMPA type subunit 1	chr5:153489615-153813869
PFKFB4	5210	PFKFB4	protein-coding	6-phosphofructo-2-kinase/fructose-2,6-biphosphatase 4	chr3:48563136-48517684	Nucleoli (Approved)
BCL2L13	23786	BCL2L13	protein-coding	BCL2 like 13	chr22:17628877-17730855	Mitochondria (Enhanced)
MOBP	4336	MOBP	protein-coding	myelin associated oligodendrocyte basic protein	chr3:39467680-39529497	Cytoplasmic bodies (Supported)
STK38	11329	STK38	protein-coding	serine/threonine kinase 38	chr6:36547479-36493892	Cytosol (Approved)
AP4S1	11154	AP4S1	protein-coding	adaptor related protein complex 4 subunit sigma 1	chr14:31025106-31096450	Vesicles (Supported)
CD276	80381	CD276	protein-coding	CD276 molecule	chr15:73683944-73714514	Vesicles (Approved)
NEK9	91754	NEK9	protein-coding	NIMA related kinase 9	chr14:75127202-75079353
RABL2A	11159	RABL2A	protein-coding	RAB, member of RAS oncogene family like 2A	chr2:113627266-113643392	Centrosome (Approved); Additional: Vesicles
FOXN3	1112	FOXN3	protein-coding	forkhead box N3	chr14:89619165-89156177	Nucleoplasm (Approved); Additional: Plasma membrane
GNL3L	54552	GNL3L	protein-coding	G protein nucleolar 3 like	chrX:54530219-54645854	Nucleoli (Supported); Additional: Cytosol;Nucleoplasm
ZNF418	147686	ZNF418	protein-coding	zinc finger protein 418	chr19:57935402-57921882	Nucleoplasm (Uncertain)
FLT4	2324	FLT4	protein-coding	fms related receptor tyrosine kinase 4	chr5:180650298-180601506	Nuclear speckles;Plasma membrane (Supported); Additional: Cell Junctions
RASGRF1	5923	RASGRF1	protein-coding	Ras protein specific guanine nucleotide releasing factor 1	chr15:79090780-78959906	Golgi apparatus (Supported)
MRPL4	51073	MRPL4	protein-coding	mitochondrial ribosomal protein L4	chr19:10251951-10260055
TRIM68	55128	TRIM68	protein-coding	tripartite motif containing 68	chr11:4608231-4598672	Cytosol;Nucleoplasm (Supported)
DGCR8	54487	DGCR8	protein-coding	DGCR8 microprocessor complex subunit	chr22:20080241-20111872	Nucleoplasm (Supported); Additional: Cytosol;Nuclear bodies
ME2	4200	ME2	protein-coding	malic enzyme 2	chr18:50879118-50954257	Mitochondria (Supported)
NKX3-2	579	NKX3-2	protein-coding	NK3 homeobox 2	chr4:13547744-13540830	Nucleoplasm (Approved)
KSR1	8844	KSR1	protein-coding	kinase suppressor of ras 1	chr17:27456448-27626435	Cytosol (Supported); Additional: Vesicles
LRTOMT	220074	LRTOMT	protein-coding	leucine rich transmembrane and O-methyltransferase domain containing	chr11:72080850-72110782	Microtubules (Uncertain)
TRIM59	286827	TRIM59	protein-coding	tripartite motif containing 59	chr3:160449786-160435503	Rods & Rings (Approved)
ITIH4	3700	ITIH4	protein-coding	inter-alpha-trypsin inhibitor heavy chain 4	chr3:52830672-52812962	Vesicles (Approved)
GTF3C4	9329	GTF3C4	protein-coding	general transcription factor IIIC subunit 4	chr9:132670035-132694955	Nucleoplasm (Supported); Additional: Mitochondria
PPM1H	57460	PPM1H	protein-coding	protein phosphatase, Mg2+/Mn2+ dependent 1H	chr12:62935150-62643994	Nucleoplasm (Supported)
LENG8	114823	LENG8	protein-coding	leukocyte receptor cluster member 8	chr19:54449199-54462016	Nucleoplasm (Approved); Additional: Cytosol
LRP8	7804	LRP8	protein-coding	LDL receptor related protein 8	chr1:53328070-53242364
PCBD2	84105	PCBD2	protein-coding	pterin-4 alpha-carbinolamine dehydratase 2	chr5:134905131-134962644	Plasma membrane (Approved)
CNNM3	26505	CNNM3	protein-coding	cyclin and CBS domain divalent metal cation transport mediator 3	chr2:96816268-96837466	Cytosol (Approved)
NTRK2	4915	NTRK2	protein-coding	neurotrophic receptor tyrosine kinase 2	chr9:84668522-85027054	Plasma membrane (Supported)
MYO10	4651	MYO10	protein-coding	myosin X	chr5:16936288-16661907	Cytosol;Plasma membrane (Supported); Additional: Nucleoli rim
NICN1	84276	NICN1	protein-coding	nicolin 1, tubulin polyglutamylase complex subunit	chr3:49429324-49422333	Nucleoplasm (Supported)
SYT13	57586	SYT13	protein-coding	synaptotagmin 13	chr11:45286341-45240302	Vesicles (Supported)
MYO1C	4641	MYO1C	protein-coding	myosin IC	chr17:1492686-1464186	Nuclear bodies;Plasma membrane (Enhanced)
USH1G	124590	USH1G	protein-coding	USH1 protein network component sans	chr17:74923255-74916083
KCNK3	3777	KCNK3	protein-coding	potassium two pore domain channel subfamily K member 3	chr2:26692722-26733420
DHX58	79132	DHX58	protein-coding	DExH-box helicase 58	chr17:42112714-42101411	Cytosol;Golgi apparatus (Approved); Additional: Nucleoplasm
TRIM26	7726	TRIM26	protein-coding	tripartite motif containing 26	chr6:30213406-30184455	Cytosol;Nucleoplasm (Supported)
ATXN7L1	222255	ATXN7L1	protein-coding	ataxin 7 like 1	chr7:105876599-105604772	Cytosol;Nucleoplasm (Approved)
KIF21B	23046	KIF21B	protein-coding	kinesin family member 21B	chr1:201023714-200969390	Plasma membrane (Approved); Additional: Cytosol;Mitotic spindle
EPHA8	2046	EPHA8	protein-coding	EPH receptor A8	chr1:22563489-22603595
ENTPD5	957	ENTPD5	protein-coding	ectonucleoside triphosphate diphosphohydrolase 5 (inactive)	chr14:74019288-73955329
ENTPD6	955	ENTPD6	protein-coding	ectonucleoside triphosphate diphosphohydrolase 6	chr20:25195712-25228075	Golgi apparatus (Supported)
ANK1	286	ANK1	protein-coding	ankyrin 1	chr8:41896741-41653225
SUB1	10923	SUB1	protein-coding	SUB1 regulator of transcription	chr5:32585557-32604079	Nucleoli;Nucleoplasm (Supported)
NRN1	51299	NRN1	protein-coding	neuritin 1	chr6:6007518-5997999
WNK4	65266	WNK4	protein-coding	WNK lysine deficient protein kinase 4	chr17:42780610-42797066
RTF1	23168	RTF1	protein-coding	RTF1 homolog, Paf1/RNA polymerase II complex component	chr15:41417095-41483563	Nucleoplasm (Approved); Additional: Cytosol
PIK3R1	5295	PIK3R1	protein-coding	phosphoinositide-3-kinase regulatory subunit 1	chr5:68215756-68301821	Cytosol (Approved)
CD1D	912	CD1D	protein-coding	CD1d molecule	chr1:158178030-158186427	Endoplasmic reticulum (Supported)
KALRN	8997	KALRN	protein-coding	kalirin RhoGEF kinase	chr3:124033369-124726325	Cytosol;Nucleoplasm (Approved)
ZBTB3	79842	ZBTB3	protein-coding	zinc finger and BTB domain containing 3	chr11:62754160-62750963	Mitochondria (Approved)
SEC14L2	23541	SEC14L2	protein-coding	SEC14 like lipid binding 2	chr22:30397018-30425303	Nucleoplasm (Supported); Additional: Cytosol
ZNF709	163051	ZNF709	protein-coding	zinc finger protein 709	chr19:12484816-12461184	Nucleoplasm (Approved)
SYNGR1	9145	SYNGR1	protein-coding	synaptogyrin 1	chr22:39349991-39385575	Cytosol (Supported)
PCBP3	54039	PCBP3	protein-coding	poly(rC) binding protein 3	chr21:45643725-45942450	Mitochondria;Nucleoplasm (Approved); Additional: Vesicles
ST8SIA4	7903	ST8SIA4	protein-coding	ST8 alpha-N-acetyl-neuraminide alpha-2,8-sialyltransferase 4	chr5:100903282-100806933	Golgi apparatus (Approved)
YES1	7525	YES1	protein-coding	YES proto-oncogene 1, Src family tyrosine kinase	chr18:812753-721588	Cytosol;Plasma membrane (Supported)
TNFSF15	9966	TNFSF15	protein-coding	TNF superfamily member 15	chr9:114806039-114784635	Nuclear membrane (Approved); Additional: Cytosol;Nucleoplasm
RANBP10	57610	RANBP10	protein-coding	RAN binding protein 10	chr16:67806560-67723070
CD28	940	CD28	protein-coding	CD28 molecule	chr2:203706465-203738912
DDR1	780	DDR1	protein-coding	discoidin domain receptor tyrosine kinase 1	chr6:30880970-30900156	Cell Junctions;Nucleoplasm (Approved)
WFDC8	90199	WFDC8	protein-coding	WAP four-disulfide core domain 8	chr20:45579284-45551152
KHK	3795	KHK	protein-coding	ketohexokinase	chr2:27086772-27100762	Cytosol (Approved); Additional: Vesicles
PPP3CA	5530	PPP3CA	protein-coding	protein phosphatase 3 catalytic subunit alpha	chr4:101347526-101023418	Nucleoplasm (Enhanced); Additional: Cytosol
MAP1LC3A	84557	MAP1LC3A	protein-coding	microtubule associated protein 1 light chain 3 alpha	chr20:34546844-34560345	Vesicles (Approved)
MUC15	143662	MUC15	protein-coding	mucin 15, cell surface associated	chr11:26572263-26559032
LMCD1	29995	LMCD1	protein-coding	LIM and cysteine rich domains 1	chr3:8501823-8574668	Cytosol;Nucleoplasm (Supported); Additional: Cell Junctions;Plasma membrane
TMEM150A	129303	TMEM150A	protein-coding	transmembrane protein 150A	chr2:85602698-85598547
MMEL1	79258	MMEL1	protein-coding	membrane metalloendopeptidase like 1	chr1:2633016-2590639
TOX2	84969	TOX2	protein-coding	TOX high mobility group box family member 2	chr20:43914852-44069616	Nucleoplasm (Supported)
ARHGEF9	23229	ARHGEF9	protein-coding	Cdc42 guanine nucleotide exchange factor 9	chrX:63785214-63634967	Cytosol (Supported)
ZADH2	284273	PTGR3	protein-coding	prostaglandin reductase 3	chr18:75209139-75195108	Vesicles (Approved); Additional: Golgi apparatus;Nucleoplasm
CD44	960	CD44	protein-coding	CD44 molecule (Indian blood group)	chr11:35139171-35232402	Plasma membrane (Supported); Additional: Golgi apparatus
SSNA1	8636	SSNA1	protein-coding	SS nuclear autoantigen 1	chr9:137188676-137190366
DERL3	91319	DERL3	protein-coding	derlin 3	chr22:23839006-23834503	Vesicles (Uncertain)
CAMKK1	84254	CAMKK1	protein-coding	calcium/calmodulin dependent protein kinase kinase 1	chr17:3893053-3860315	Cytosol (Supported)
MAP3K1	4214	MAP3K1	protein-coding	mitogen-activated protein kinase kinase kinase 1	chr5:56815549-56896152	Cytosol (Approved)
SPRYD4	283377	SPRYD4	protein-coding	SPRY domain containing 4	chr12:56468578-56479708	Nucleoplasm (Approved)
NUDT8	254552	NUDT8	protein-coding	nudix hydrolase 8	chr11:67629937-67627938	Nucleoli (Approved); Additional: Cytosol
ZDHHC9	51114	ZDHHC9	protein-coding	zinc finger DHHC-type palmitoyltransferase 9	chrX:129843886-129803288	Endoplasmic reticulum;Golgi apparatus (Supported); Additional: Cytosol
CD84	8832	CD84	protein-coding	CD84 molecule	chr1:160579496-160541098	Plasma membrane (Enhanced); Additional: Vesicles
AMHR2	269	AMHR2	protein-coding	anti-Mullerian hormone receptor type 2	chr12:53423855-53431672	Vesicles (Approved); Additional: Cytosol;Nucleoplasm
PRDM6	93166	PRDM6	protein-coding	PR/SET domain 6	chr5:123089241-123194266	Nucleoplasm (Approved)
PCDH11X	27328	PCDH11X	protein-coding	protocadherin 11 X-linked	chrX:91779375-92623230
ARID2	196528	ARID2	protein-coding	AT-rich interaction domain 2	chr12:45729706-45908037	Nucleoplasm (Supported); Additional: Plasma membrane
PRND	23627	PRND	protein-coding	prion like protein doppel	chr20:4721909-4728460
KIRREL3	84623	KIRREL3	protein-coding	kirre like nephrin family adhesion molecule 3	chr11:127000870-126423358
IL4R	3566	IL4R	protein-coding	interleukin 4 receptor	chr16:27313756-27364778	Nucleoplasm;Plasma membrane (Approved); Additional: Centriolar satellite
CCDC157	550631	CCDC157	protein-coding	coiled-coil domain containing 157	chr22:30356624-30378673
GEM	2669	GEM	protein-coding	GTP binding protein overexpressed in skeletal muscle	chr8:94262319-94249253
MAP7D3	79649	MAP7D3	protein-coding	MAP7 domain containing 3	chrX:136256482-136213220	Centrosome (Uncertain); Additional: Cytosol
MASP1	5648	MASP1	protein-coding	MBL associated serine protease 1	chr3:187291737-187217282	Cytosol;Nucleoplasm (Enhanced)
GCM1	8521	GCM1	protein-coding	glial cells missing transcription factor 1	chr6:53148841-53126961	Vesicles (Approved)
SLC41A2	84102	SLC41A2	protein-coding	solute carrier family 41 member 2	chr12:104958746-104801801
KIF3C	3797	KIF3C	protein-coding	kinesin family member 3C	chr2:25982497-25926598	Intermediate filaments;Nuclear bodies (Approved); Additional: Nuclear membrane
WNT4	54361	WNT4	protein-coding	Wnt family member 4	chr1:22143097-22117313	Vesicles (Approved)
SYT7	9066	SYT7	protein-coding	synaptotagmin 7	chr11:61588387-61513714
GNAO1	2775	GNAO1	protein-coding	G protein subunit alpha o1	chr16:56191489-56357444
BMP2	650	BMP2	protein-coding	bone morphogenetic protein 2	chr20:6767686-6780246	Vesicles (Enhanced)
BMP1	649	BMP1	protein-coding	bone morphogenetic protein 1	chr8:22165372-22212326
APPBP2	10513	APPBP2	protein-coding	amyloid beta precursor protein binding protein 2	chr17:60526242-60443158	Nucleoplasm (Supported)
GNAS	2778	GNAS	protein-coding	GNAS complex locus	chr20:58839748-58911192	Nucleoplasm (Approved); Additional: Cytosol;Plasma membrane
ALPL	249	ALPL	protein-coding	alkaline phosphatase, biomineralization associated	chr1:21508984-21578410	Cytosol (Approved)
AFF3	3899	AFF3	protein-coding	AF4/FMR2 family member 3	chr2:100142590-99545419	Nucleoplasm (Supported); Additional: Cytosol
BCL7A	605	BCL7A	protein-coding	BAF chromatin remodeling complex subunit BCL7A	chr12:122021884-122062044	Nucleoplasm;Vesicles (Approved)
ZNF385B	151126	ZNF385B	protein-coding	zinc finger protein 385B	chr2:179861612-179441982	Nucleoli fibrillar center (Approved)
CYP4A11	1579	CYP4A11	protein-coding	cytochrome P450 family 4 subfamily A member 11	chr1:46941476-46929188
UBE2QL1	134111	UBE2QL1	protein-coding	ubiquitin conjugating enzyme E2 Q family like 1	chr5:6448859-6496723	Nucleoplasm (Supported); Additional: Plasma membrane
TAPBP	6892	TAPBP	protein-coding	TAP binding protein	chr6:33314078-33299694
FAM153A	285596	FAM153A	protein-coding	family with sequence similarity 153 member A	chr5:177783425-177694247
RNF8	9025	RNF8	protein-coding	ring finger protein 8	chr6:37353983-37394734	Nucleoplasm (Supported); Additional: Cytosol
RNF4	6047	RNF4	protein-coding	ring finger protein 4	chr4:2469106-2515857	Nuclear bodies;Nucleoplasm (Supported); Additional: Microtubule ends
GNG3	2785	GNG3	protein-coding	G protein subunit gamma 3	chr11:62706446-62709201
USF2	7392	USF2	protein-coding	upstream transcription factor 2, c-fos interacting	chr19:35268962-35279821	Nucleoplasm (Supported); Additional: Vesicles
MAPK11	5600	MAPK11	protein-coding	mitogen-activated protein kinase 11	chr22:50270380-50263713	Mitochondria (Approved)
RBM43	375287	RBM43	protein-coding	RNA binding motif protein 43	chr2:151261863-151247940	Nucleoli (Approved); Additional: Nucleoplasm
XYLT2	64132	XYLT2	protein-coding	xylosyltransferase 2	chr17:50346126-50361185
ADARB2	105	ADARB2	protein-coding	adenosine deaminase RNA specific B2 (inactive)	chr10:1737525-1177313
GLE1	2733	GLE1	protein-coding	GLE1 RNA export mediator	chr9:128504692-128542288	Nuclear membrane (Supported); Additional: Nucleoli
GJA4	2701	GJA4	protein-coding	gap junction protein alpha 4	chr1:34792999-34795747
DDX17	10521	DDX17	protein-coding	DEAD-box helicase 17	chr22:38506311-38483438	Nuclear speckles (Supported)
CLEC11A	6320	CLEC11A	protein-coding	C-type lectin domain containing 11A	chr19:50723364-50725708	Centrosome (Approved)
CD3EAP	10849	POLR1G	protein-coding	RNA polymerase I subunit G	chr19:45406644-45410737	Nucleoli fibrillar center;Nucleoplasm (Enhanced); Additional: Mitochondria
SOX10	6663	SOX10	protein-coding	SRY-box transcription factor 10	chr22:37984555-37972312	Nucleoplasm (Supported)
DYNC1LI2	1783	DYNC1LI2	protein-coding	dynein cytoplasmic 1 light intermediate chain 2	chr16:66751609-66720893	Centrosome (Approved); Additional: Cytosol
RNF121	55298	RNF121	protein-coding	ring finger protein 121	chr11:71929046-71997597	Golgi apparatus (Approved); Additional: Nucleoplasm;Vesicles
ASF1B	55723	ASF1B	protein-coding	anti-silencing function 1B histone chaperone	chr19:14136589-14119512	Nucleoplasm (Supported)
GLG1	2734	GLG1	protein-coding	golgi glycoprotein 1	chr16:74607114-74447440	Golgi apparatus (Supported)
FAM149A	25854	FAM149A	protein-coding	family with sequence similarity 149 member A	chr4:186104704-186175337	Golgi apparatus (Approved)
CHST15	51363	CHST15	protein-coding	carbohydrate sulfotransferase 15	chr10:124093598-124007668	Cytosol (Approved); Additional: Centrosome
NHEJ1	79840	NHEJ1	protein-coding	non-homologous end joining factor 1	chr2:219160815-219069357	Nucleoplasm (Supported); Additional: Nucleoli fibrillar center
CGN	57530	CGN	protein-coding	cingulin	chr1:151510170-151538692	Cell Junctions;Plasma membrane (Supported)
SLC6A8	6535	SLC6A8	protein-coding	solute carrier family 6 member 8	chrX:153687926-153696593
TCN2	6948	TCN2	protein-coding	transcobalamin 2	chr22:30607174-30627271	Cytosol (Approved)
PPT2	9374	PPT2	protein-coding	palmitoyl-protein thioesterase 2	chr6:32153528-32163675	Vesicles (Supported)
ATG2B	55102	ATG2B	protein-coding	autophagy related 2B	chr14:96363341-96279195
HIF3A	64344	HIF3A	protein-coding	hypoxia inducible factor 3 subunit alpha	chr19:46297042-46343433	Cytosol;Nucleoplasm (Supported); Additional: Plasma membrane
SMG5	23381	SMG5	protein-coding	SMG5 nonsense mediated mRNA decay factor	chr1:156291516-156249224	Cytoplasmic bodies (Uncertain)
GPR132	29933	GPR132	protein-coding	G protein-coupled receptor 132	chr14:105065430-105049395
FAM102A	399665	FAM102A	protein-coding	family with sequence similarity 102 member A	chr9:127980989-127940582	Cytosol (Approved)
TRIM5	85363	TRIM5	protein-coding	tripartite motif containing 5	chr11:5685074-5588635	Cytosol (Supported)
ZNF280C	55609	ZNF280C	protein-coding	zinc finger protein 280C	chrX:130268899-130202707	Nucleoli fibrillar center;Nucleoplasm (Approved)
AP3S1	1176	AP3S1	protein-coding	adaptor related protein complex 3 subunit sigma 1	chr5:115841935-115914081	Vesicles (Approved)
BRD3	8019	BRD3	protein-coding	bromodomain containing 3	chr9:134068548-134030305	Nuclear bodies (Approved)
PLLP	51090	PLLP	protein-coding	plasmolipin	chr16:57284672-57256097
EXOC7	23265	EXOC7	protein-coding	exocyst complex component 7	chr17:76103787-76081016	Cytosol (Approved); Additional: Plasma membrane;Vesicles
SERPINB8	5271	SERPINB8	protein-coding	serpin family B member 8	chr18:63970081-64019779	Nucleoplasm (Approved); Additional: Cytosol
BACE2	25825	BACE2	protein-coding	beta-secretase 2	chr21:41168160-41282530
C10orf67	256815	C10orf67	protein-coding	chromosome 10 open reading frame 67	chr10:23344797-23201916	Microtubules;Mitochondria;Vesicles (Approved)
TMEM164	84187	TMEM164	protein-coding	transmembrane protein 164	chrX:110002369-110184251	Vesicles (Approved); Additional: Cell Junctions
METTL7A	25840	METTL7A	protein-coding	methyltransferase like 7A	chr12:50925015-50932508	Lipid droplets (Supported)
MTFMT	123263	MTFMT	protein-coding	mitochondrial methionyl-tRNA formyltransferase	chr15:65029639-65001512	Nucleoplasm (Approved); Additional: Cytosol
DGKD	8527	DGKD	protein-coding	diacylglycerol kinase delta	chr2:233354494-233472098	Cytosol (Supported)
IRS1	3667	IRS1	protein-coding	insulin receptor substrate 1	chr2:226799820-226731312	Cytosol;Nucleoplasm (Supported); Additional: Plasma membrane
C11orf49	79096	CSTPP1	protein-coding	centriolar satellite-associated tubulin polyglutamylase complex regulator 1	chr11:46936689-47164385	Nuclear speckles (Approved)
SLC15A1	6564	SLC15A1	protein-coding	solute carrier family 15 member 1	chr13:98752672-98683801	Cytosol;Nucleoplasm (Approved)
SUPT16H	11198	SUPT16H	protein-coding	SPT16 homolog, facilitates chromatin remodeling subunit	chr14:21384019-21351476	Nucleoplasm (Supported); Additional: Nucleoli fibrillar center
MAGI3	260425	MAGI3	protein-coding	membrane associated guanylate kinase, WW and PDZ domain containing 3	chr1:113390515-113685923	Cell Junctions (Supported)
THNSL2	55258	THNSL2	protein-coding	threonine synthase like 2	chr2:88170346-88186627
RNF41	10193	RNF41	protein-coding	ring finger protein 41	chr12:56221969-56202179	Nuclear bodies;Nucleoplasm (Approved); Additional: Midbody ring
ILF3	3609	ILF3	protein-coding	interleukin enhancer binding factor 3	chr19:10654346-10692400	Mitochondria;Nucleoli;Nucleoplasm (Enhanced)
ZNF319	57567	ZNF319	protein-coding	zinc finger protein 319	chr16:58000672-57994676	Nucleoplasm (Approved)
FAM8A1	51439	FAM8A1	protein-coding	family with sequence similarity 8 member A1	chr6:17600302-17611715	Golgi apparatus (Approved)
IFNAR1	3454	IFNAR1	protein-coding	interferon alpha and beta receptor subunit 1	chr21:33324395-33359864
GLYR1	84656	GLYR1	protein-coding	glyoxylate reductase 1 homolog	chr16:4847288-4803203	Nucleoplasm (Supported); Additional: Cytosol
DGKH	160851	DGKH	protein-coding	diacylglycerol kinase eta	chr13:42040070-42256584	Plasma membrane (Supported); Additional: Vesicles
UGT3A1	133688	UGT3A1	protein-coding	UDP glycosyltransferase family 3 member A1	chr5:36001022-35951006	Cytosol;Vesicles (Approved)
ATP8B2	57198	ATP8B2	protein-coding	ATPase phospholipid transporting 8B2	chr1:154325525-154351304	Plasma membrane (Supported); Additional: Cytosol;Nucleoli
LHX6	26468	LHX6	protein-coding	LIM homeobox 6	chr9:122228957-122202582	Nucleoli fibrillar center (Uncertain); Additional: Plasma membrane
PTPN23	25930	PTPN23	protein-coding	protein tyrosine phosphatase non-receptor type 23	chr3:47381021-47413435	Nuclear bodies;Nucleoplasm (Supported); Additional: Vesicles
DUSP13	51207	DUSP13	protein-coding	dual specificity phosphatase 13	chr10:75109191-75094434
PGPEP1	54858	PGPEP1	protein-coding	pyroglutamyl-peptidase I	chr19:18340598-18369950	Golgi apparatus (Approved)
SH3D19	152503	SH3D19	protein-coding	SH3 domain containing 19	chr4:151325605-151120281	Cytosol;Nucleoplasm (Supported)
RAB1B	81876	RAB1B	protein-coding	RAB1B, member RAS oncogene family	chr11:66268639-66277492	Golgi apparatus (Supported); Additional: Endoplasmic reticulum
HDAC7	51564	HDAC7	protein-coding	histone deacetylase 7	chr12:47821344-47782722	Cytosol (Supported)
RAB21	23011	RAB21	protein-coding	RAB21, member RAS oncogene family	chr12:71754863-71800286
DCAF17	80067	DCAF17	protein-coding	DDB1 and CUL4 associated factor 17	chr2:171434226-171485052	Nucleoplasm (Supported)
XIRP1	165904	XIRP1	protein-coding	xin actin binding repeat containing 1	chr3:39192595-39183215	Actin filaments;Plasma membrane (Approved); Additional: Nucleoplasm
POLR2F	5435	POLR2F	protein-coding	RNA polymerase II, I and III subunit F	chr22:37953663-38041915	Nucleoli fibrillar center;Nucleoplasm (Supported)
WASF2	10163	WASF2	protein-coding	WASP family member 2	chr1:27490167-27404230	Plasma membrane (Approved); Additional: Cytosol
MEST	4232	MEST	protein-coding	mesoderm specific transcript	chr7:130486175-130506465	Cytosol;Golgi apparatus (Approved)
ANGPT2	285	ANGPT2	protein-coding	angiopoietin 2	chr8:6563245-6499632
RNF26	79102	RNF26	protein-coding	ring finger protein 26	chr11:119334527-119337309	Nucleoplasm (Approved); Additional: Cytosol;Vesicles
FBXL17	64839	FBXL17	protein-coding	F-box and leucine rich repeat protein 17	chr5:108382098-107859035	Nucleoplasm (Supported)
KLF2	10365	KLF2	protein-coding	Kruppel like factor 2	chr19:16324826-16328685	Nucleoplasm (Approved)
MFAP4	4239	MFAP4	protein-coding	microfibril associated protein 4	chr17:19387190-19383445	Endoplasmic reticulum (Approved)
ASXL2	55252	ASXL2	protein-coding	ASXL transcriptional regulator 2	chr2:25878487-25733753	Nucleoplasm (Enhanced)
TRMT61A	115708	TRMT61A	protein-coding	tRNA methyltransferase 61A	chr14:103529196-103537073	Mitochondria (Approved)
PARS2	25973	PARS2	protein-coding	prolyl-tRNA synthetase 2, mitochondrial	chr1:54764523-54756898	Mitochondria;Nucleoli fibrillar center (Approved)
FCF1	51077	FCF1	protein-coding	FCF1 rRNA-processing protein	chr14:74713144-74738620	Nucleoplasm (Approved)
FLAD1	80308	FLAD1	protein-coding	flavin adenine dinucleotide synthetase 1	chr1:154983344-154993111	Cytosol;Plasma membrane (Supported)
TBC1D10A	83874	TBC1D10A	protein-coding	TBC1 domain family member 10A	chr22:30326941-30291990	Plasma membrane (Enhanced)
UHRF1BP1	54887	UHRF1BP1	protein-coding	UHRF1 binding protein 1	chr6:34792083-34877514	Nuclear membrane;Nucleoplasm (Approved); Additional: Cytosol
HKR1	284459	ZNF875	protein-coding	zinc finger protein 875	chr19:37312837-37364455	Mitochondria;Nucleoplasm (Approved)
TEX261	113419	TEX261	protein-coding	testis expressed 261	chr2:70994873-70985942	Cytosol;Nucleoplasm (Approved)
RPAP2	79871	RPAP2	protein-coding	RNA polymerase II associated protein 2	chr1:92299059-92402056	Cytosol;Nucleoli (Supported)
INPP5B	3633	INPP5B	protein-coding	inositol polyphosphate-5-phosphatase B	chr1:37947057-37860697	Cytosol (Supported)
TRPM7	54822	TRPM7	protein-coding	transient receptor potential cation channel subfamily M member 7	chr15:50686797-50557158	Plasma membrane (Approved); Additional: Cytosol;Vesicles
PARVA	55742	PARVA	protein-coding	parvin alpha	chr11:12376436-12535356	Actin filaments;Focal adhesion sites (Supported); Additional: Cytosol
IGFL1	374918	IGFL1	protein-coding	IGF like family member 1	chr19:46229742-46231243
C12orf73	728568	C12orf73	protein-coding	chromosome 12 open reading frame 73	chr12:103965707-103950194	Centrosome;Mitochondria (Approved); Additional: Plasma membrane
ROBO2	6092	ROBO2	protein-coding	roundabout guidance receptor 2	chr3:75906675-77649964	Plasma membrane (Approved); Additional: Centriolar satellite;Nucleoplasm
GSG1	83445	GSG1	protein-coding	germ cell associated 1	chr12:13103667-13083532
RAB8A	4218	RAB8A	protein-coding	RAB8A, member RAS oncogene family	chr19:16111889-16134234	Nucleoplasm;Plasma membrane (Approved)
RHOA	387	RHOA	protein-coding	ras homolog family member A	chr3:49411976-49359145	Cytosol;Plasma membrane (Supported)
SCNM1	79005	SCNM1	protein-coding	sodium channel modifier 1	chr1:151166144-151170296	Nucleoplasm (Approved)
CXCR5	643	CXCR5	protein-coding	C-X-C motif chemokine receptor 5	chr11:118883892-118897787
RGPD8	727851	RGPD8	protein-coding	RANBP2 like and GRIP domain containing 8	chr2:112433645-112368369	Nuclear membrane;Vesicles (Uncertain)
RGPD1	400966	RGPD1	protein-coding	RANBP2 like and GRIP domain containing 1	chr2:86913324-87013976	Nuclear membrane;Vesicles (Approved)
DISC1	27185	DISC1	protein-coding	DISC1 scaffold protein	chr1:231626790-232041272	Cytosol;Intermediate filaments (Supported)
NFYC	4802	NFYC	protein-coding	nuclear transcription factor Y subunit gamma	chr1:40691704-40771603	Nucleoplasm (Supported)
SCD5	79966	SCD5	protein-coding	stearoyl-CoA desaturase 5	chr4:82798796-82629539
TPPP3	51673	TPPP3	protein-coding	tubulin polymerization promoting protein family member 3	chr16:67393498-67389809	Nucleoli fibrillar center (Approved)
AXL	558	AXL	protein-coding	AXL receptor tyrosine kinase	chr19:41219223-41261766	Plasma membrane (Supported); Additional: Actin filaments;Vesicles
RAB3GAP2	25782	RAB3GAP2	protein-coding	RAB3 GTPase activating non-catalytic protein subunit 2	chr1:220272453-220148293	Cytosol (Supported); Additional: Plasma membrane
ITPRIP	85450	ITPRIP	protein-coding	inositol 1,4,5-trisphosphate receptor interacting protein	chr10:104338465-104309700	Vesicles (Uncertain)
NDUFA10	4705	NDUFA10	protein-coding	NADH:ubiquinone oxidoreductase subunit A10	chr2:240025342-239892442	Mitochondria (Supported)
GALNT10	55568	GALNT10	protein-coding	polypeptide N-acetylgalactosaminyltransferase 10	chr5:154190733-154420984	Plasma membrane (Approved); Additional: Golgi apparatus;Nucleoplasm
UNC5CL	222643	UNC5CL	protein-coding	unc-5 family C-terminal like	chr6:41039221-41026895	Centrosome (Approved)
SHISA6	388336	SHISA6	protein-coding	shisa family member 6	chr17:11241213-11564063	Nucleoplasm;Plasma membrane (Approved)
ELMO1	9844	ELMO1	protein-coding	engulfment and cell motility 1	chr7:37449326-36852906
FAM83E	54854	FAM83E	protein-coding	family with sequence similarity 83 member E	chr19:48615076-48599961	Cytosol (Approved); Additional: Vesicles
RIPK1	8737	RIPK1	protein-coding	receptor interacting serine/threonine kinase 1	chr6:3063967-3115187	Cytosol;Plasma membrane (Approved)
ARHGAP27	201176	ARHGAP27	protein-coding	Rho GTPase activating protein 27	chr17:45432870-45393908	Cytosol;Nucleoplasm (Approved)
ACSF3	197322	ACSF3	protein-coding	acyl-CoA synthetase family member 3	chr16:89093852-89156233	Mitochondria (Supported); Additional: Nucleoplasm
POU2F3	25833	POU2F3	protein-coding	POU class 2 homeobox 3	chr11:120236638-120319945	Nucleoplasm (Approved); Additional: Cytosol;Nuclear bodies;Nucleoli;Plasma membrane
EFNA3	1944	EFNA3	protein-coding	ephrin A3	chr1:155078837-155087538
COL20A1	57642	COL20A1	protein-coding	collagen type XX alpha 1 chain	chr20:63293186-63334806	Endoplasmic reticulum (Uncertain)
GLP2R	9340	GLP2R	protein-coding	glucagon like peptide 2 receptor	chr17:9825924-9892099	Plasma membrane (Supported)
DCN	1634	DCN	protein-coding	decorin	chr12:91182817-91140484
FCHSD1	89848	FCHSD1	protein-coding	FCH and double SH3 domains 1	chr5:141651418-141639302	Nucleoplasm (Approved); Additional: Cytosol
DBF4B	80174	DBF4B	protein-coding	DBF4 zinc finger B	chr17:44708665-44752264	Nucleoplasm (Supported); Additional: Vesicles
RASD2	23551	RASD2	protein-coding	RASD family member 2	chr22:35532806-35553999	Cytosol;Plasma membrane (Approved)
ZNF286A	57335	ZNF286A	protein-coding	zinc finger protein 286A	chr17:15699752-15720787	Nucleoli (Approved)
CDK2AP2	10263	CDK2AP2	protein-coding	cyclin dependent kinase 2 associated protein 2	chr11:67508162-67506497	Nucleoplasm (Approved)
